# Supplementary material for: Synthesis of fluorescent enone derived α-amino acids
Source: Royal Society of Chemistry journal article supplement (doi:10.1039/b912782h), 2009-01-01

## Supporting Information for:

### Synthesis of fluorescent enone derived $\alpha$ -amino acids

Lindsay S. Fowler,<sup>a</sup> David Ellis,<sup>b</sup> and Andrew Sutherland<sup>a\*</sup>

<sup>a</sup>*WestCHEM, Department of Chemistry, The Joseph Black Building, University of Glasgow, Glasgow, G12 8QQ, UK.* <sup>b</sup>*Pfizer Ltd, Sandwich, Kent, CT13 9NJ, UK.*  
*Email: andrews@chem.gla.ac.uk*

### Table Of Contents

|                                                                              |        |
|------------------------------------------------------------------------------|--------|
| 1. Experimental Procedures and Spectroscopic Data For All Known Compounds    | S2-S3  |
| 2. References                                                                | S4     |
| 3. <sup>1</sup> H NMR and <sup>13</sup> C NMR Spectra of All Novel Compounds | S5-S52 |

## 1. Experimental Procedures and Spectroscopic Data For All Known Compounds

**Dimethyl (2S)-2-aminobutandioate hydrochloride 5.**<sup>1</sup> To a suspension of L-aspartic acid **4** (5.0 g, 37.56 mmol) in methanol (30 mL) at 0 °C under argon was added dropwise thionyl chloride (4 mL, 52.58 mmol). The reaction mixture was allowed to warm to room temperature and heated under reflux for 3 h. The solution was concentrated *in vacuo* to give a colourless oil and triturated with diethyl ether to give **5** as an colourless solid (7.55 g, 100%). mp 115–116 °C (lit.,<sup>1</sup> mp 114–115 °C);  $[\alpha]_{\text{D}}^{24} +22.0$  (*c* 1.0, MeOH);  $\delta_{\text{H}}$  (400 MHz, DMSO-*d*<sub>6</sub>) 2.99 (1H, dd, *J* 18.0, 5.5 Hz, 3-*HH*), 3.05 (1H, dd, *J* 18.0, 5.5 Hz, 3-*HH*), 3.66 (3H, s, OMe), 3.74 (3H, s, OMe), 4.35 (1H, t, *J* 5.5 Hz, 2-H), 8.72 (3H, s, CHNH<sub>3</sub><sup>+</sup>);  $\delta_{\text{C}}$  (100 MHz, DMSO-*d*<sub>6</sub>) 34.0 (CH<sub>2</sub>), 48.4 (CH), 52.2 (CH<sub>3</sub>), 53.0 (CH<sub>3</sub>), 168.7 (C), 169.6 (C); *m/z* (CI) 162 (MH<sup>+</sup>, 100%), 148 (5), 102 (20).

**Dimethyl (2S)-2-(tritylamino)butandioate 6.**<sup>2</sup> To a solution of dimethyl (2S)-2-aminobutandioate hydrochloride **5** (7.46 g, 37.72 mmol) in dichloromethane (150 mL) at 0 °C under argon was added dropwise triethylamine (11 mL, 75.44 mmol) and triphenylmethyl chloride (10.50 g, 37.72 mmol). The reaction mixture was allowed to warm to room temperature and stirred for 24 h. The reaction mixture was washed with citric acid (2 M, 100 mL), water (100 mL), brine (100 mL) then dried (MgSO<sub>4</sub>) and concentrated *in vacuo* to give a colourless oil. The crude product was purified by column chromatography on silica eluting with 50% diethyl ether in petroleum ether to give **6** a colourless solid (15.16 g, 100%). mp 71–72 °C (lit.,<sup>2</sup> mp 70–71 °C);  $[\alpha]_{\text{D}}^{24} +36.6$  (*c* 1.0, CHCl<sub>3</sub>);  $\delta_{\text{H}}$  (400 MHz, CDCl<sub>3</sub>) 2.51 (1H, dd, *J* 14.7, 7.0 Hz, 3-*HH*), 2.66 (1H, dd, *J* 14.7, 5.4 Hz, 3-*HH*), 2.93 (1H, d, *J* 10.1 Hz, NH), 3.25 (3H, s, OMe), 3.67 (3H, s, OMe), 3.68–3.73 (1H, m, 2-H), 7.15–7.20 (3H, m, ArH), 7.23–7.28 (6H, m, ArH), 7.46–7.51 (6H, m, ArH);  $\delta_{\text{C}}$  (100 MHz, CDCl<sub>3</sub>) 39.0 (CH<sub>2</sub>), 50.5 (CH), 50.7 (CH<sub>3</sub>), 52.4 (CH<sub>3</sub>), 69.9 (C), 125.2 (CH), 126.6 (CH), 127.5 (CH), 144.4 (C), 169.7 (C), 172.6 (C); *m/z* (EI) 403 (M<sup>+</sup>, 1%), 326 (35), 243 (100), 165 (30), 83 (70).

**Methyl (2S)-5-(dimethoxyphosphoryl)-4-oxo-2-(tritylamino)pentanoate 7.**<sup>2</sup> A solution of dimethyl methylphosphonate (3.0 mL, 27.26 mmol) in THF (50 mL) was cooled to –78 °C under argon. *n*-Butyl lithium (2.5 M in hexane, 11 mL, 28.62 mmol) was added dropwise and the reaction mixture stirred for 1 h. In a separate reaction vessel, a solution of dimethyl (2S)-2-(tritylamino)butandioate **6** (5.0 g, 12.39 mmol) in THF (100 mL) was cooled to –78 °C under argon and then the dimethyl methylphosphonate/*n*-butyl lithium solution was cannulated into the flask and the reaction mixture stirred at –78 °C for 2 h to give a yellow solution. The reaction was quenched with a saturated solution of ammonium chloride (3 mL) and allowed to warm to room temperature. The

mixture was concentrated *in vacuo*. The resulting residue was diluted with ethyl acetate (100 mL), washed with water (2 × 100 mL), brine (100 mL) then dried (MgSO<sub>4</sub>) and concentrated *in vacuo*. The crude product was purified by column chromatography on silica eluting with 75% ethyl acetate in petroleum ether to give **7** as a colourless solid (4.93 g, 80%). mp 117–118 °C (lit.,<sup>2</sup> mp 117–118.5 °C);  $[\alpha]_D^{24} +31.1$  (*c* 1.0, CHCl<sub>3</sub>);  $\delta_H$  (400 MHz, CDCl<sub>3</sub>) 2.78 (1H, dd, *J* 16.7, 6.9 Hz, 3-*HH*), 2.85–2.95 (2H, m, 3-*HH* and NH), 3.06 (2H, d, *J*<sub>H-C-P</sub> 22.7 Hz, 5-H<sub>2</sub>), 3.29 (3H, s, OMe), 3.65–3.73 (1H, m, 2-H), 3.76 (3H, s, OMe), 3.79 (3H, s, OMe), 7.15–7.21 (3H, m, ArH), 7.26 (6H, t, *J* 7.7 Hz, ArH), 7.47 (6H, d, *J* 7.7 Hz, ArH);  $\delta_C$  (100 MHz, CDCl<sub>3</sub>) 41.8 (d, *J*<sub>C-P</sub> 128 Hz, CH<sub>2</sub>), 48.7 (CH<sub>2</sub>), 52.0 (CH<sub>3</sub>), 52.9 (CH<sub>3</sub>), 53.0 (CH<sub>3</sub>), 53.1 (CH), 71.2 (C), 126.5 (CH), 127.9 (CH), 128.7 (CH), 145.6 (C), 174.0 (C), 199.2 (C); *m/z* (CI) 496 (MH<sup>+</sup>, 1%), 301 (5), 254 (90), 243 (100), 237 (55), 167 (45).

**4-(4'-benzyloxycarbonylaminophenyl)benzaldehyde (Table 1, entry 13).** To a solution of 4-bromobenzaldehyde (0.30 g, 1.62 mmol) in *N,N*-dimethylformamide/water (10 mL, 95:5) was added 4-(benzyloxycarbonylamino)phenylboronic acid (0.66 g, 2.43 mmol), tetrakis(triphenylphosphine)palladium (0.04 g, 0.03 mmol) and potassium carbonate (0.56 g, 4.05 mmol). The reaction mixture was heated to 110 °C and stirred for 4 h. The solution was allowed to cool to room temperature then concentrated *in vacuo*. The residue was dissolved in chloroform, filtered through celite<sup>®</sup>, and then the filtrate was concentrated *in vacuo*. The resultant solid was dissolved in diethyl ether (100 mL), then washed with water (6 × 100 mL), brine (2 × 100 mL), dried (MgSO<sub>4</sub>), and concentrated *in vacuo*. The crude product was purified by column chromatography on silica eluting with 15% ethyl acetate in petroleum ether to give a colourless solid (0.19 g, 36%). mp 132–133 °C;  $\nu_{\max}/\text{cm}^{-1}$  (neat) 3331(NH), 1730 (CO), 1697 (CO), 1593, 1568, 1533, 1514, 1425, 1219;  $\delta_H$  (400 MHz, CDCl<sub>3</sub>) 5.23 (2H, s, PhCH<sub>2</sub>), 6.81 (1H, s, NH), 7.31–7.45 (5H, m, ArH), 7.51 (2H, d, *J* 8.2 Hz, ArH), 7.60 (2H, d, *J* 8.2 Hz, ArH), 7.72 (2H, d, *J* 8.0 Hz, ArH), 7.93 (2H, d, *J* 8.0 Hz, ArH), 10.04 (1H, s, CHO);  $\delta_C$  (100 MHz, CDCl<sub>3</sub>) 67.2 (CH<sub>2</sub>), 119.1 (CH), 127.2 (CH), 128.0 (CH), 128.4 (CH), 128.5 (CH), 128.7 (CH), 130.4 (CH), 134.5 (C), 134.9 (C), 136.0 (C), 138.5 (C), 146.5 (C), 153.4 (C), 192.1 (CH); *m/z* (EI) 331.1207 (M<sup>+</sup>. C<sub>21</sub>H<sub>17</sub>NO<sub>3</sub> requires 331.1208), 287 (31%), 223 (92), 166 (22), 139 (21), 91 (100).

**4-(3'-Nitrophenyl)benzaldehyde (Table 1, entry 12).** Prepared using the procedure described above. Spectroscopic data as previously reported.<sup>3</sup>

**5-(4'-Fluorophenyl)-2-furaldehyde (Table 1, entry 14).** Prepared using the procedure described above. Spectroscopic data as previously reported.<sup>4</sup>

### 3. References

1. P. Gmeiner, P. L. Feldman, M. Y. Chu-Moyer and H. Rapoport, *J. Org. Chem.*, 1990, **55**, 3068.
2. D. E. Rudisill and J. P. Whitten, *Synthesis*, 1994, 851.
3. B. Tao and D. W. Boykin, *J. Org. Chem.*, 2004, **69**, 4330.
4. T. Hosoya, H. Aoyama, T. Ikemoto, Y. Kihara, T. Hiramatsu, M. Endo and M. Suzuki, *Bioorg. Med. Chem.*, 2003, **11**, 663.

7.510  
7.491  
7.454  
7.404  
7.399  
7.263  
7.244  
7.225  
7.187  
7.169  
7.151  
6.707  
6.667

3.801  
3.787  
3.281  
2.940  
2.928  
2.903  
2.890  
2.816  
2.798  
2.778  
2.760

0.000

User - Lindsay Fowler  
LF200B1  
PROTON\_C\_A3.gla CDCl3 u lindfo 56

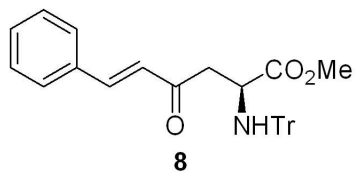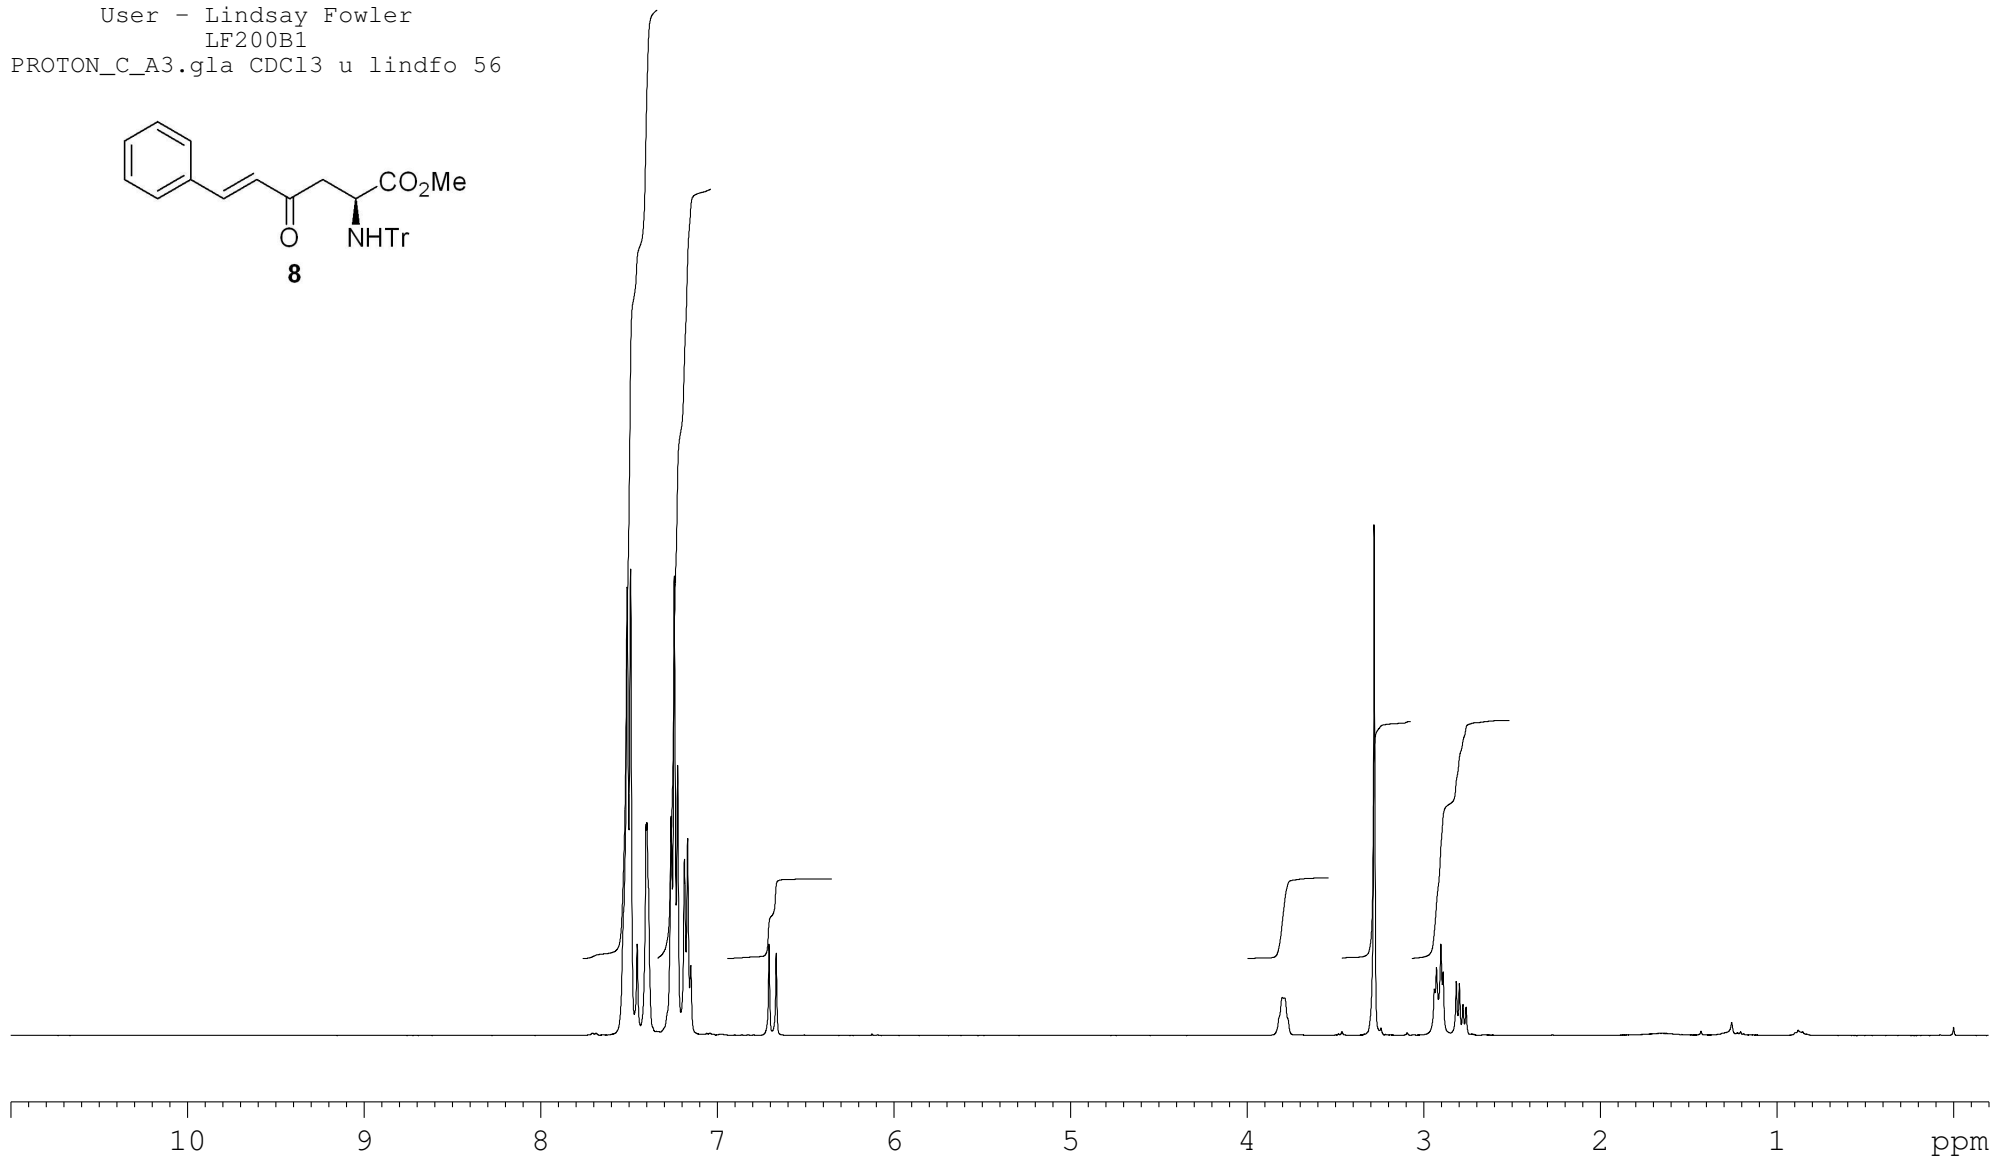

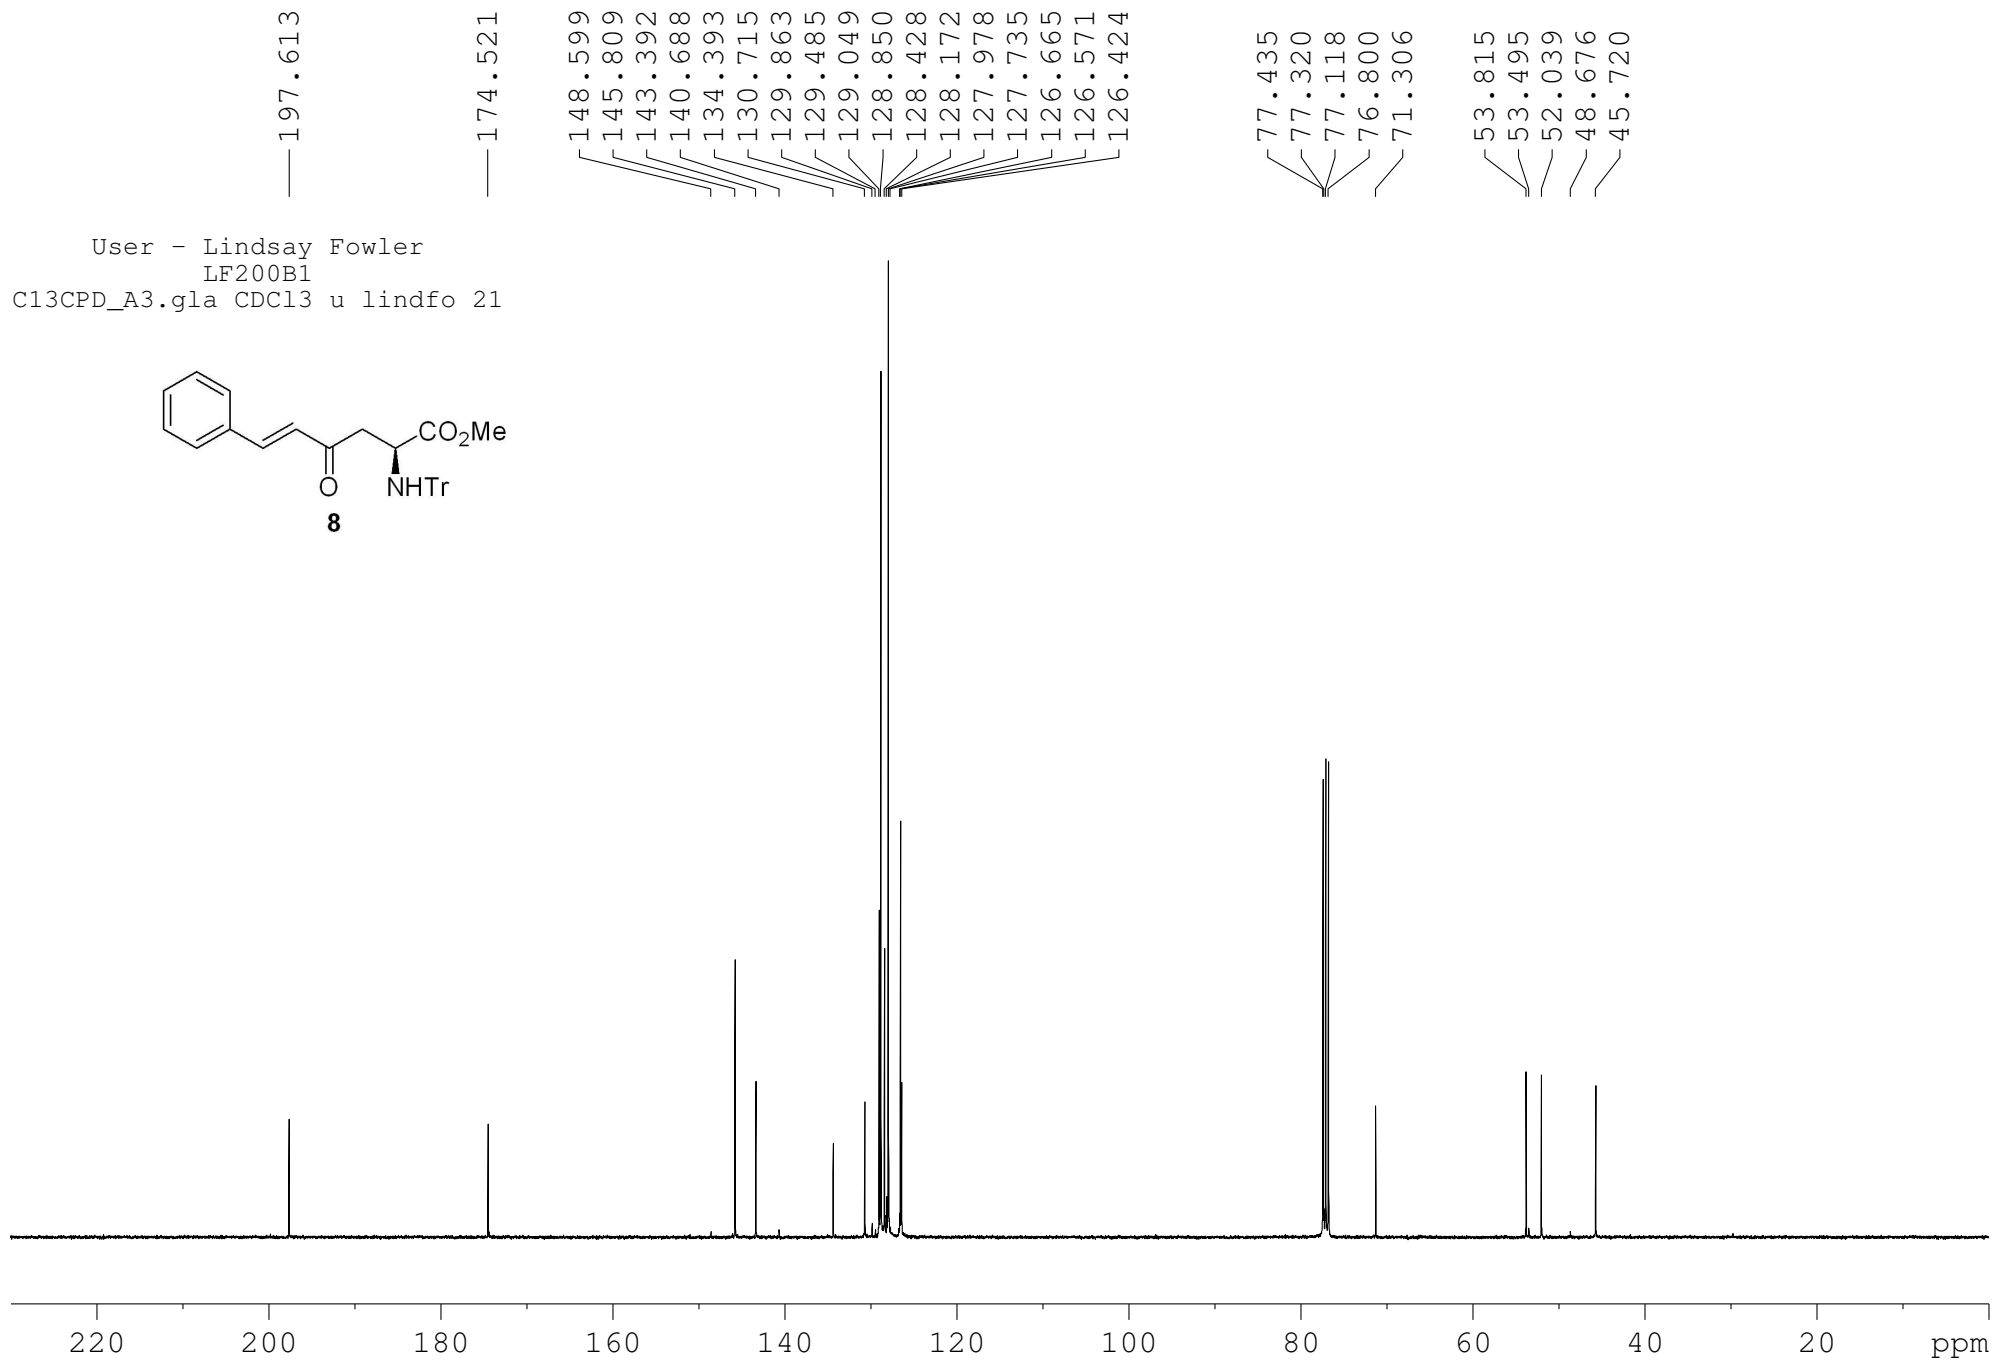

7.532  
7.506  
7.487  
7.461  
7.420  
7.309  
7.287  
7.264  
7.246  
7.227  
7.191  
7.173  
7.155  
7.112  
7.091  
7.070  
6.632  
6.591

3.782  
3.281  
2.925  
2.912  
2.887  
2.874  
2.805  
2.788  
2.767  
2.749

0.000

User - Lindsay Fowler  
LF075B2  
PROTON\_C\_A3.gla CDC13 u lindfo 21

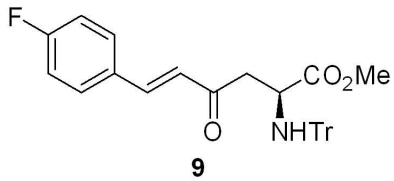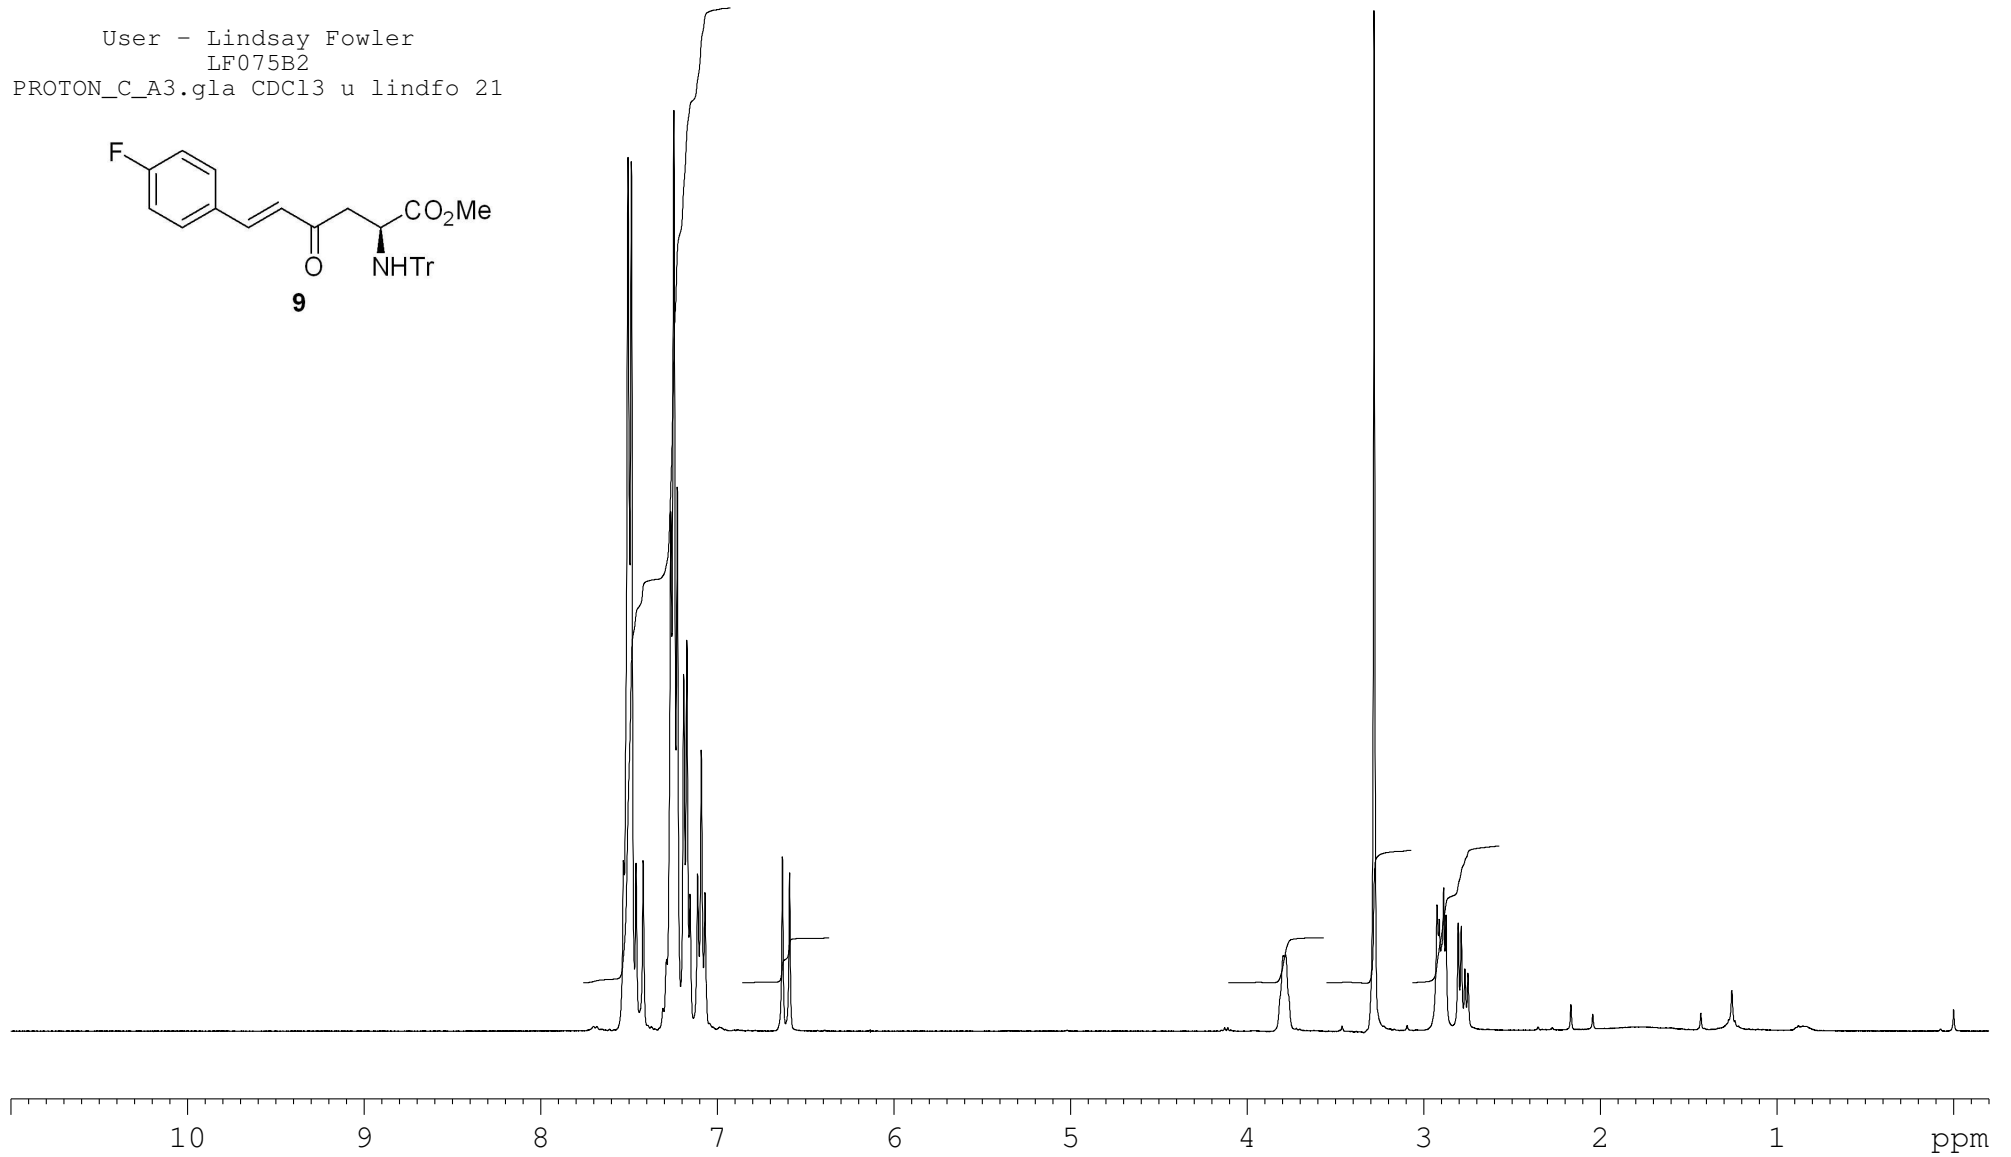

— 197.337

— 174.469

— 165.380

— 162.876

— 145.773

— 141.975

— 130.647

— 130.612

— 130.339

— 130.253

— 128.825

— 128.155

— 127.953

— 127.127

— 126.635

— 126.560

— 126.081

— 126.063

— 116.329

— 116.113

77.385

77.270

77.067

76.750

71.289

53.781

52.021

45.825

User - Lindsay Fowler  
LF075B2  
C13CPD\_A3.gla CDC13 u lindfo 9

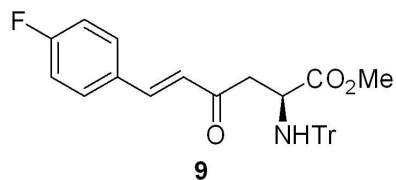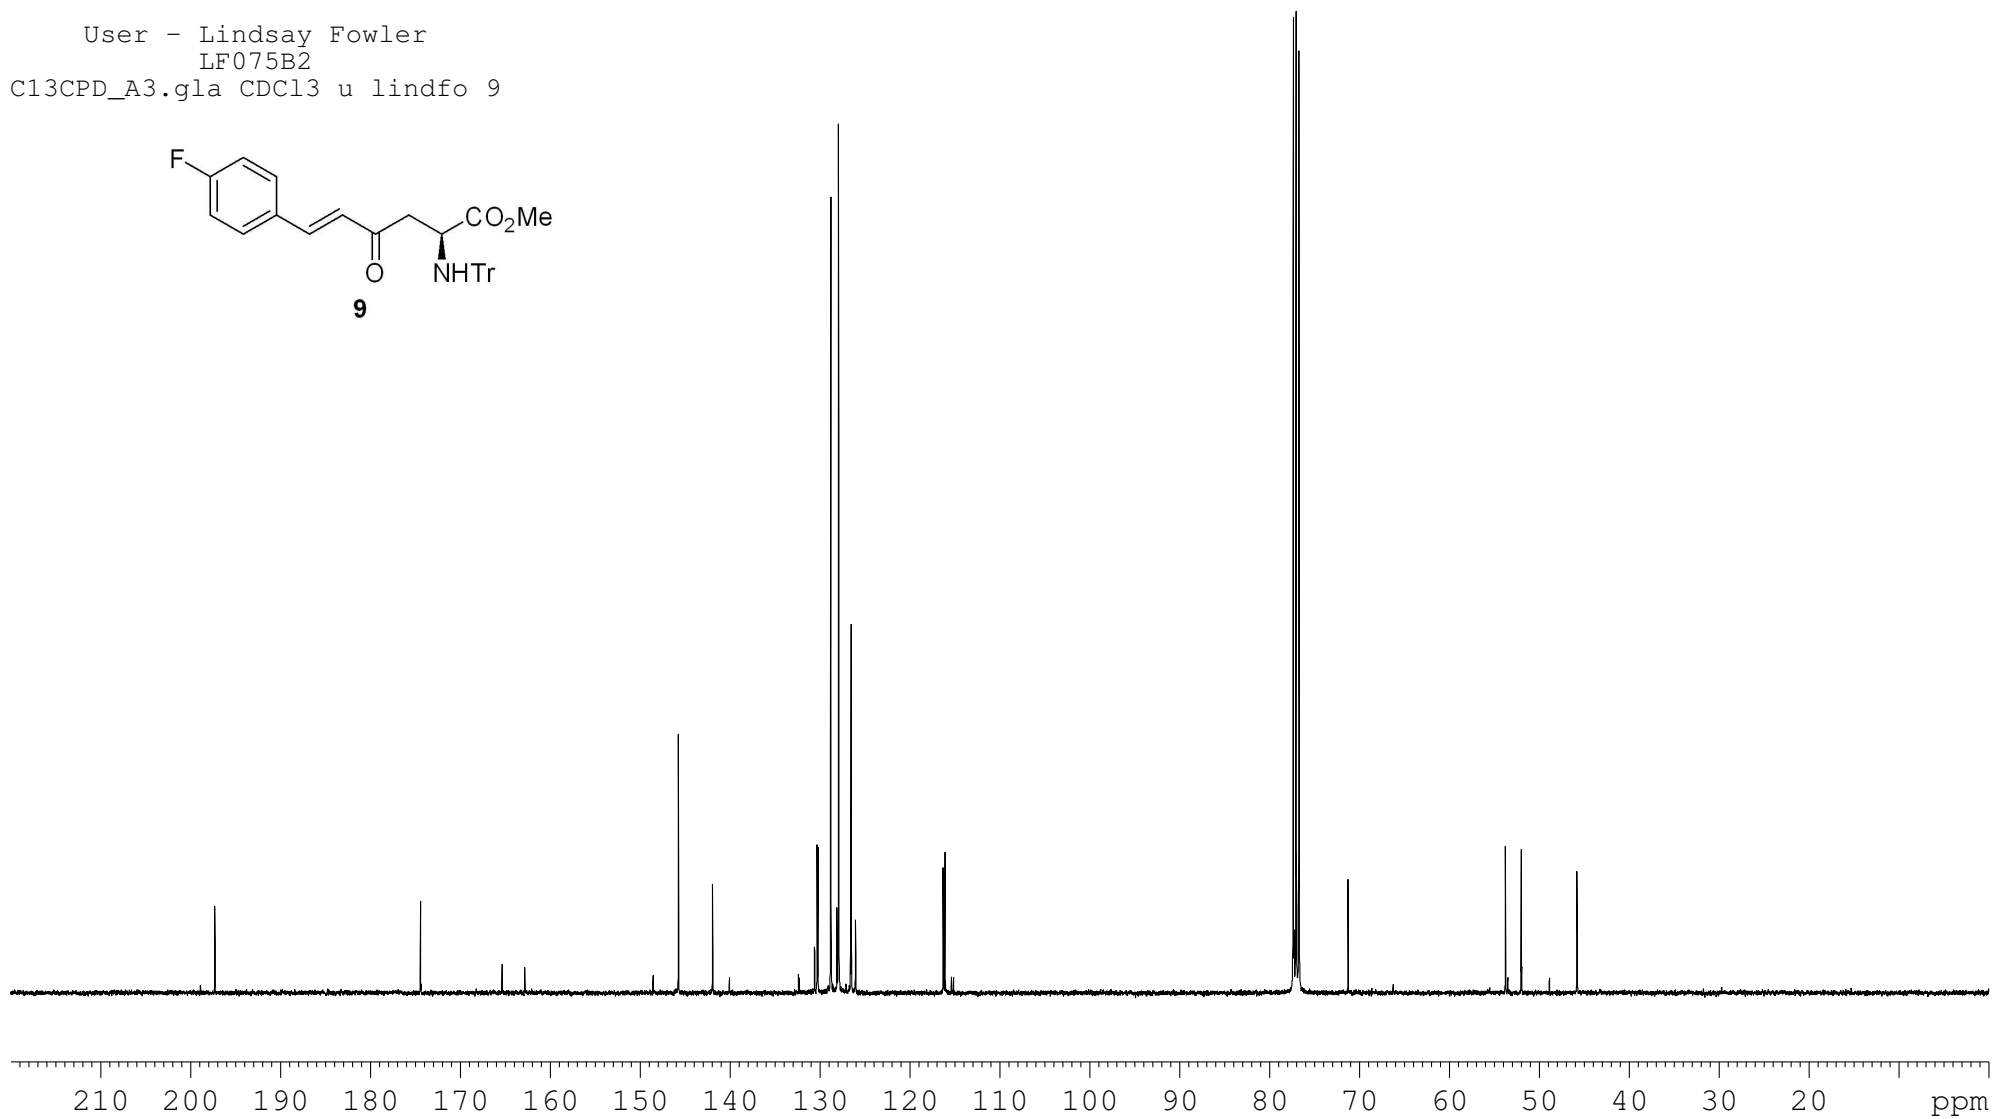



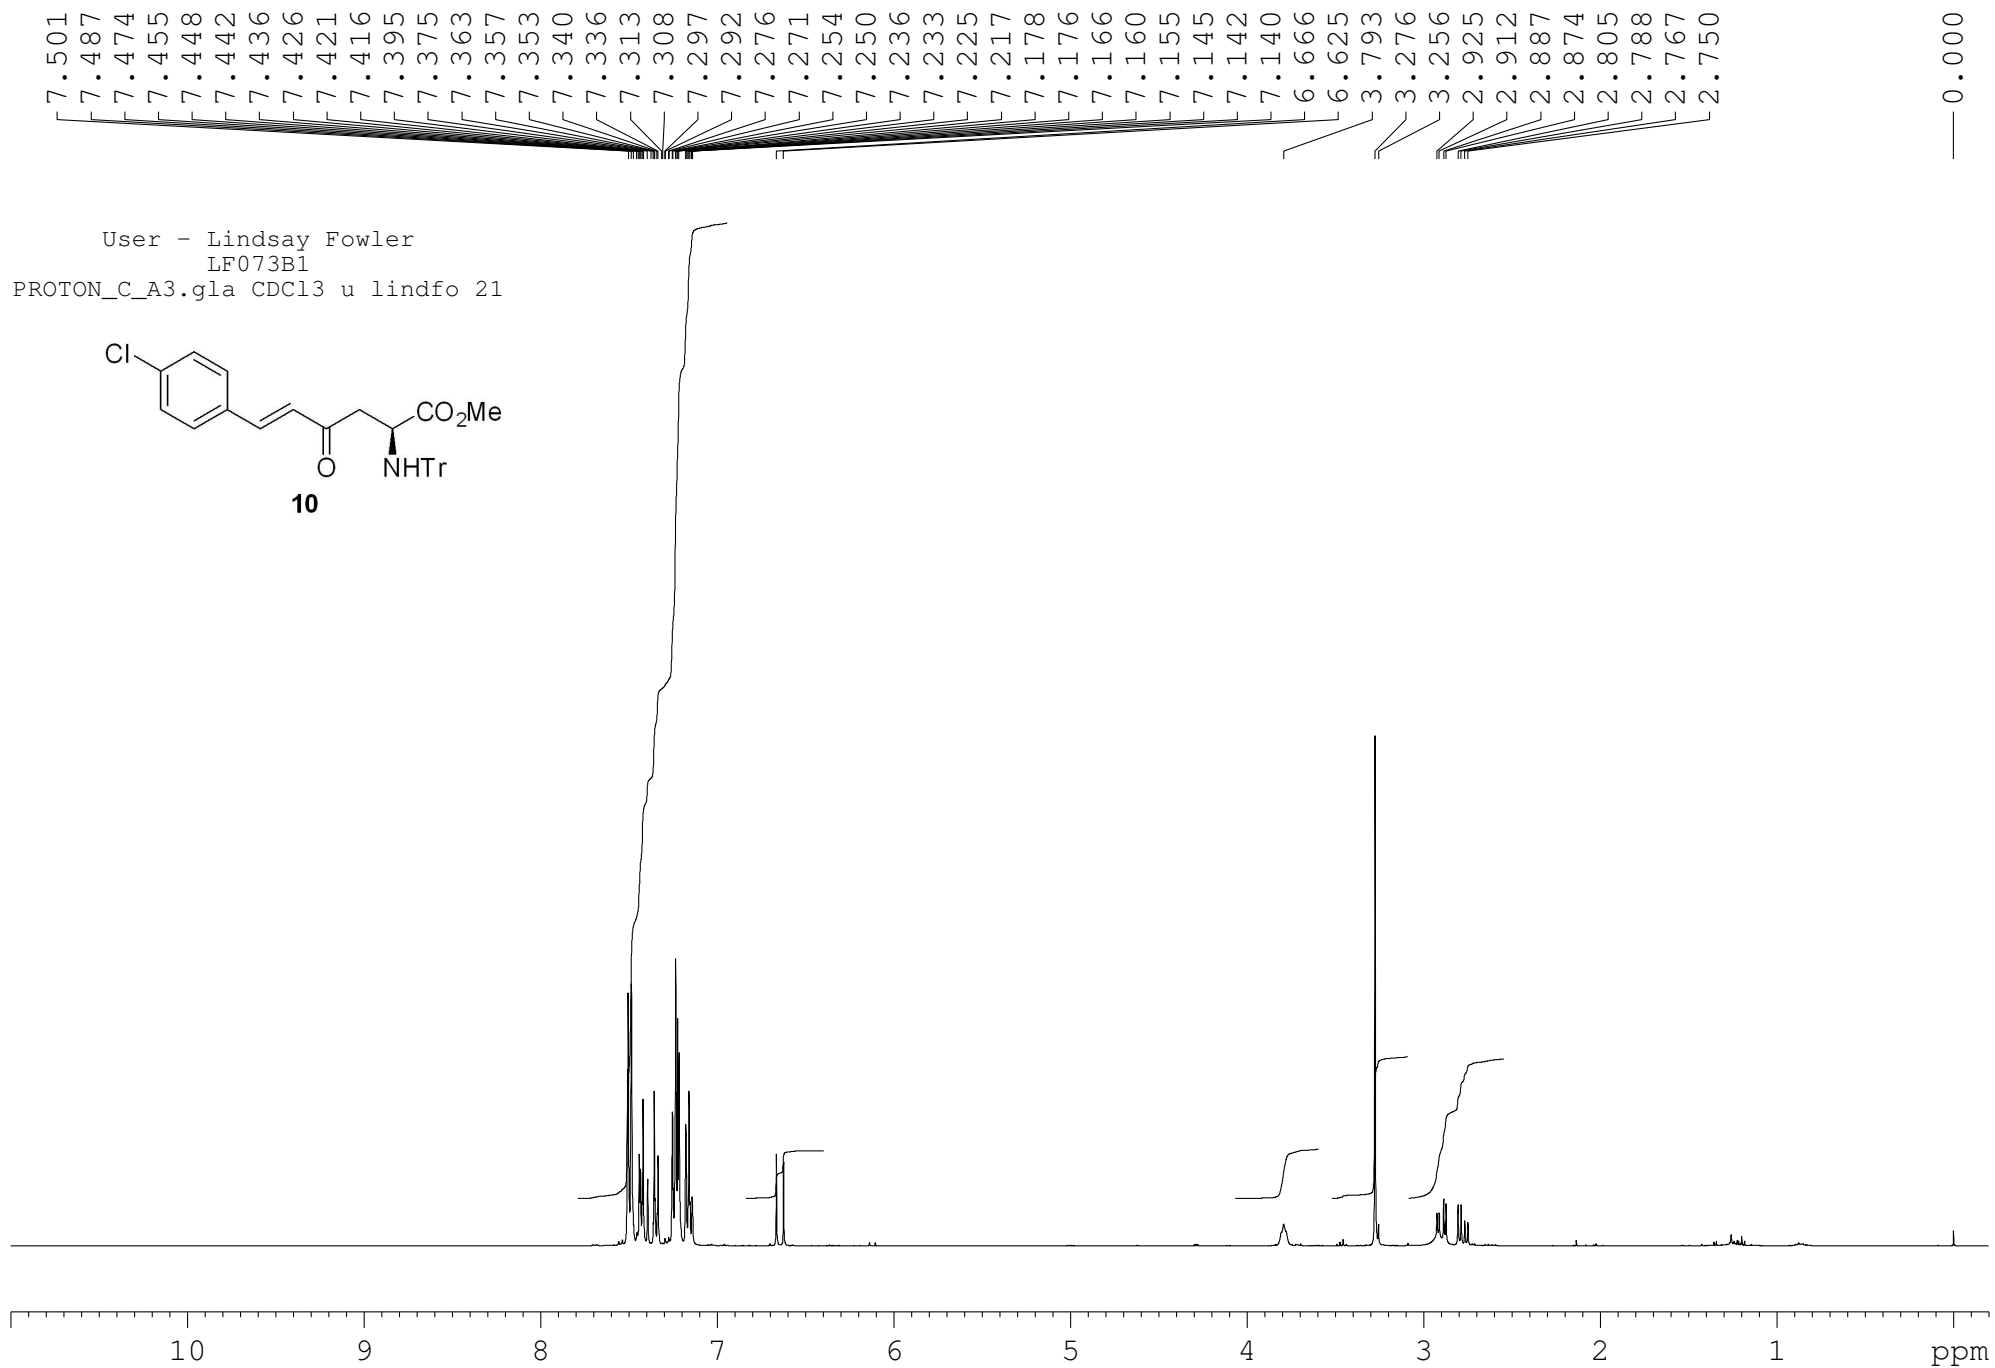

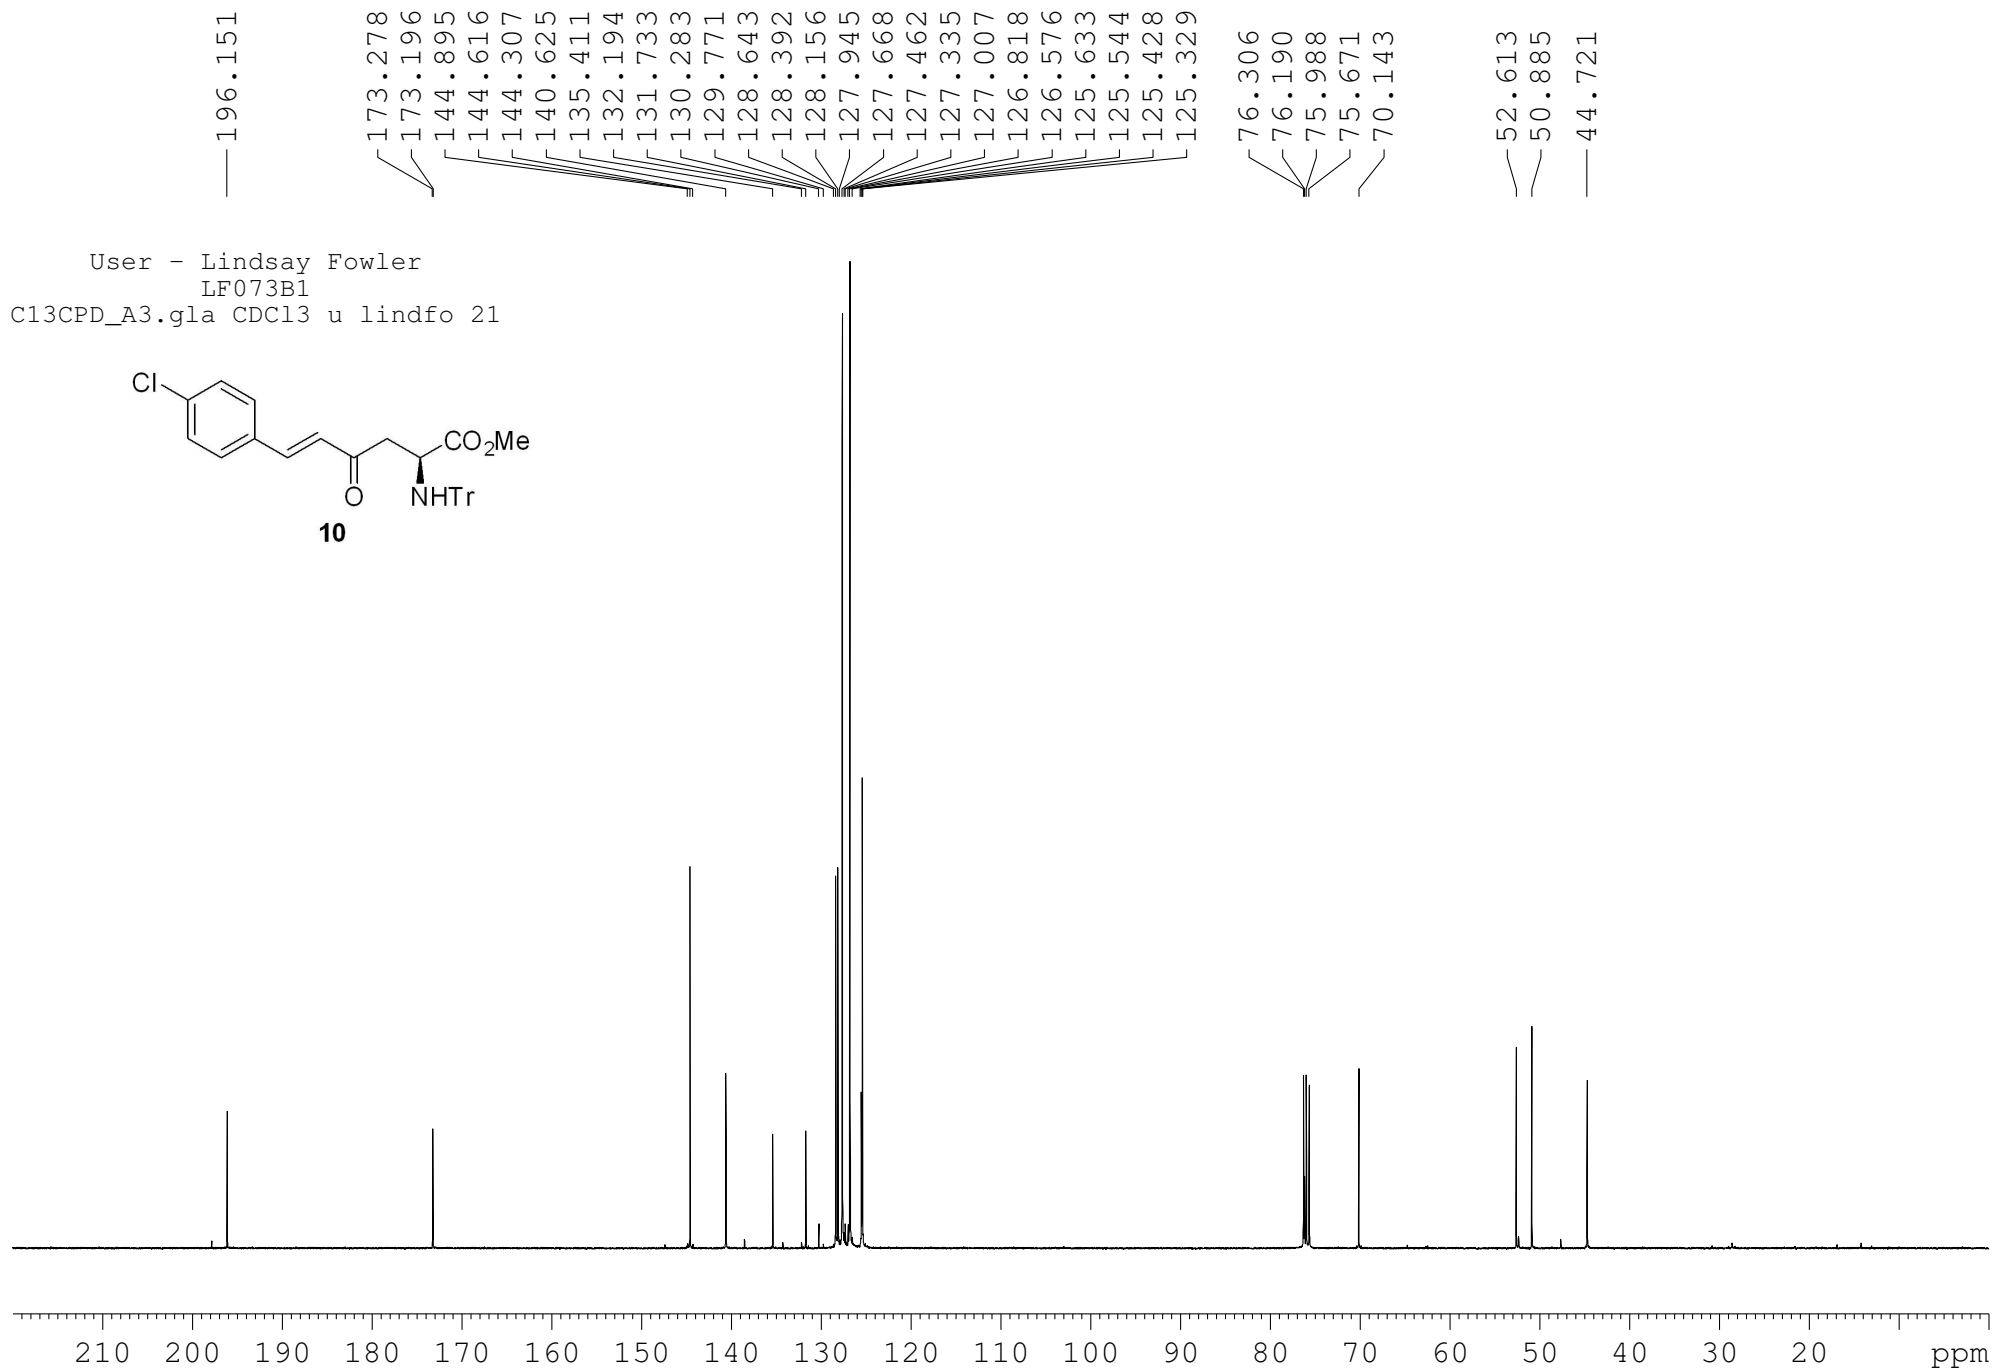

7.547  
7.526  
7.501  
7.482  
7.451  
7.421  
7.395  
7.375  
7.260  
7.248  
7.229  
7.194  
7.176  
7.158  
6.682  
6.641

3.811  
3.795  
3.774  
3.758  
3.285  
3.266  
2.921  
2.898  
2.880  
2.868  
2.800  
2.782  
2.761  
2.744

— 0.000

User - Lindsay Fowler  
LF074B1  
PROTON\_C\_A3.gla CDCl3 u lindfo 38

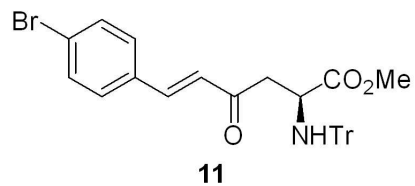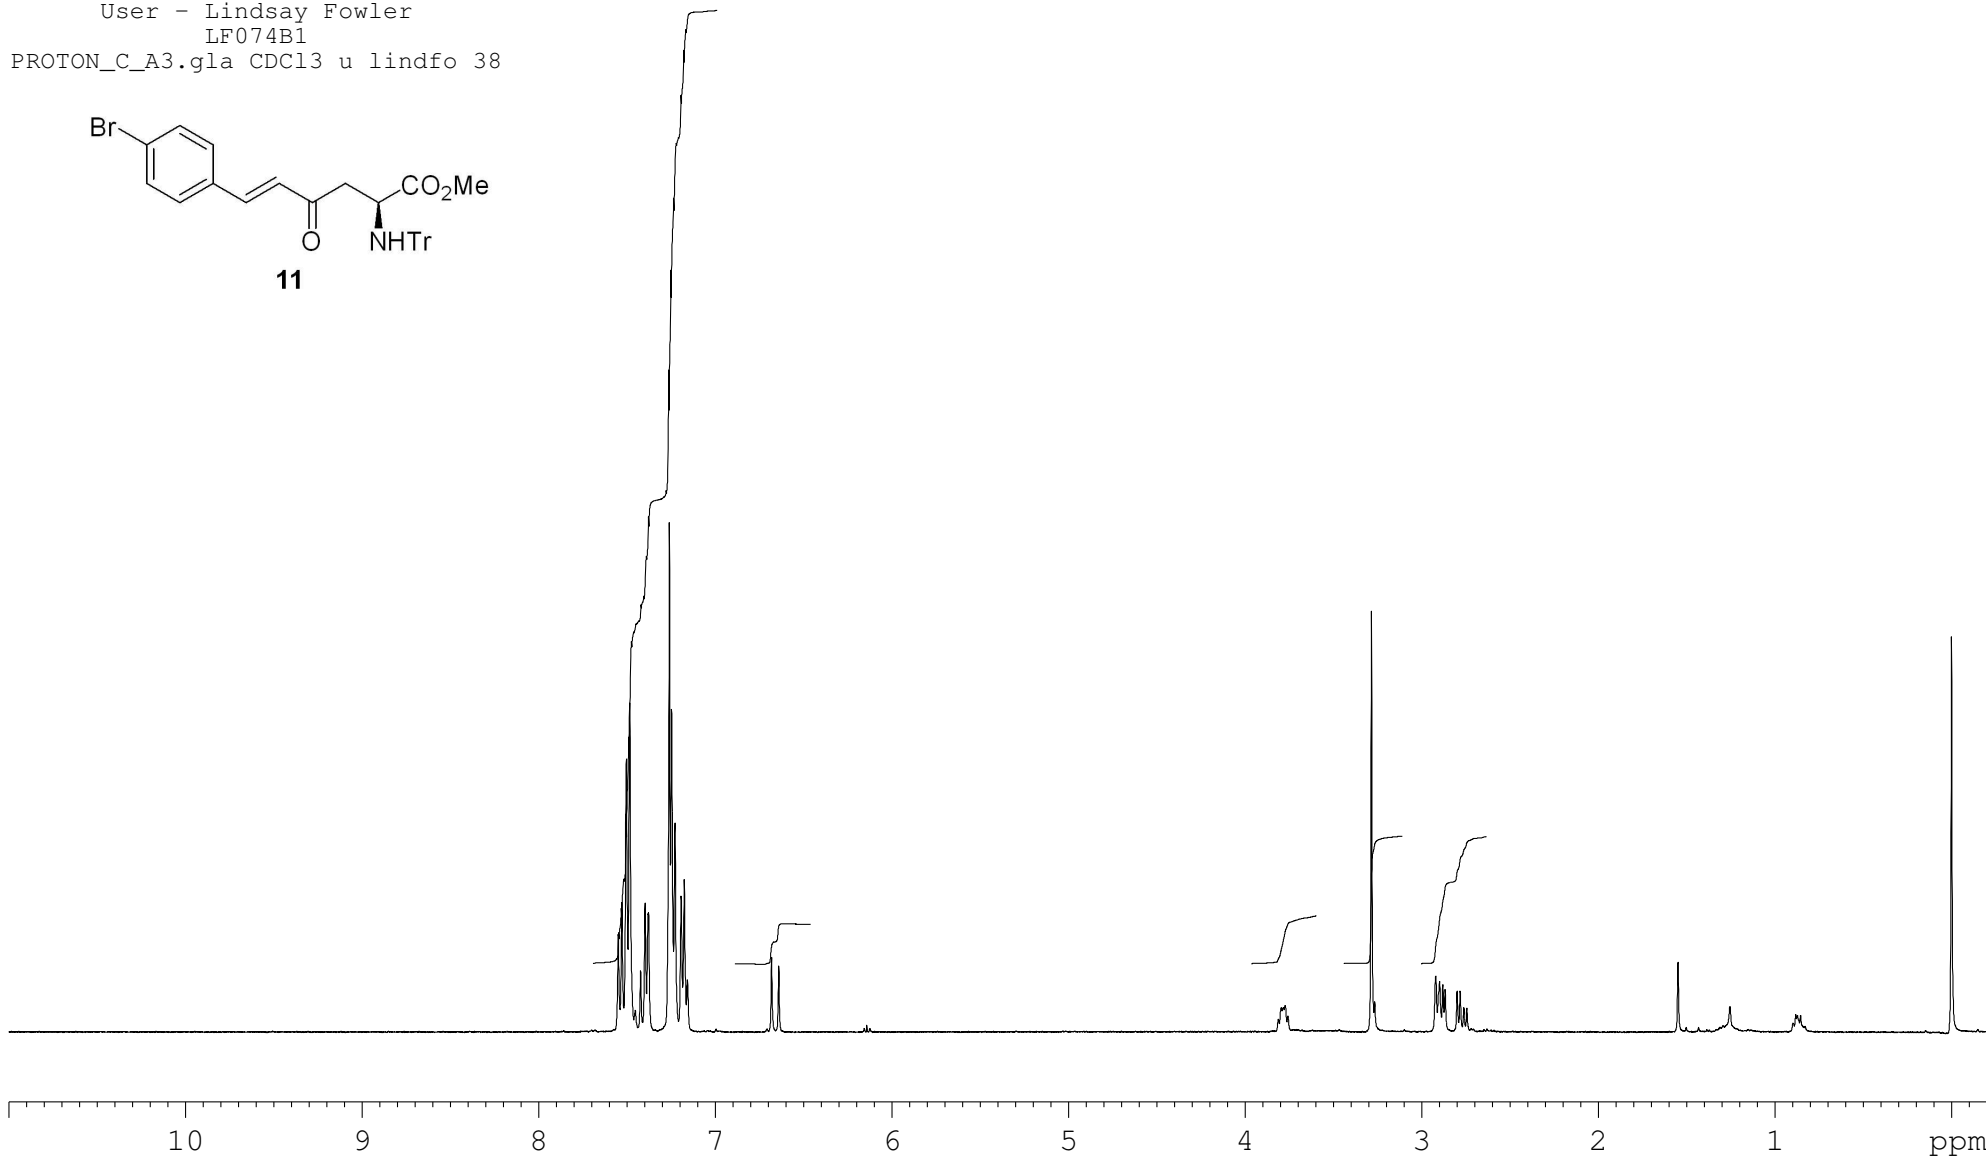

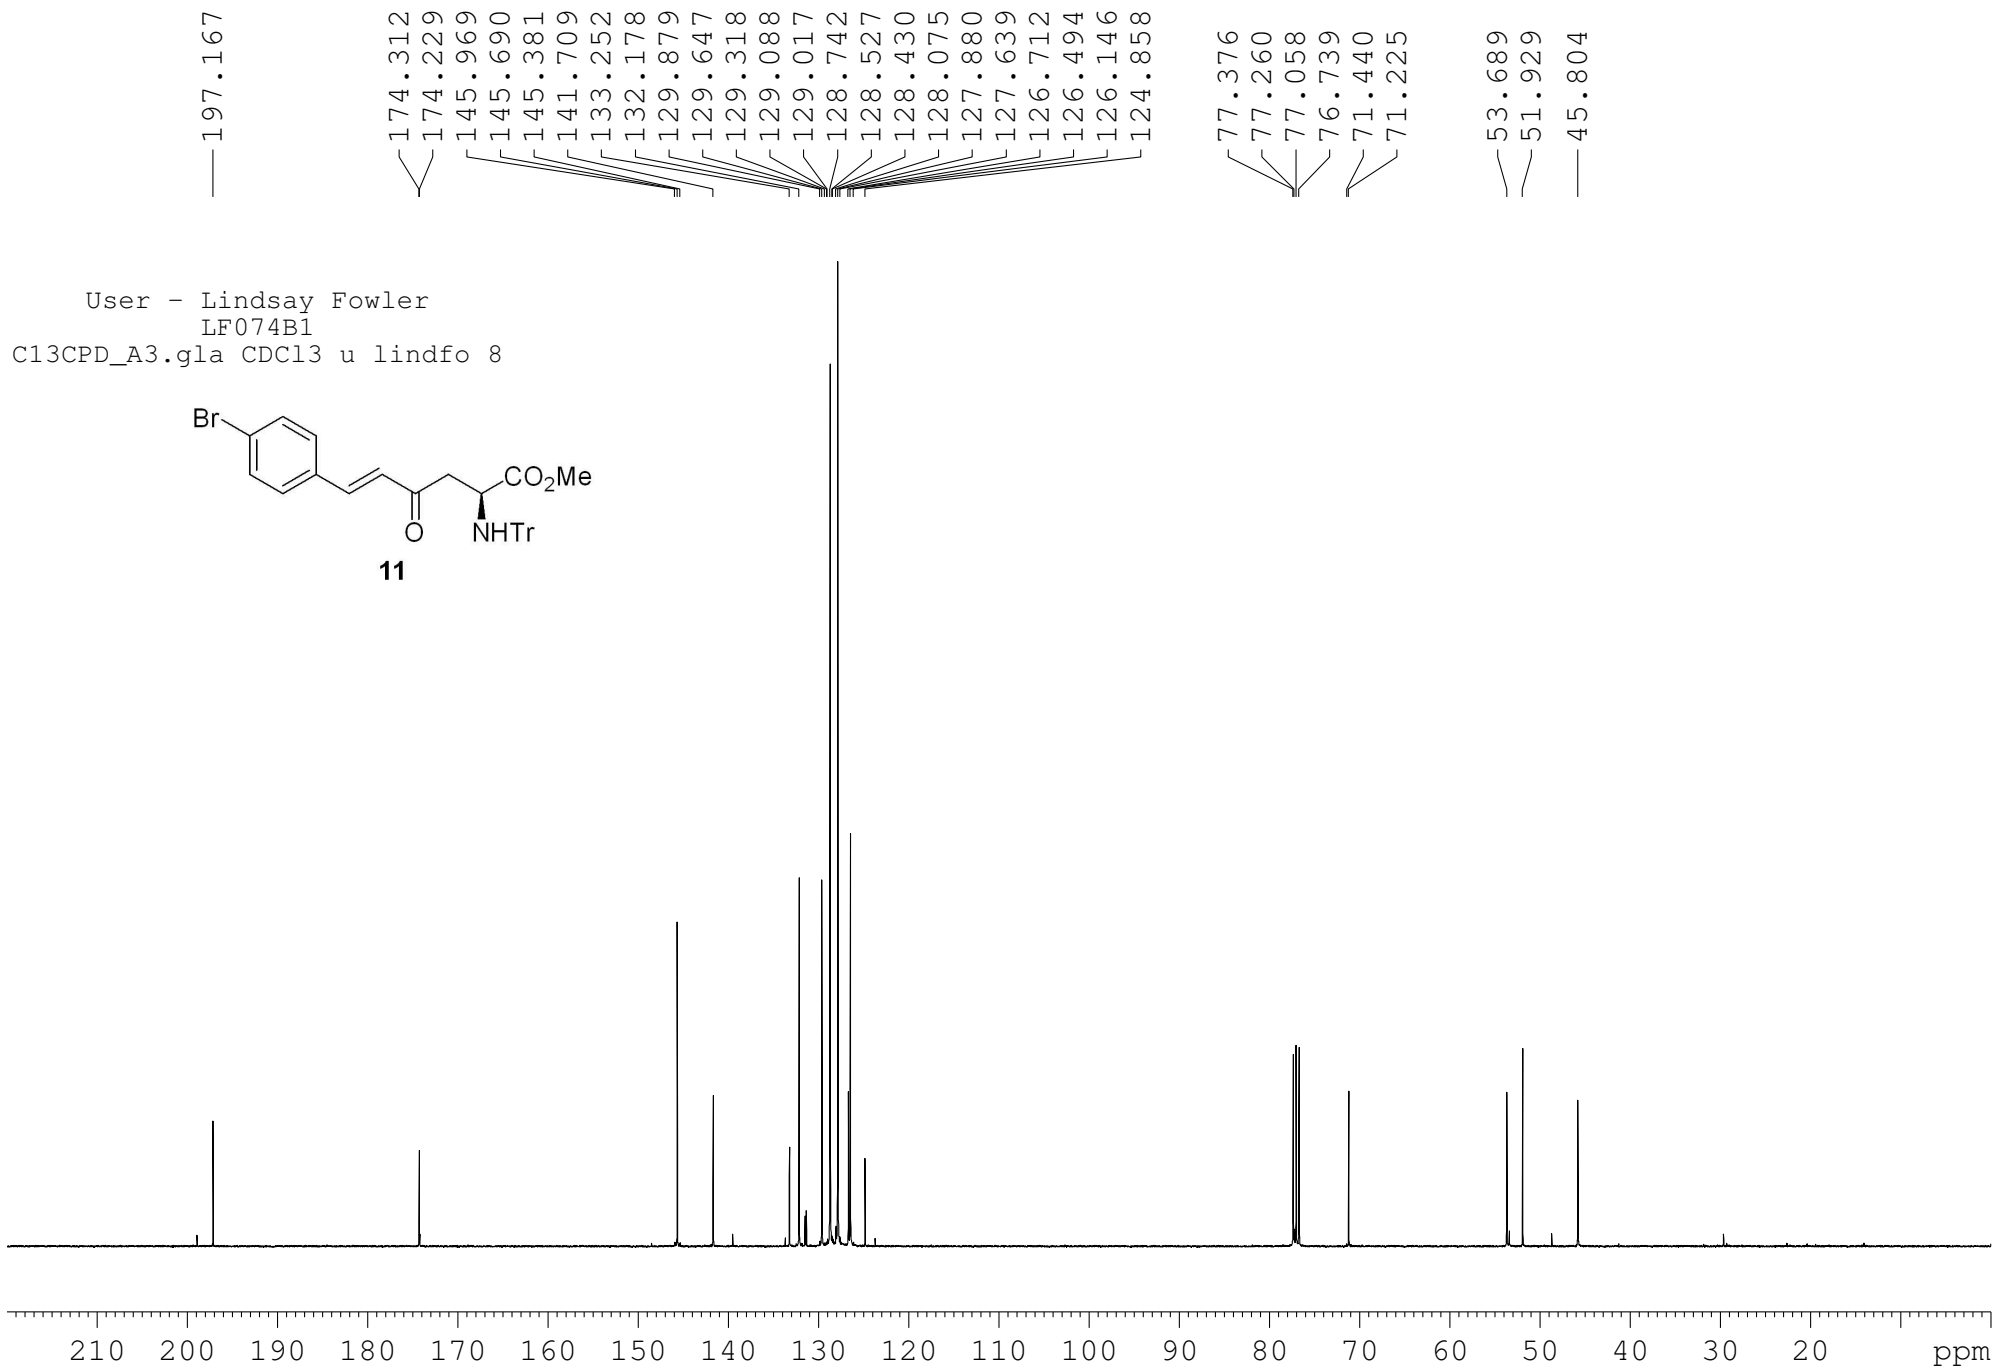

7.833  
7.609  
7.607  
7.590  
7.587  
7.571  
7.567  
7.518  
7.515  
7.497  
7.455  
7.451  
7.433  
7.321  
7.319  
7.302  
7.301  
7.283  
7.281  
7.257  
7.253  
7.239  
7.229  
7.222  
7.220  
7.209  
7.205  
7.190  
7.186  
7.176  
7.173  
7.162  
7.157  
7.152  
7.142  
7.139  
7.139  
6.615  
6.574  
3.813  
3.801  
3.300  
2.946  
2.933  
2.908  
2.894  
2.844  
2.827  
2.805  
2.788

User - Lindsay Fowler  
LF119B1  
PROTON\_C\_A3.gla CDCl3 u lindfo 11

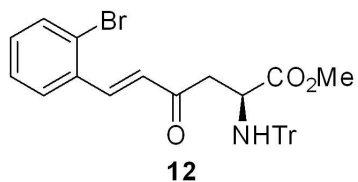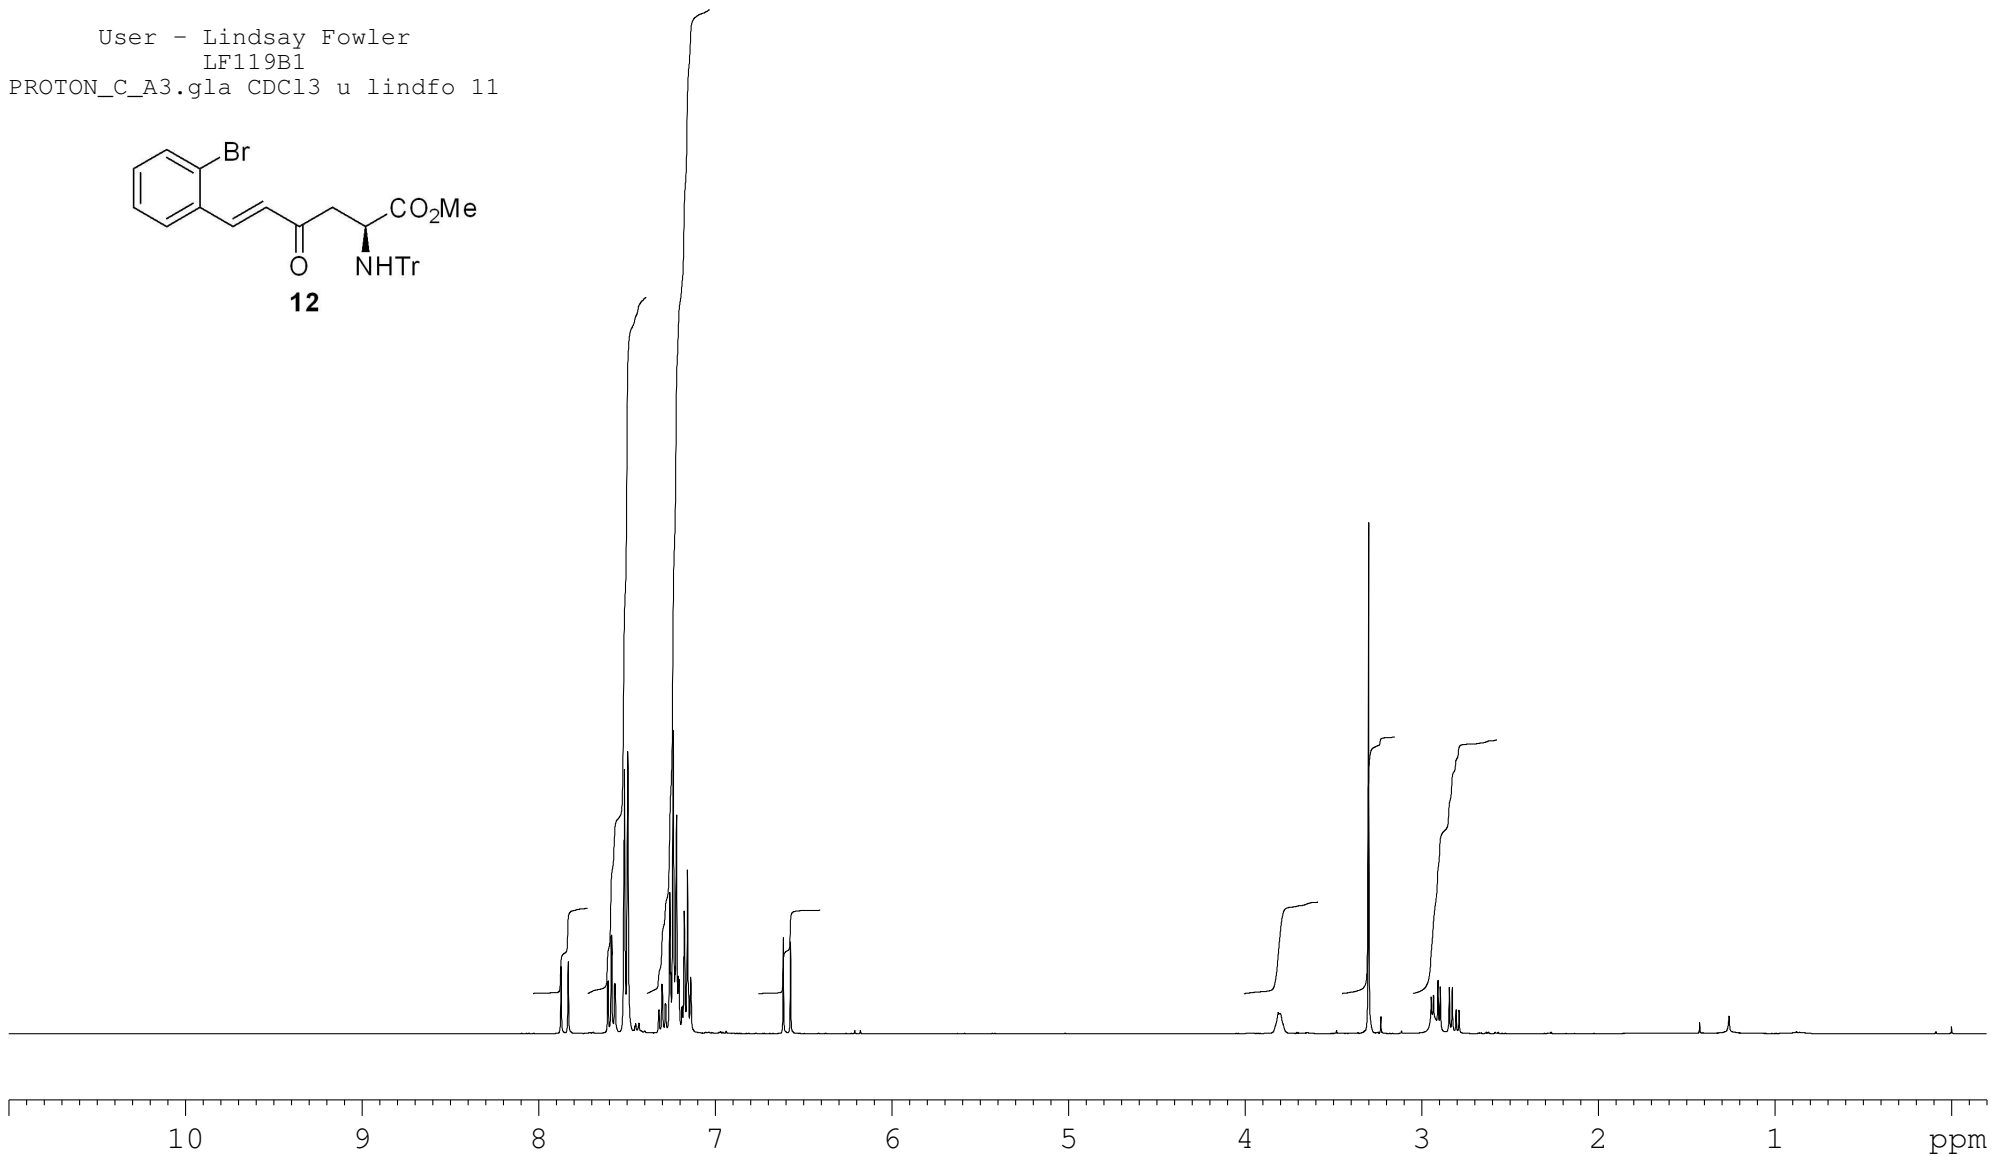

— 197.512

— 174.437

145.810  
141.661  
134.407  
133.575  
131.598  
129.094  
128.870  
128.305  
128.193  
127.995  
127.943  
127.869  
127.820  
126.611  
126.263  
125.869

77.490  
77.374  
77.172  
76.853  
71.340

53.779  
52.079  
51.974  
45.321

User - Lindsay Fowler  
LF119B1  
C13CPD\_A3.gla CDC13 u lindfo 4

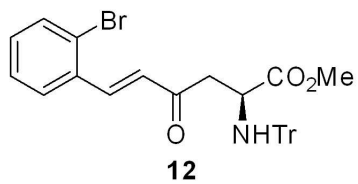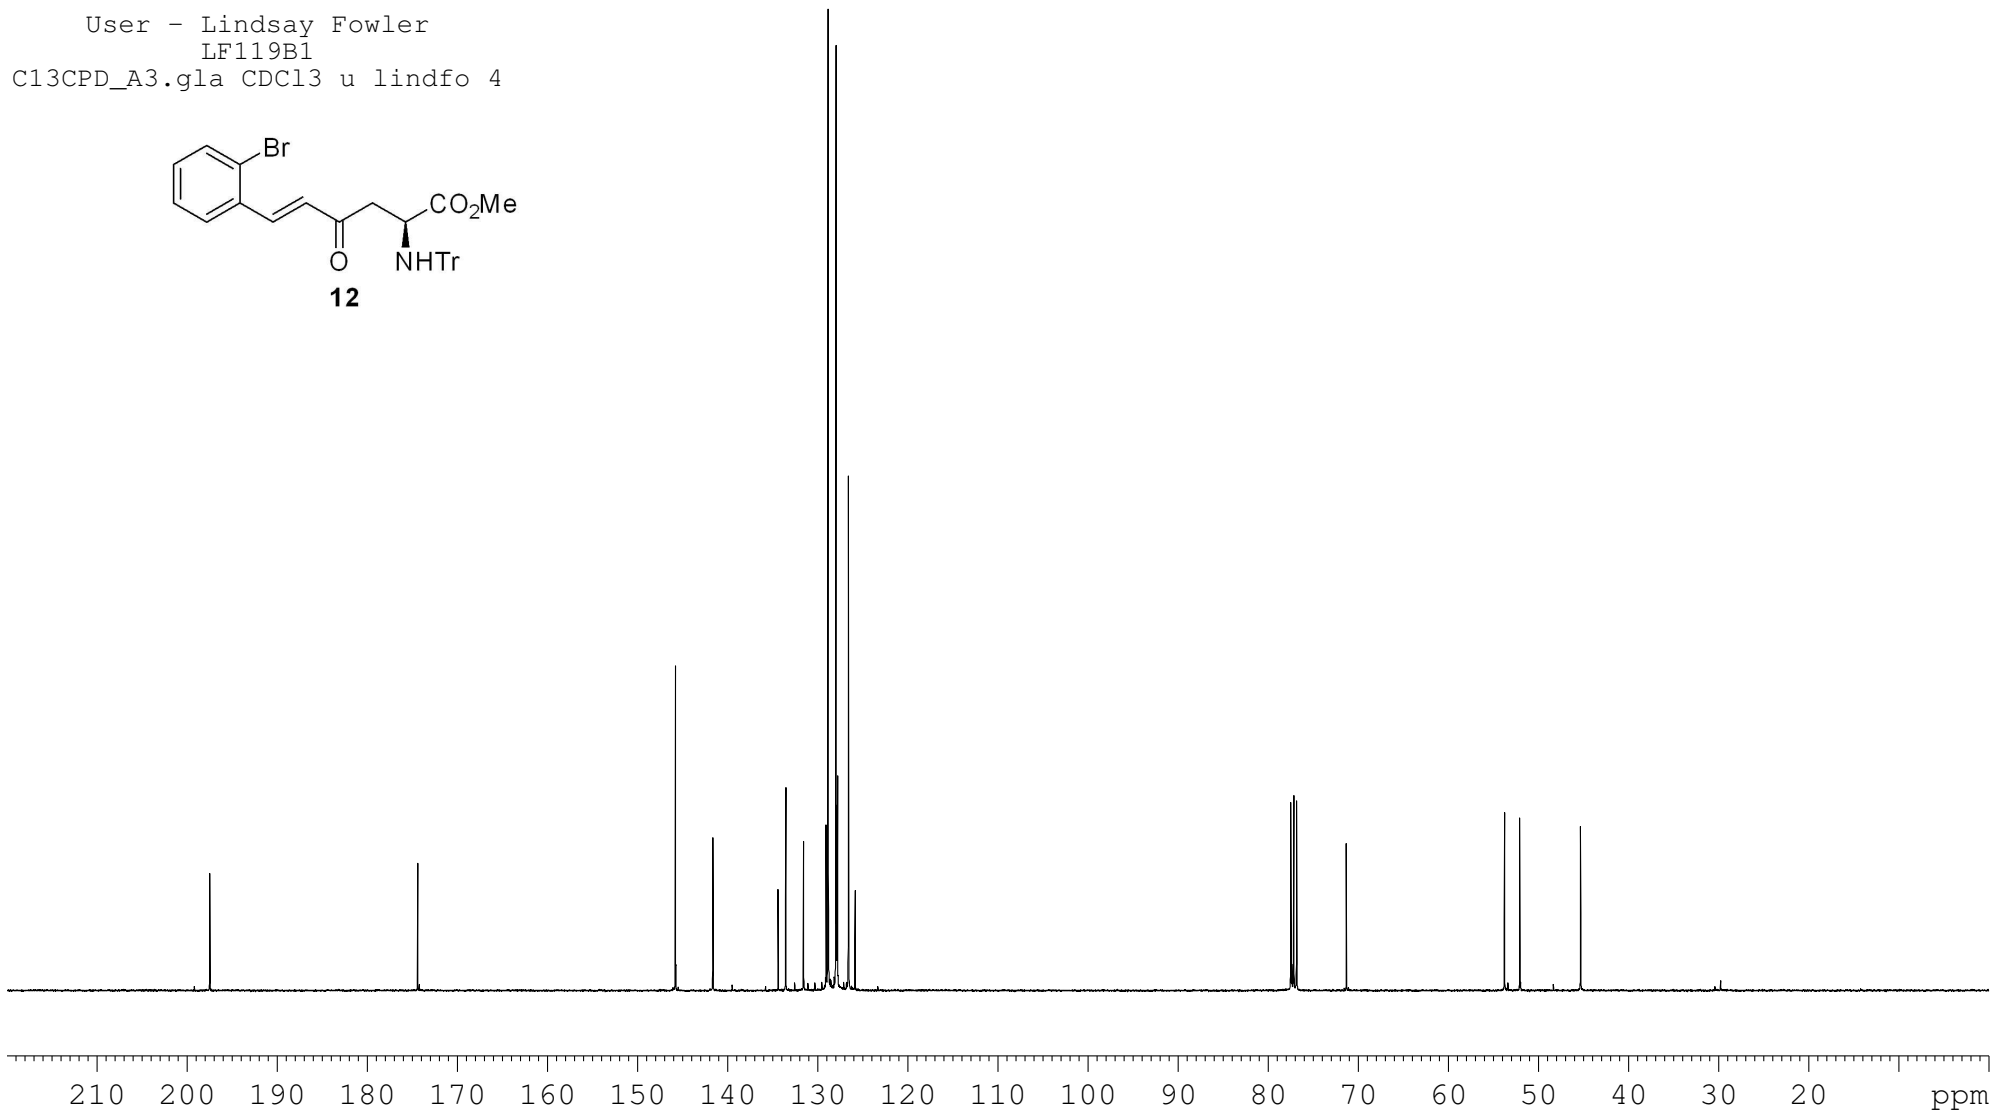

8.367  
8.242  
8.221  
7.814  
7.795  
7.590  
7.570  
7.551  
7.511  
7.492  
7.466  
7.273  
7.255  
7.236  
7.200  
7.182  
7.164  
6.792  
6.752

3.840  
3.804  
3.315  
2.967  
2.948  
2.935  
2.909  
2.897  
2.817  
2.799  
2.778  
2.761

— 0.000

User - Lindsay Fowler  
LF076B1  
PROTON\_C\_A3.gla CDCl3 u lindfo 36

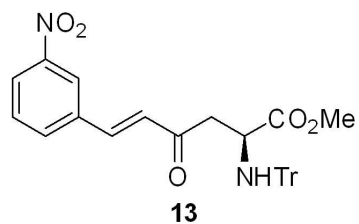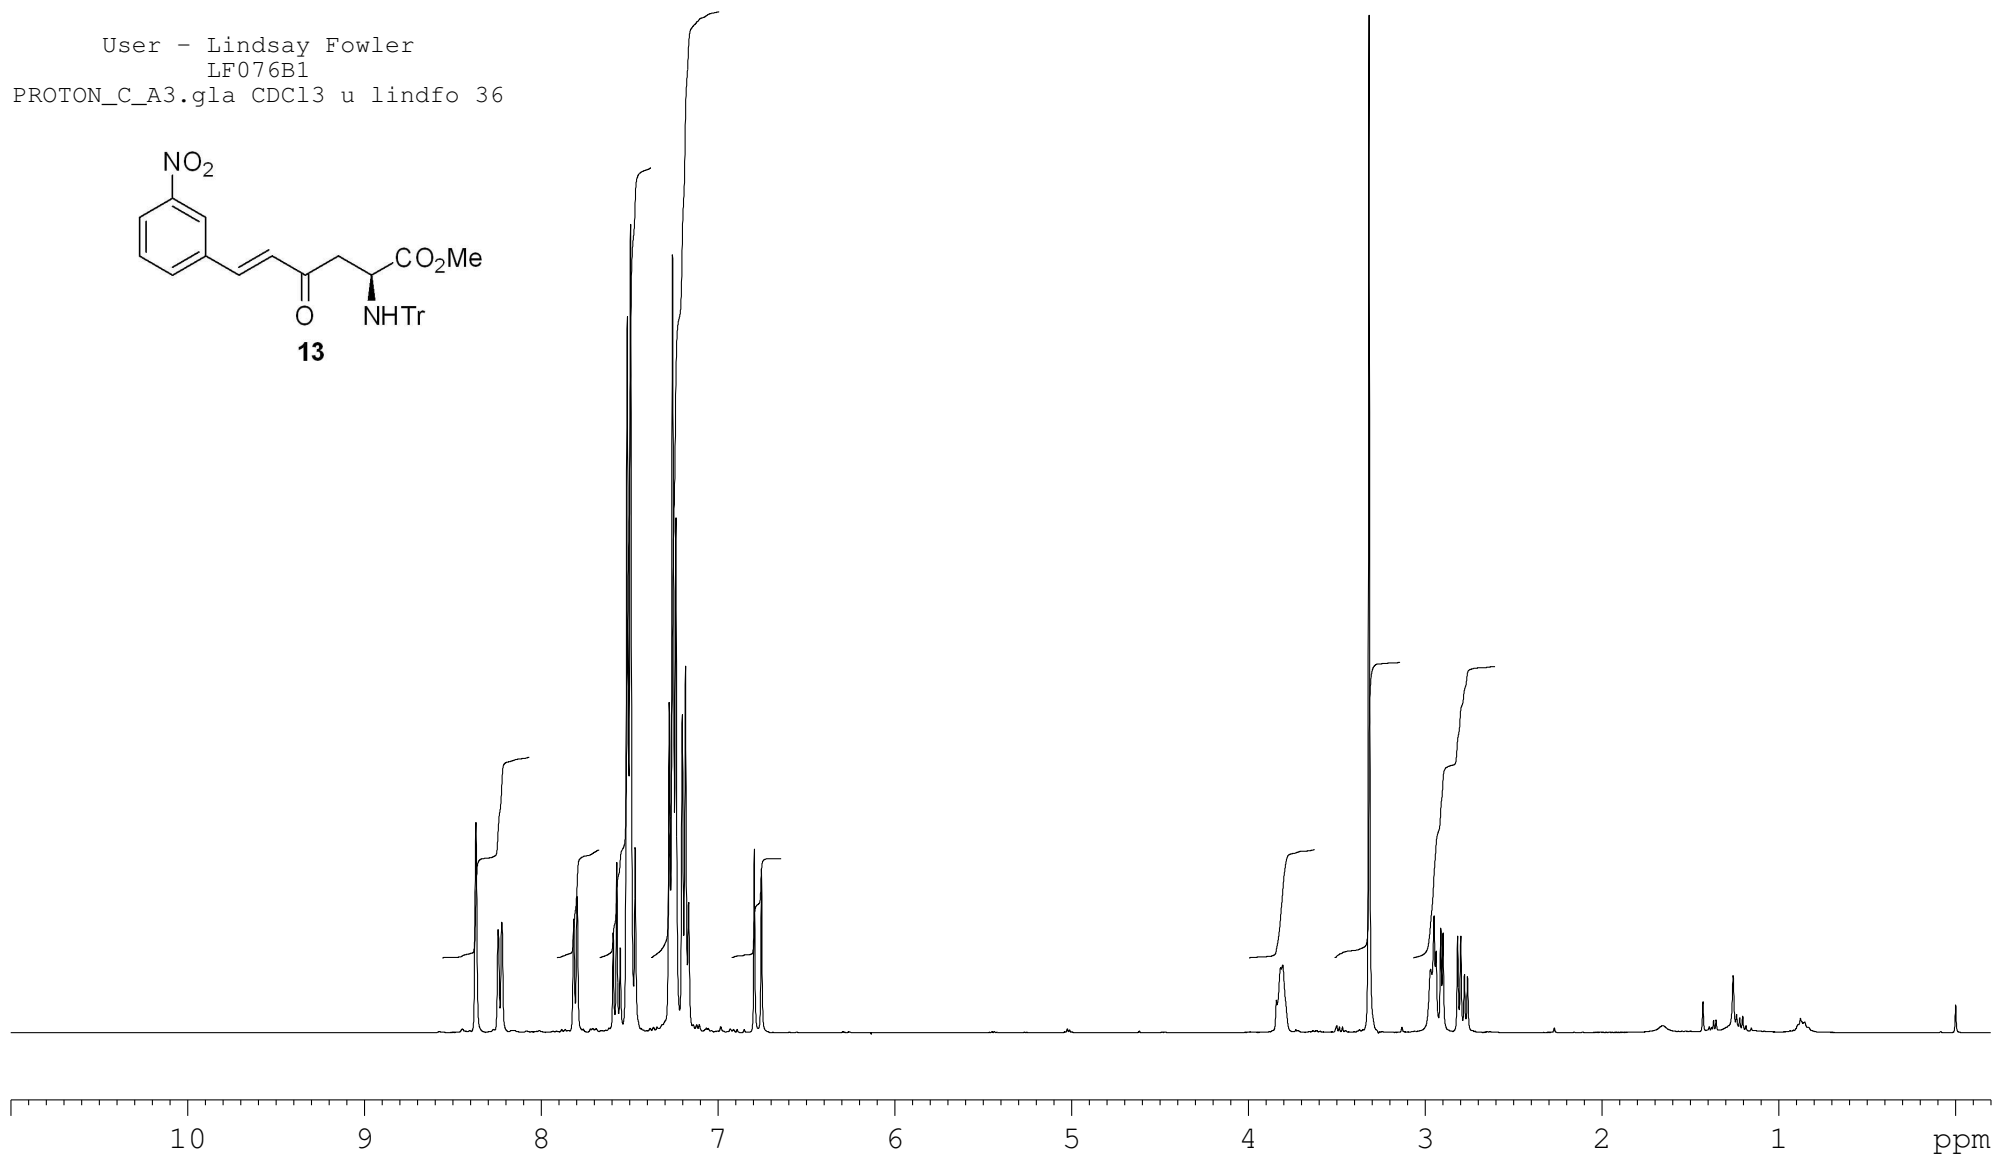

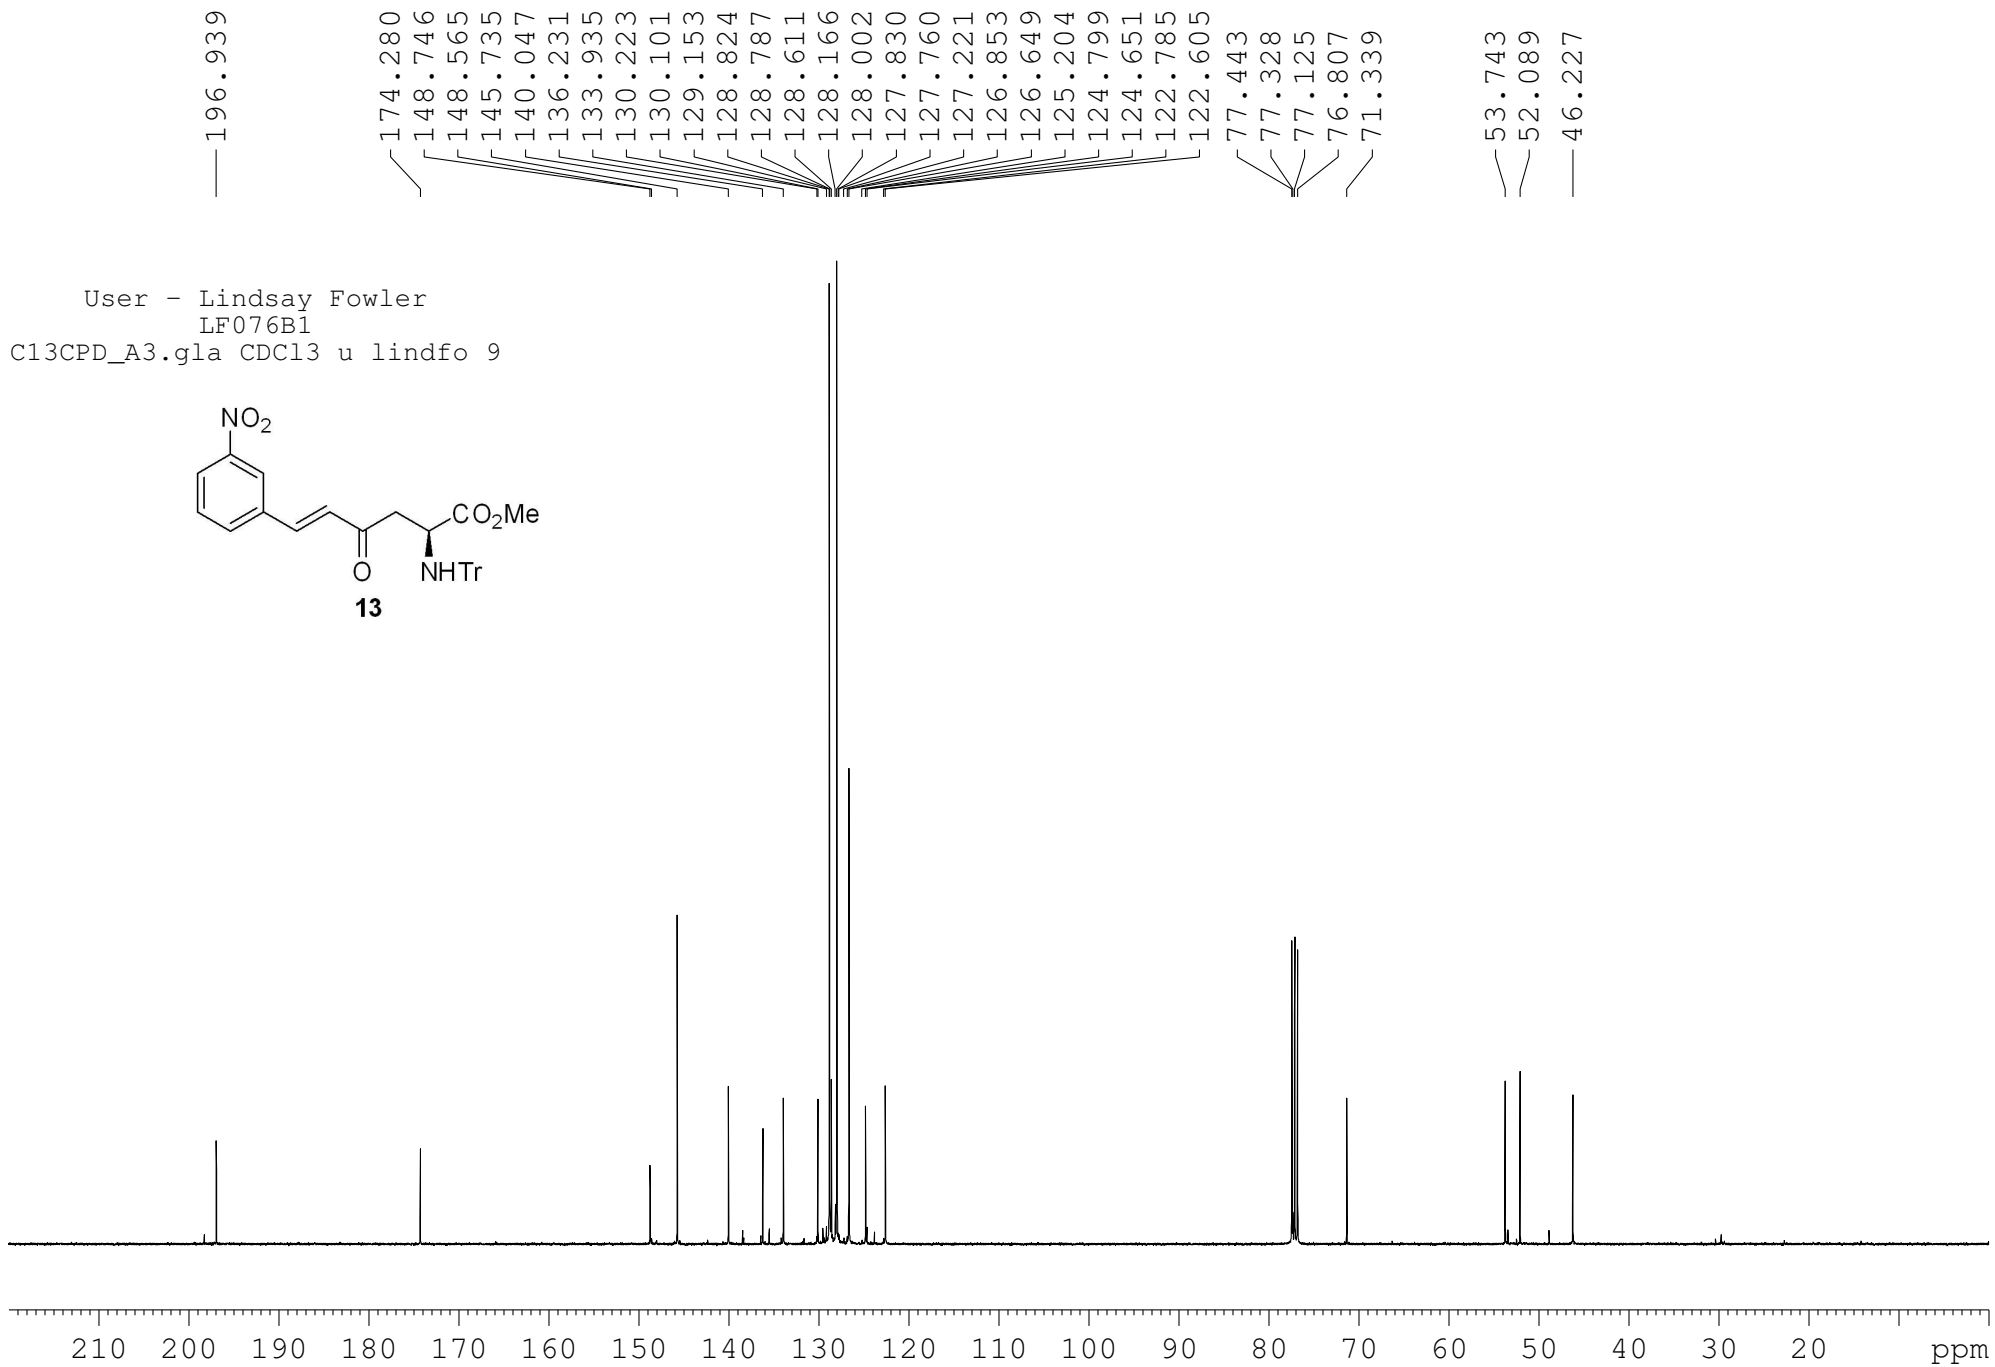



7.560  
7.527  
7.511  
7.492  
7.462  
7.448  
7.427  
7.398  
7.359  
7.340  
7.321  
7.305  
7.286  
7.257  
7.239  
7.220  
7.195  
7.179  
7.161  
7.143  
6.751  
6.723  
6.716  
6.707  
6.676  
5.808  
5.764  
5.325  
5.298  
3.797  
3.274  
3.236  
2.951  
2.938  
2.914  
2.901  
2.819  
2.801  
2.781  
2.764

— 0.000

User - Lindsay Fowler  
LF077B1  
PROTON\_C\_A3.gla CDCl3 u lindfo 1

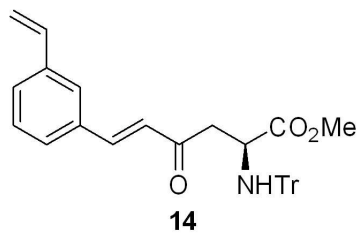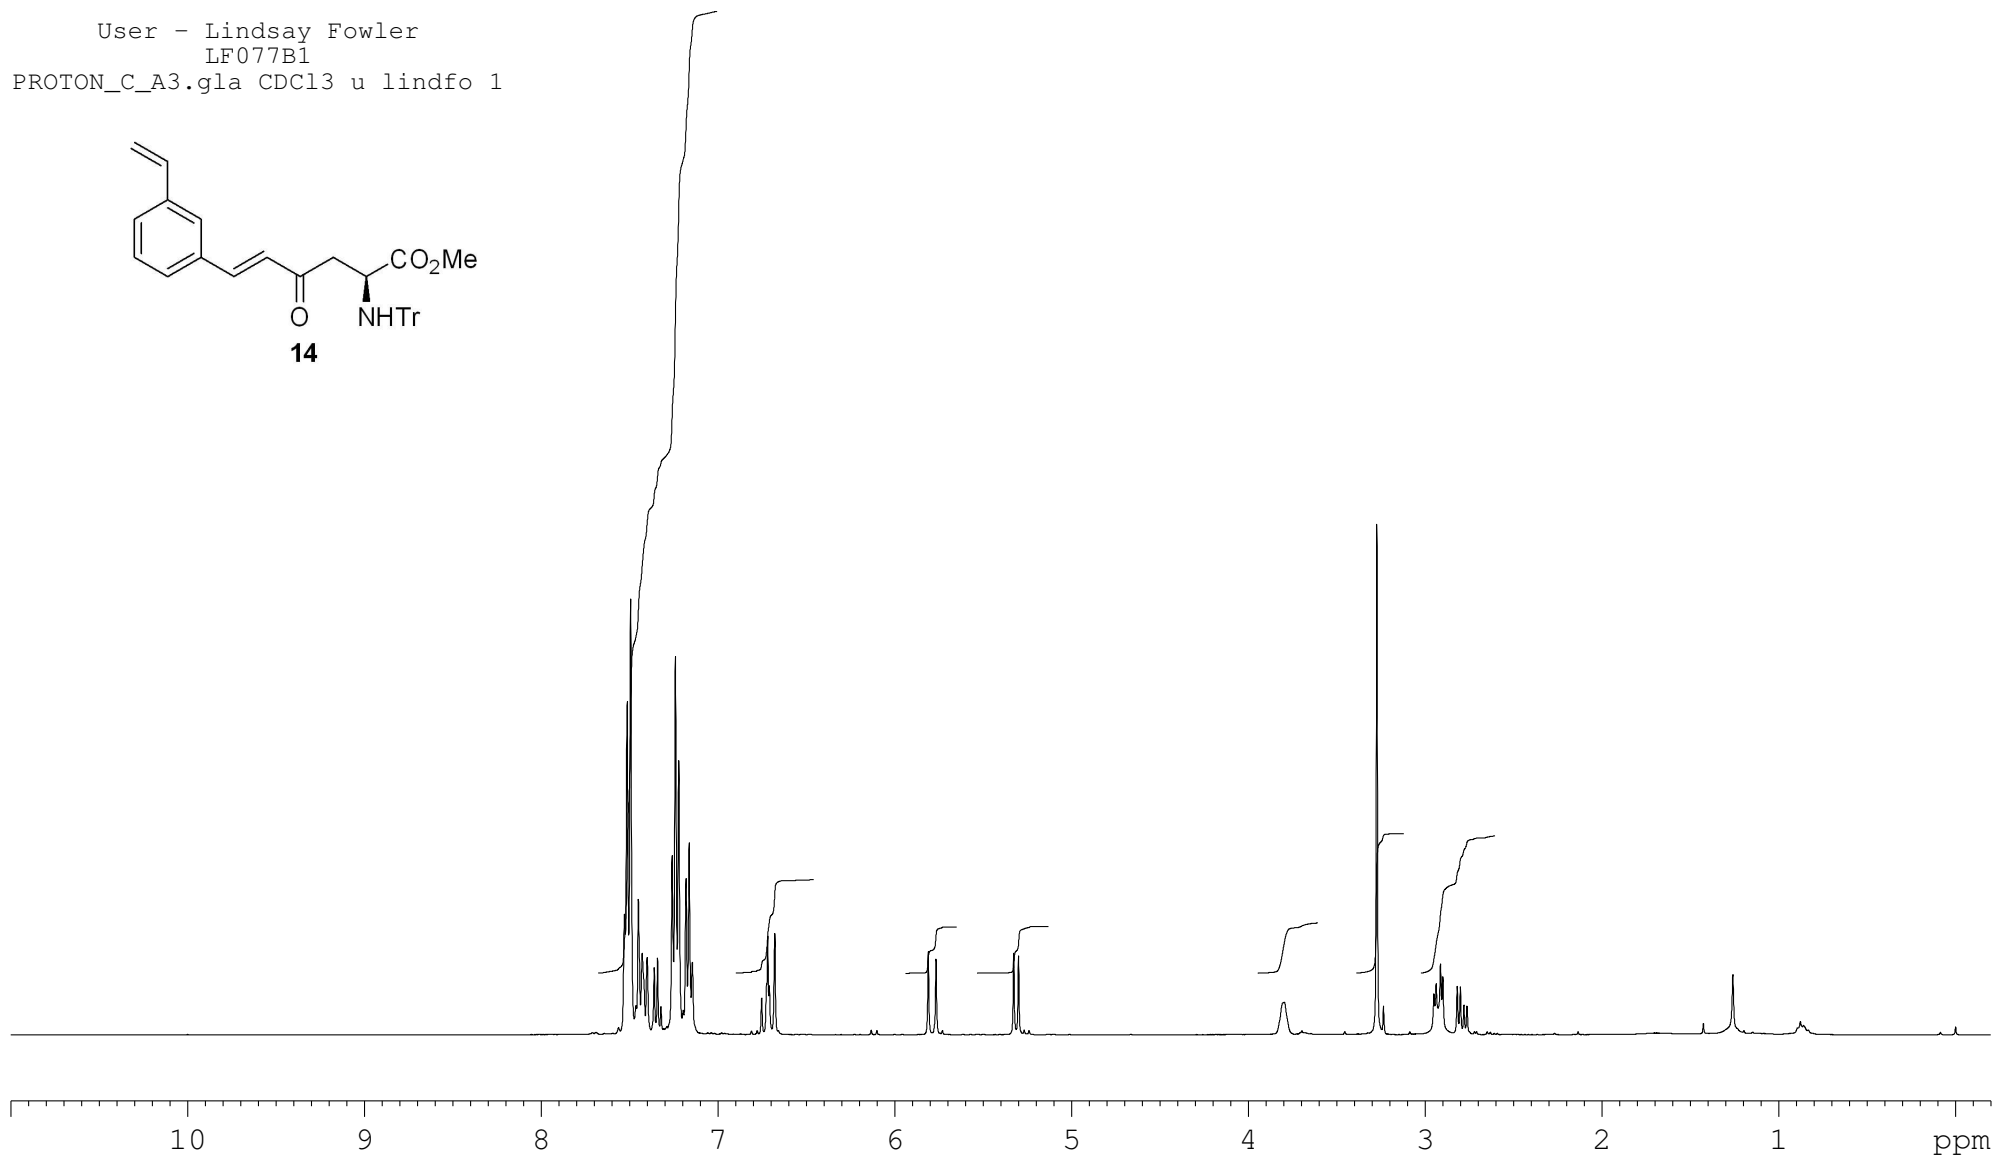

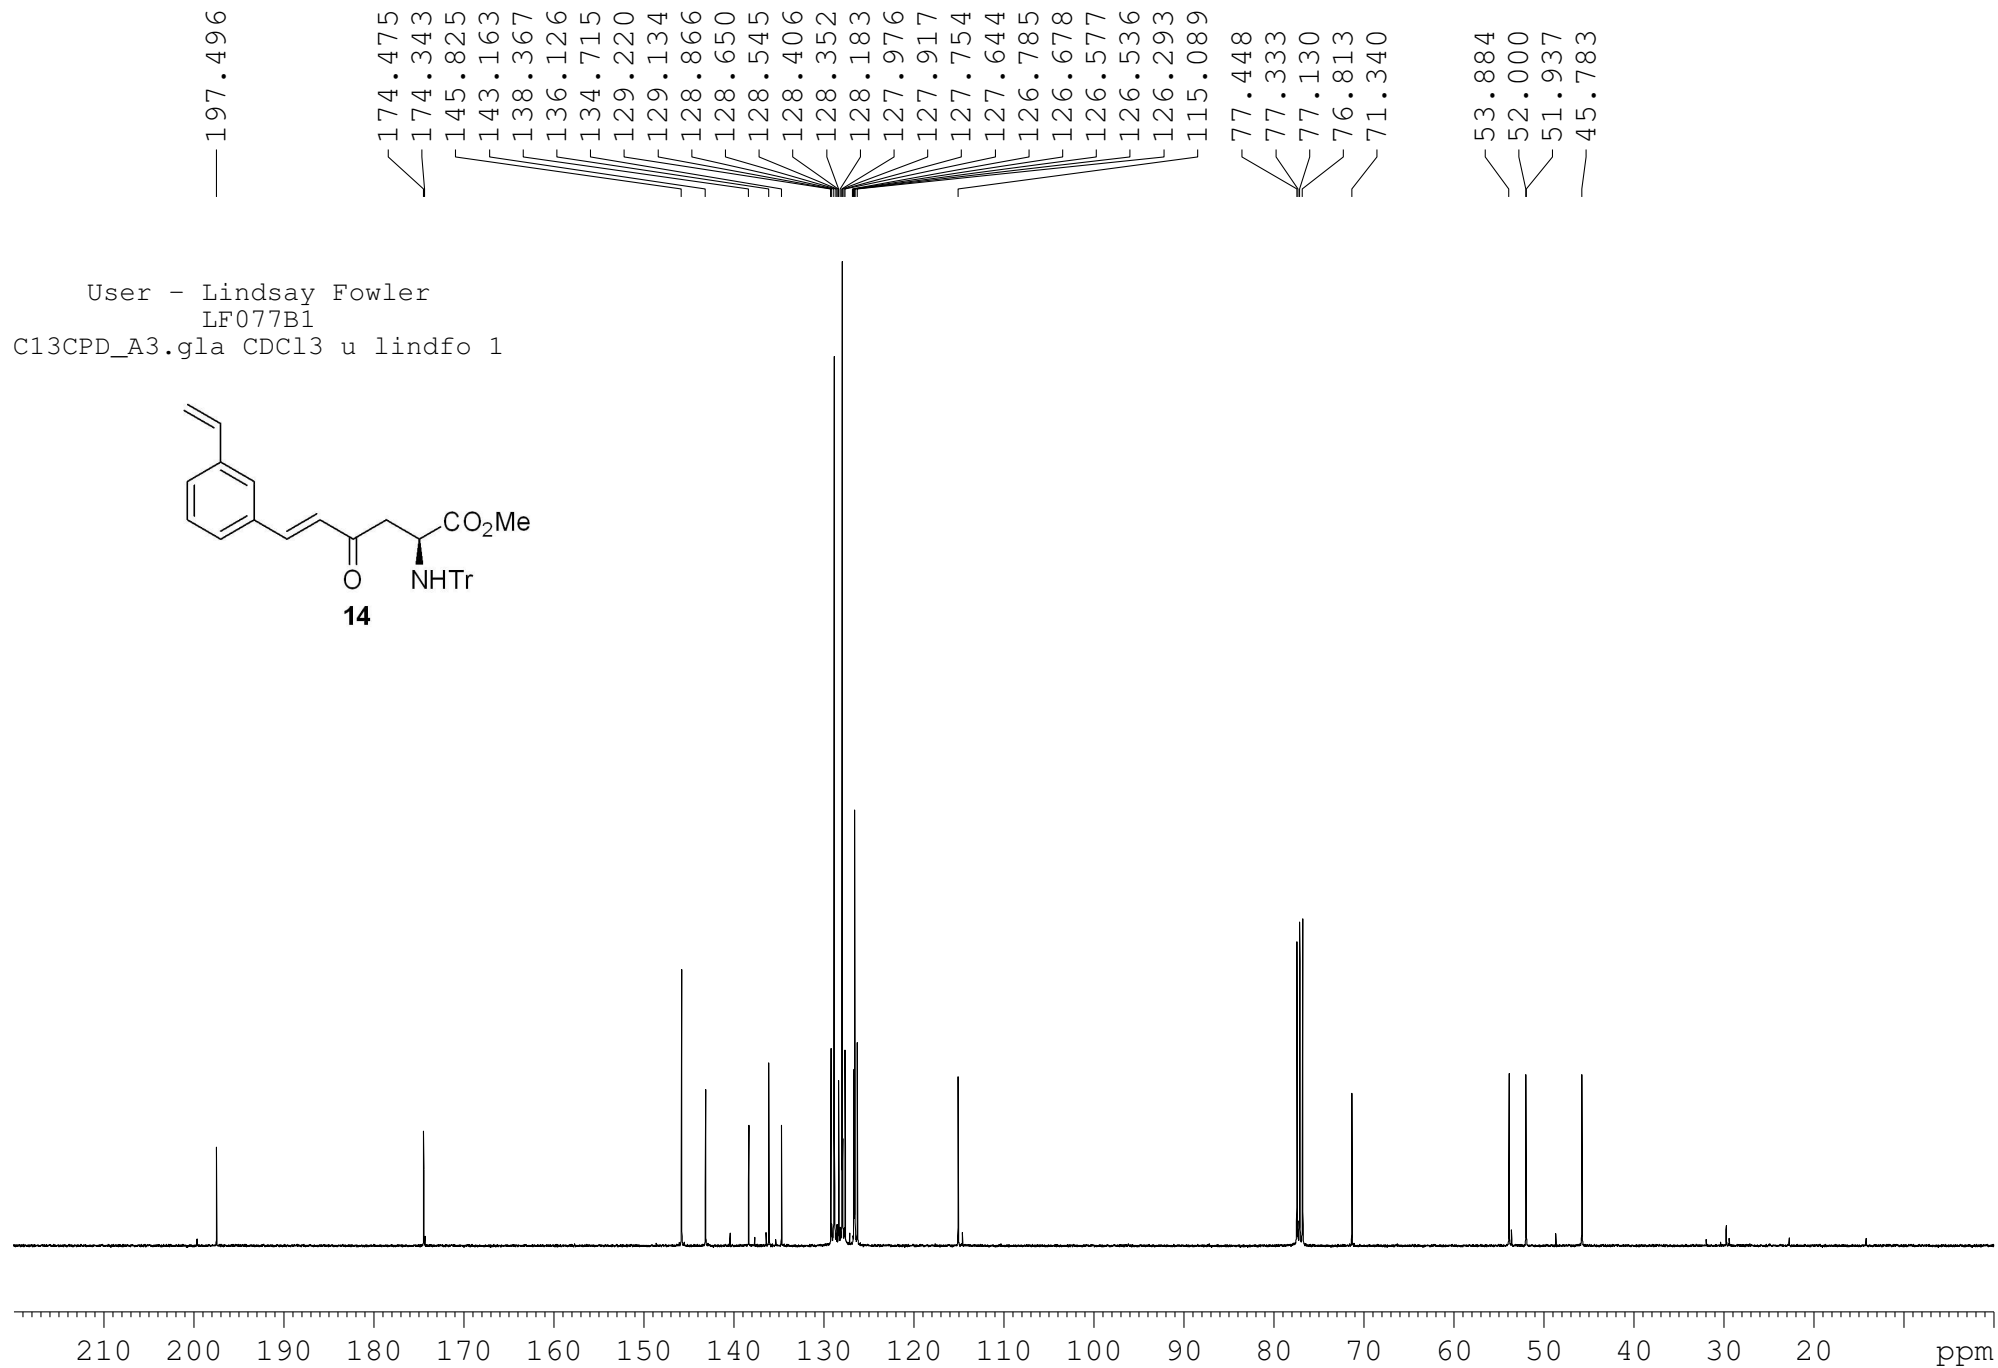

7.939  
7.886  
7.873  
7.863  
7.842  
7.679  
7.675  
7.666  
7.658  
7.654  
7.626  
7.548  
7.545  
7.534  
7.527  
7.524  
7.506  
7.273  
7.268  
7.259  
7.255  
7.235  
7.195  
7.182  
7.177  
7.172  
7.159  
6.823  
6.783  
3.853  
3.835  
3.828  
3.822  
3.815  
3.797  
3.287  
3.241  
2.992  
2.979  
2.954  
2.941  
2.926  
2.867  
2.849  
2.829  
2.812

— 0.000

User - Lindsay Fowler  
LF123B1  
PROTON\_C\_A3.gla CDCl3 u lindfo 50

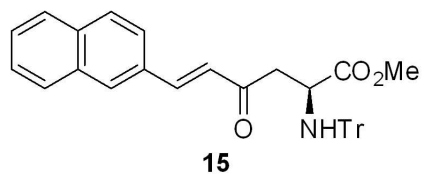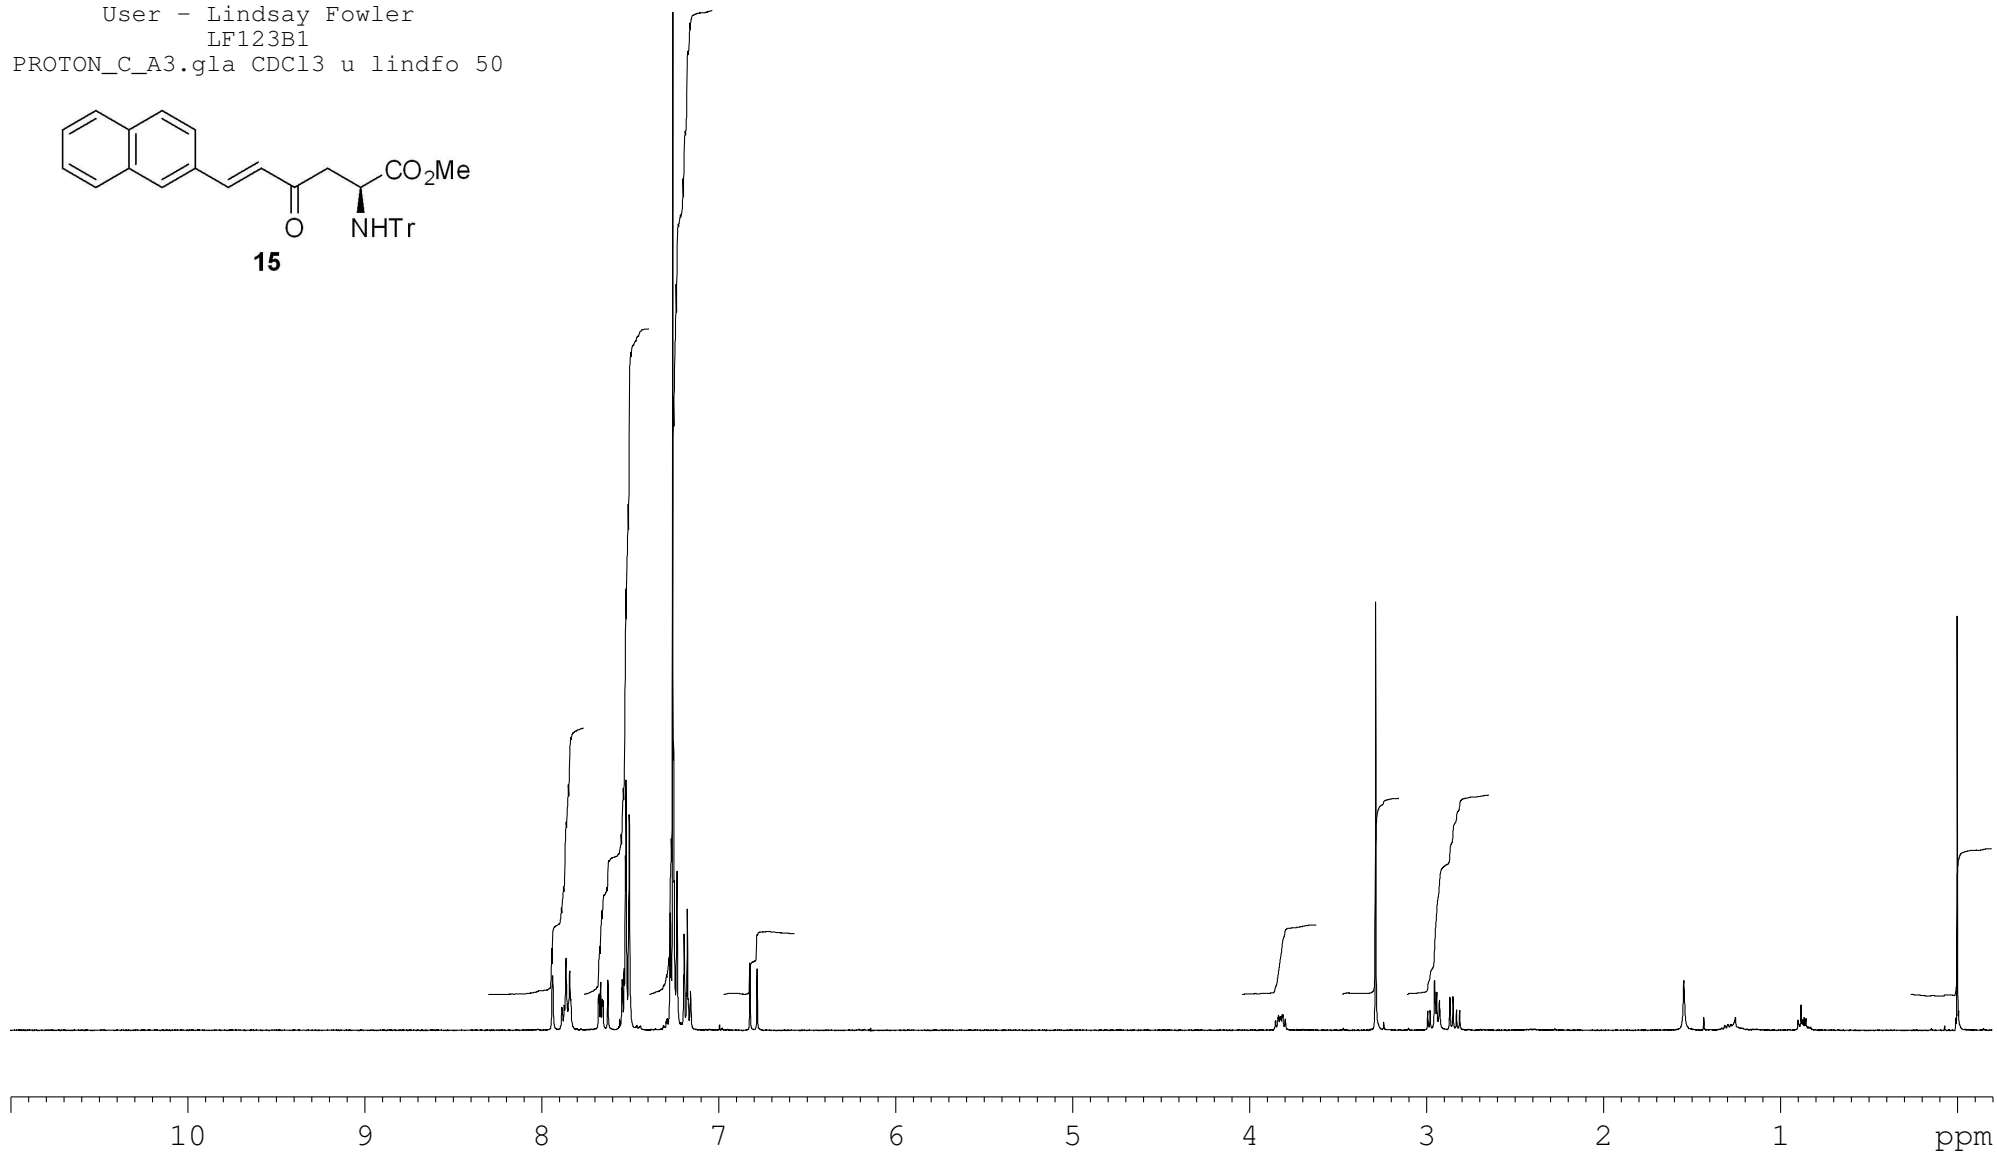

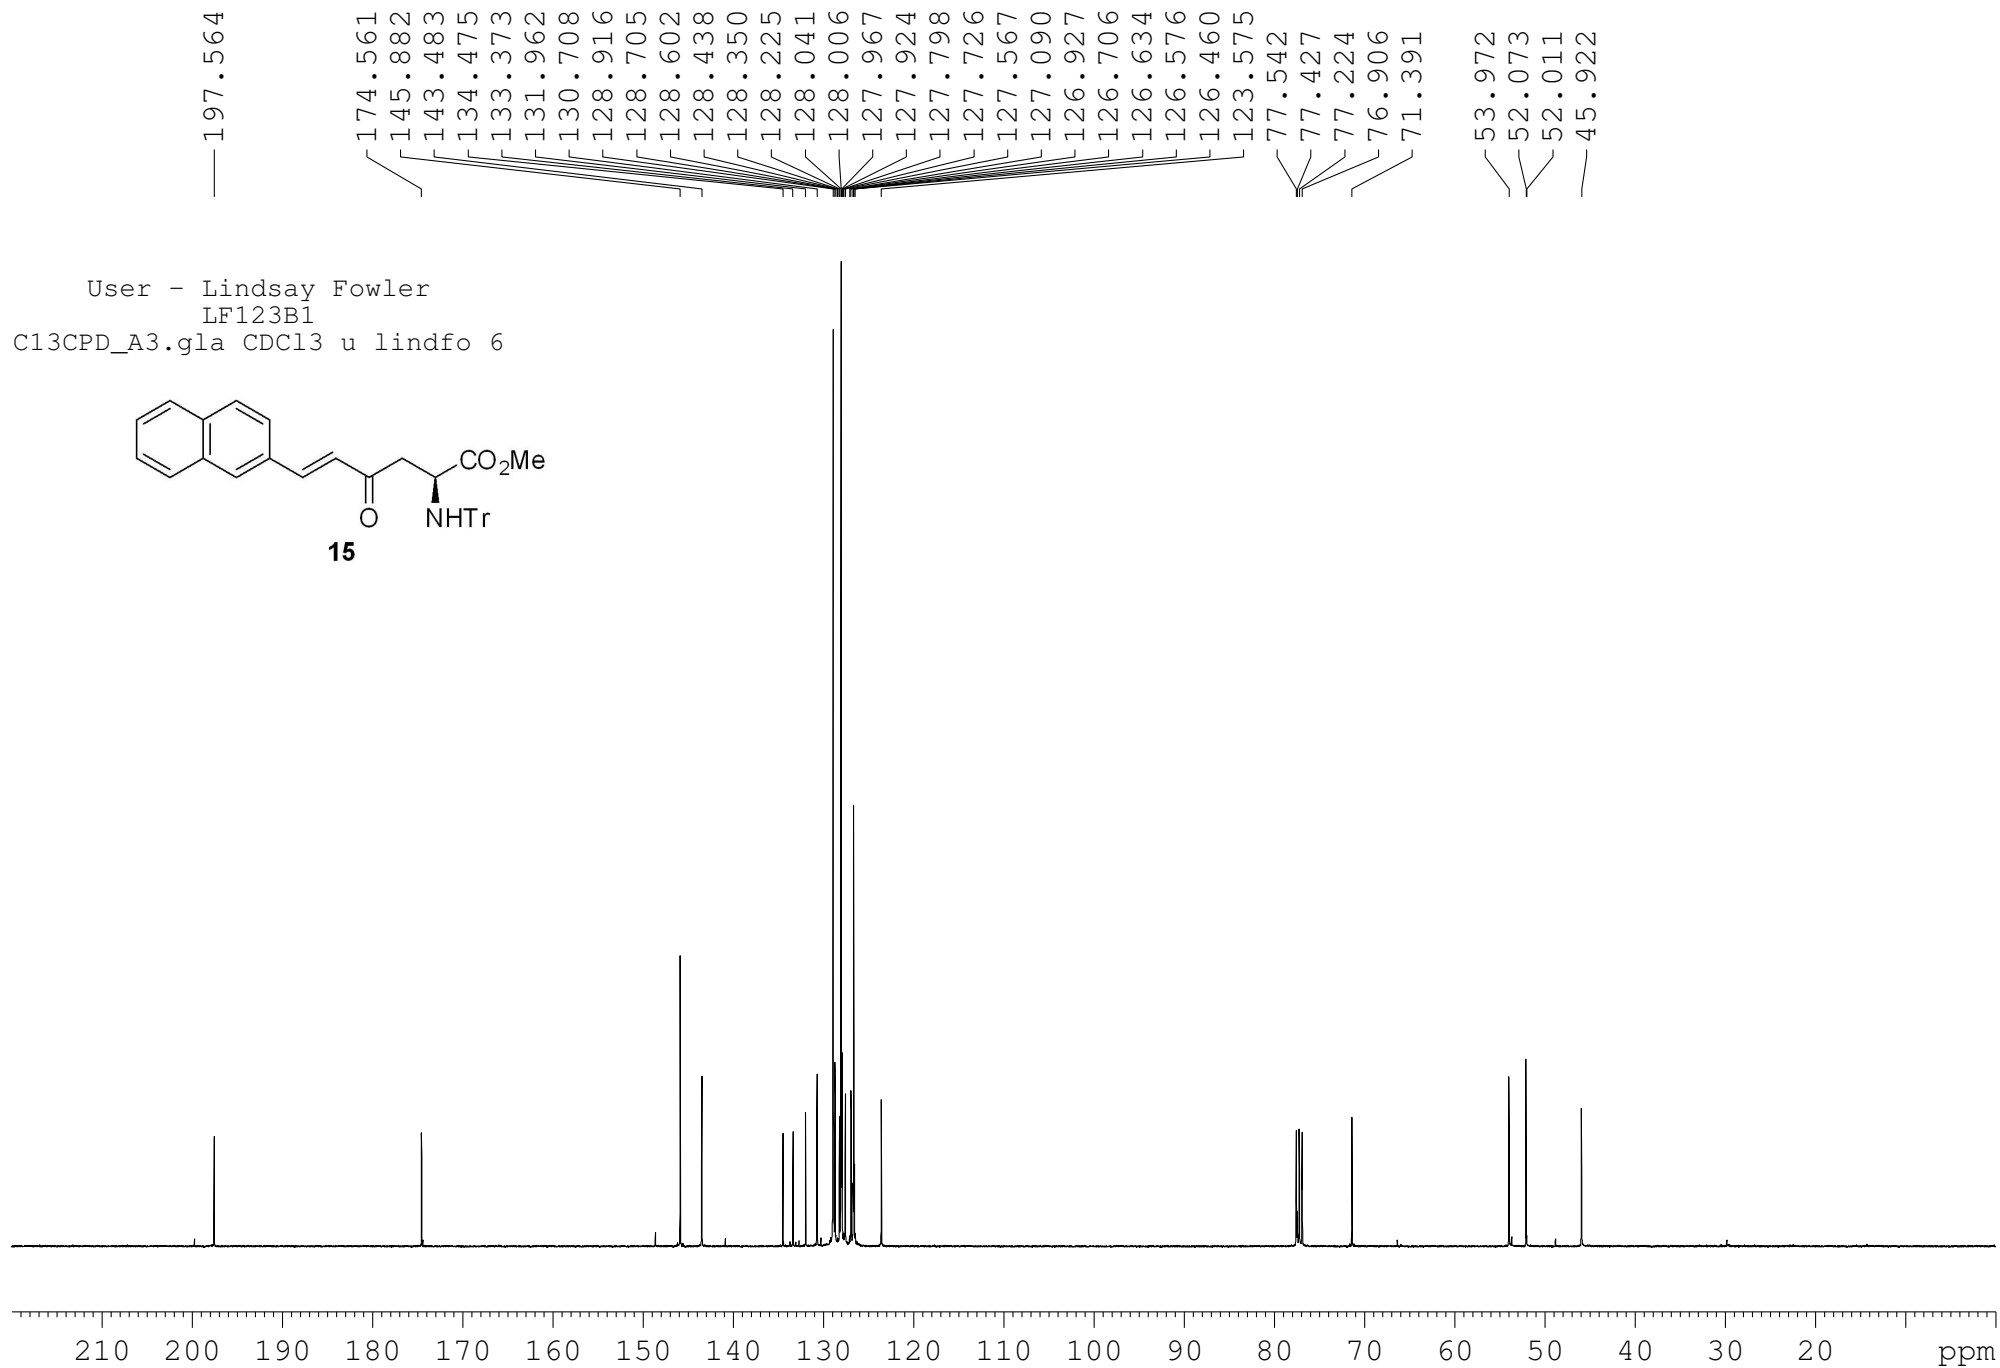

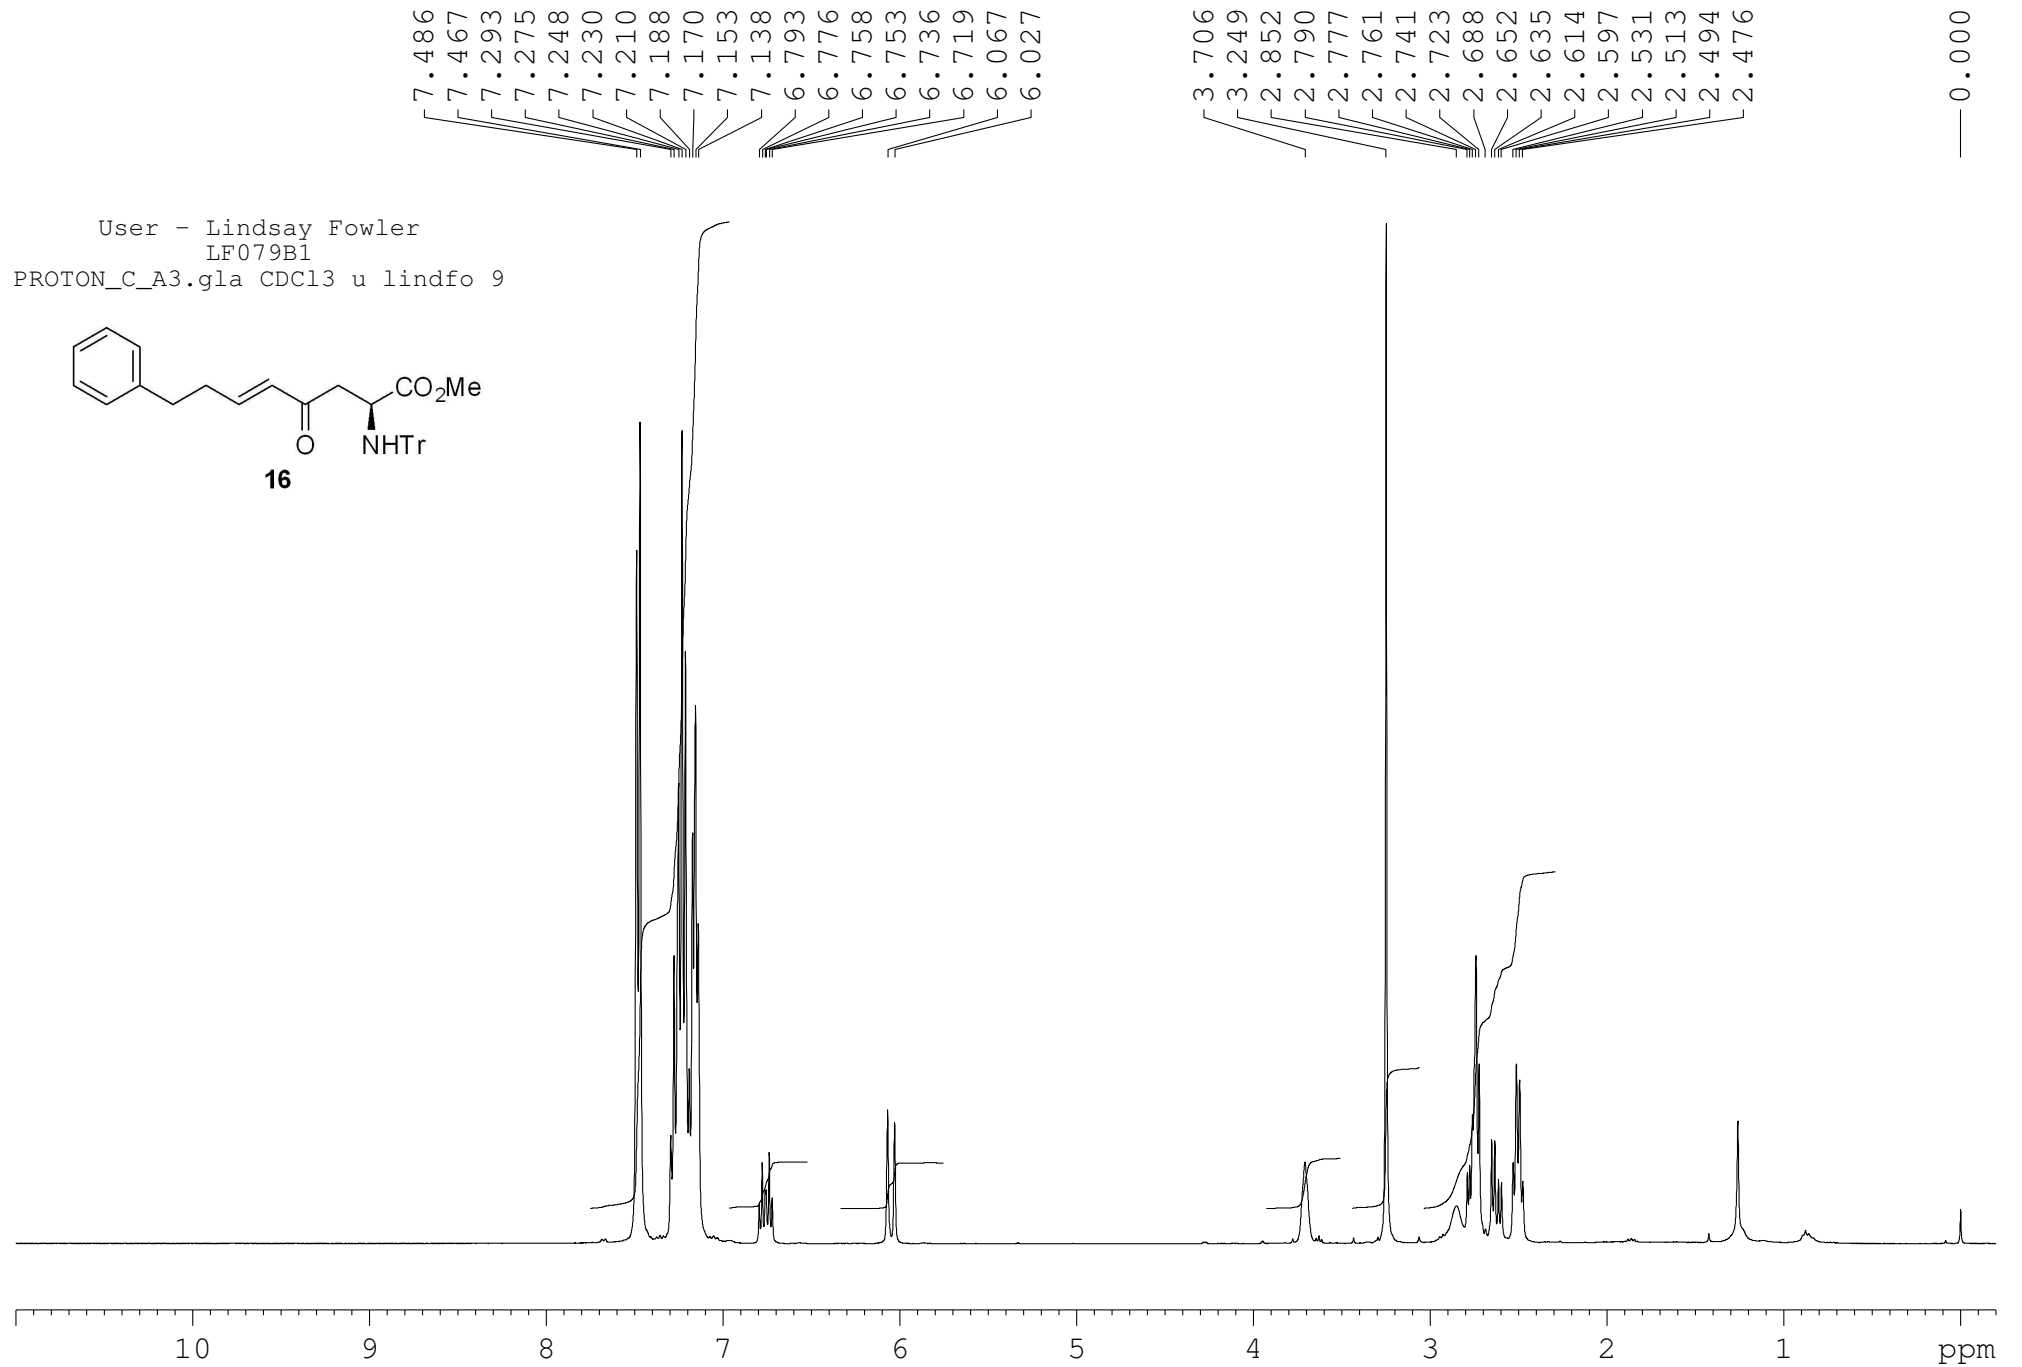

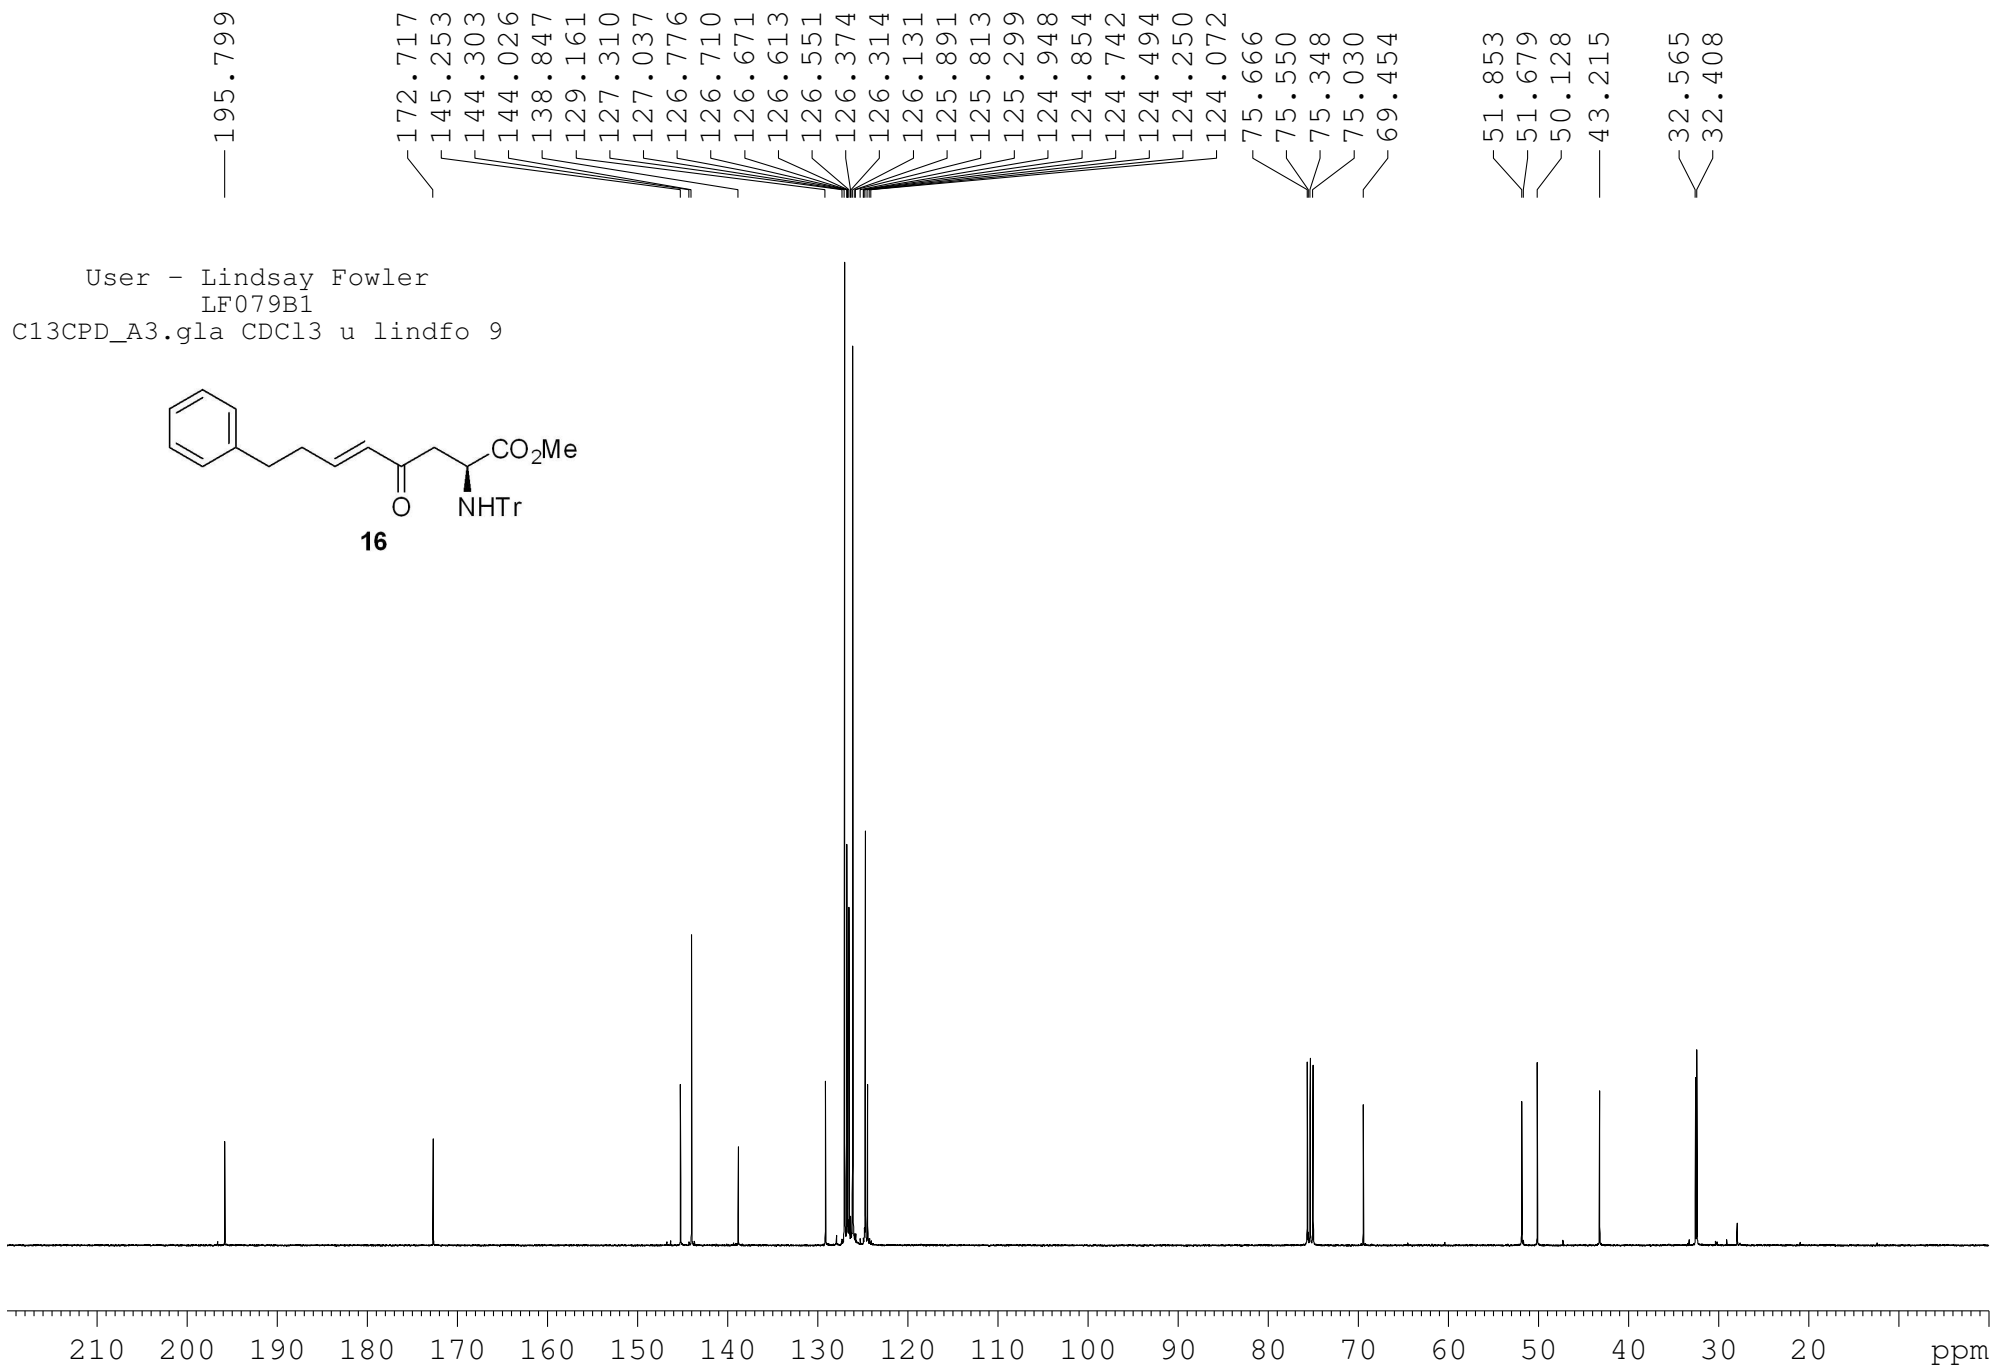

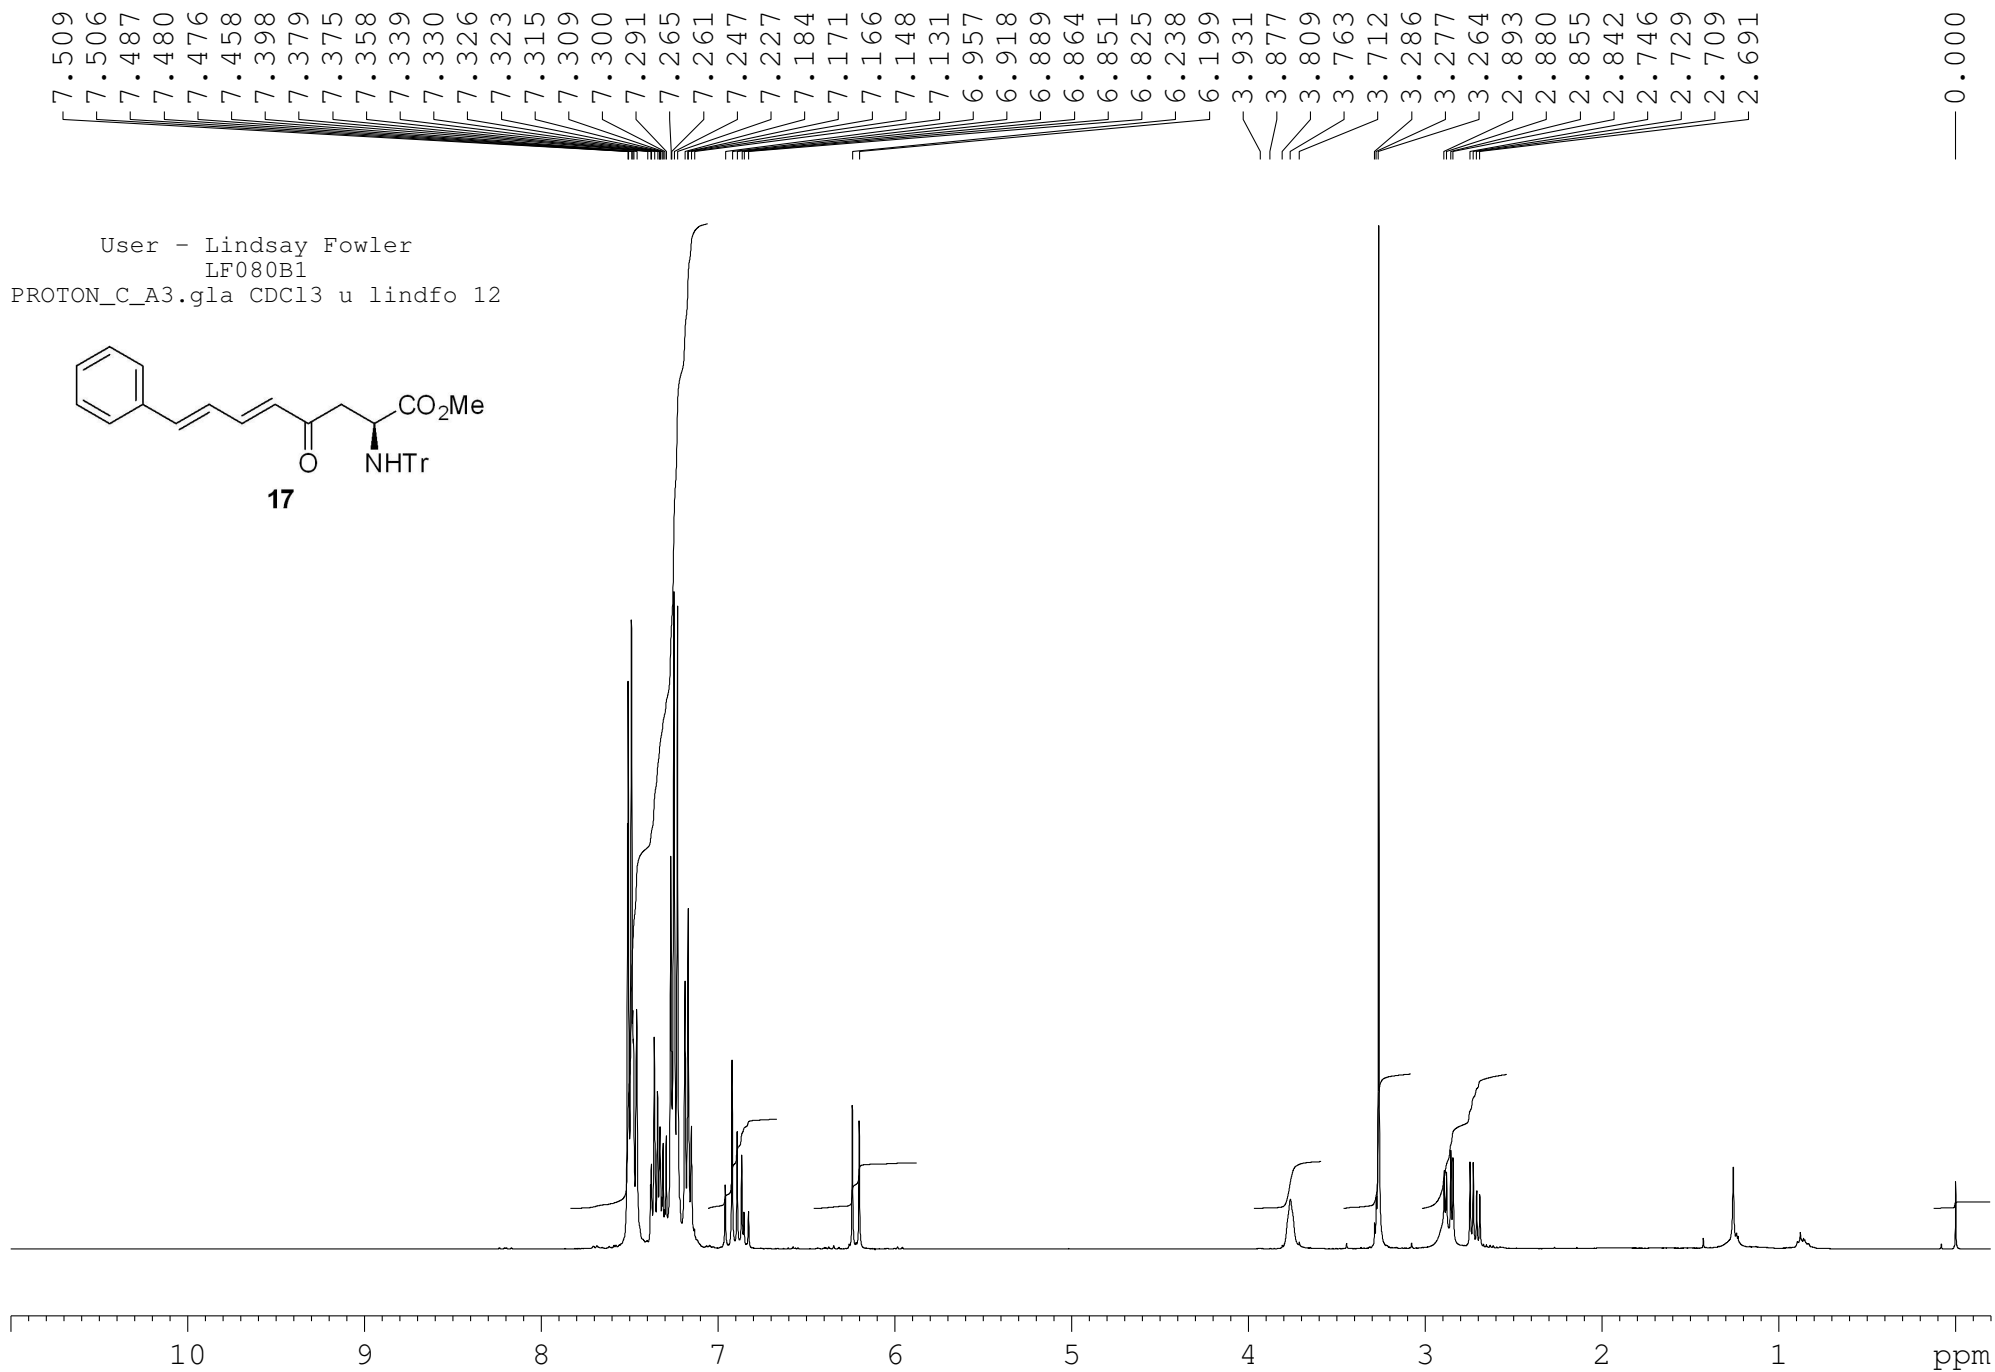

— 197.595

— 174.535

145.792  
143.501  
141.810  
135.943  
129.762  
129.357  
129.288  
128.919  
128.834  
128.659  
128.147  
127.942  
127.328  
126.633  
126.531

77.374  
77.262  
77.056  
76.739  
71.261

53.843  
51.983  
45.604

User - Lindsay Fowler  
LF080B2  
C13CPD\_A3.gla CDC13 u lindfo 1

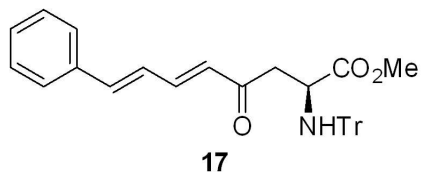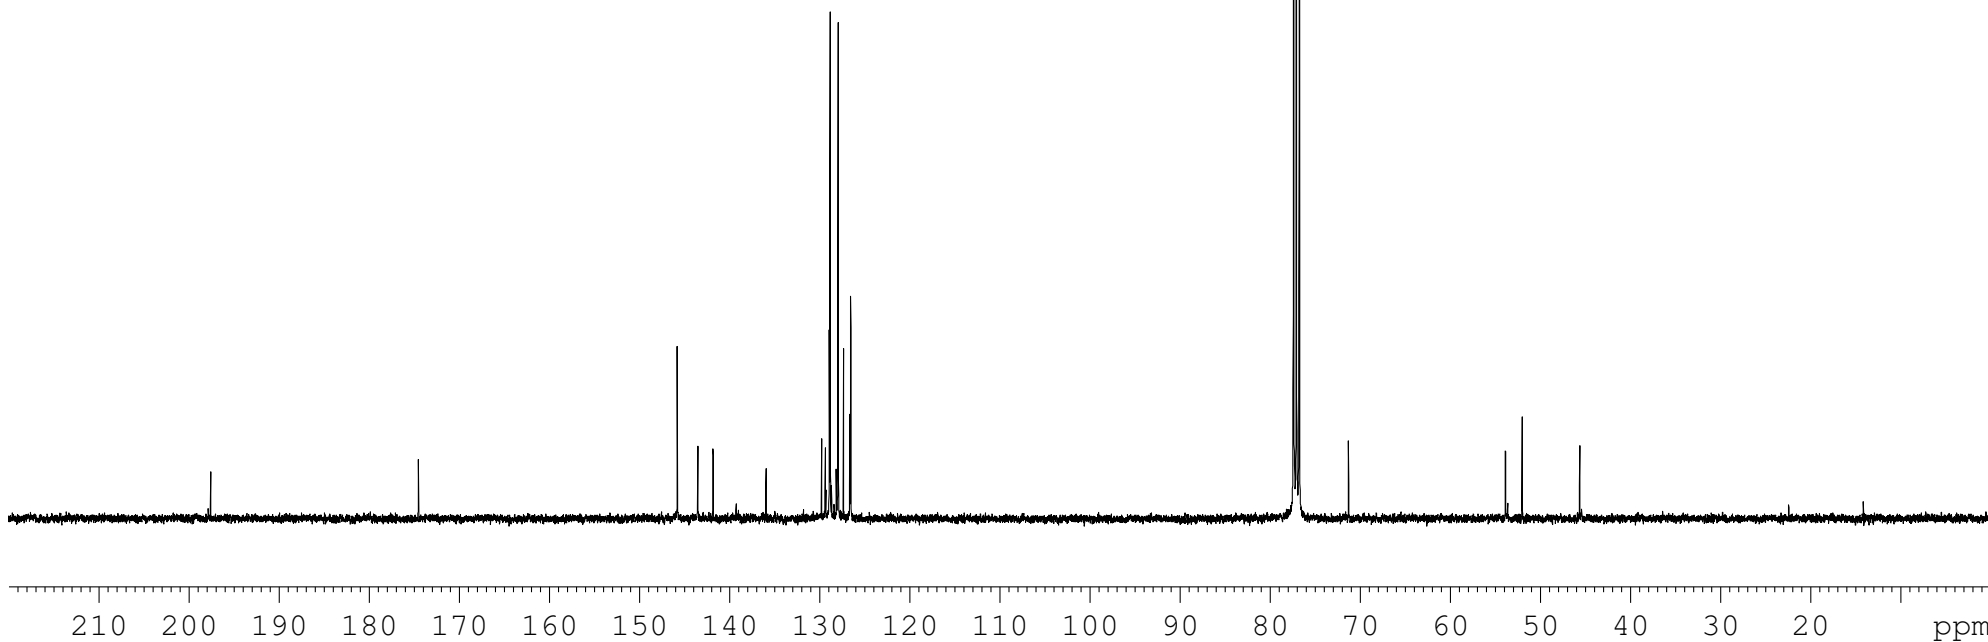



7.502  
7.483  
7.283  
7.269  
7.260  
7.242  
7.223  
7.184  
7.165  
7.148  
6.665  
6.657  
6.615  
6.576  
6.490  
6.486  
6.483

3.771  
3.271  
3.244  
2.878  
2.865  
2.840  
2.827  
2.801  
2.787  
2.752  
2.735  
2.714  
2.697

— 0.000

User - Lindsay Fowler  
LF081B1  
PROTON\_C\_A3.gla CDCl3 u lindfo 25

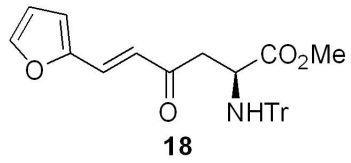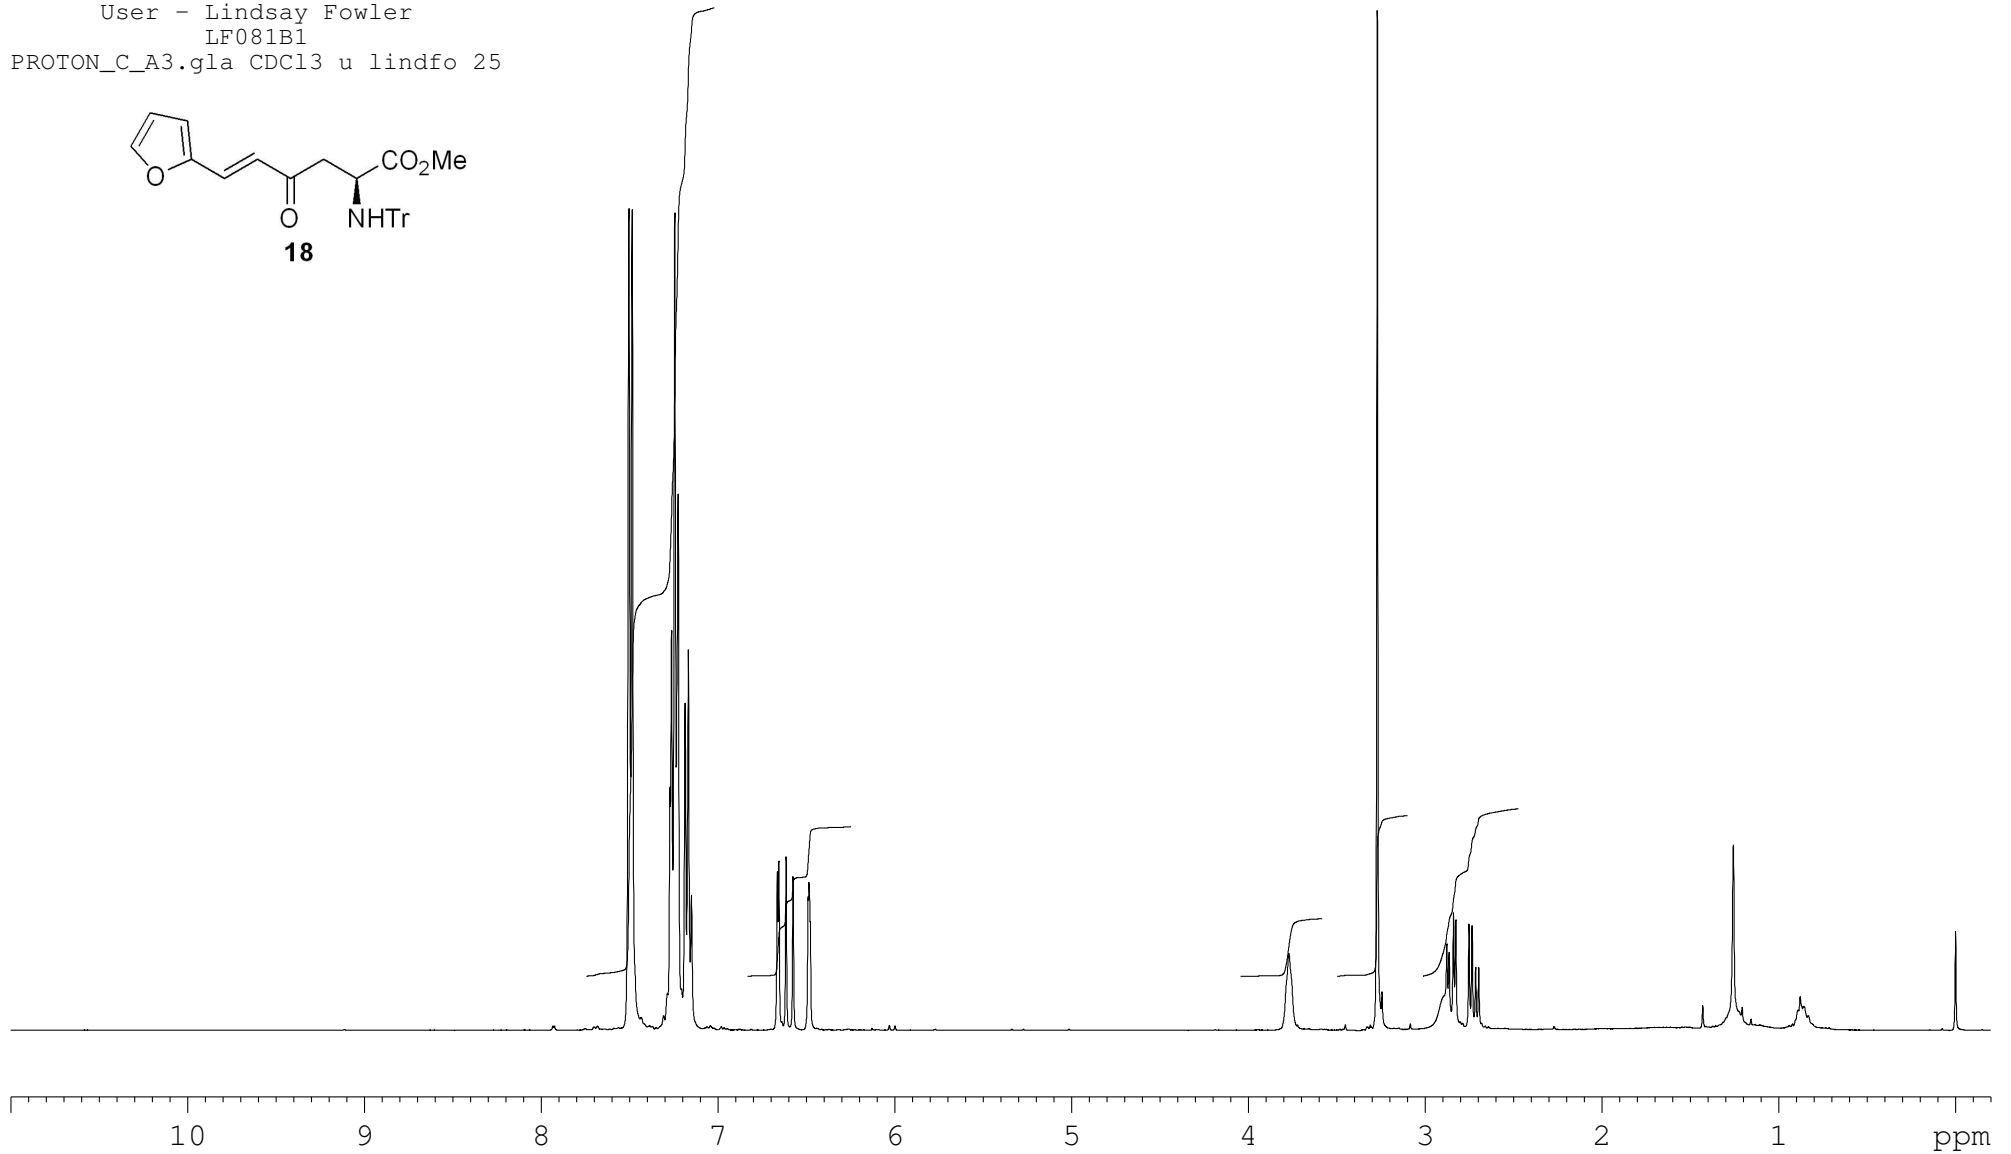

197.096  
174.488  
151.007  
145.812  
145.503  
145.194  
144.931  
130.113  
129.820  
129.751  
129.310  
129.124  
128.852  
128.631  
128.583  
128.476  
128.351  
128.267  
127.947  
127.270  
126.947  
126.757  
126.551  
123.611  
116.178  
113.023  
112.812  
112.694  
77.450  
77.334  
77.132  
76.814  
71.311  
53.863  
52.371  
51.984  
46.189

User - Lindsay Fowler  
LF081B1  
C13CPD\_A3.gla CDCl3 u lindfo 6

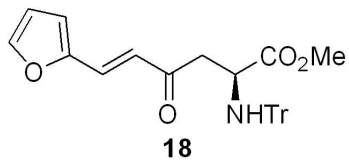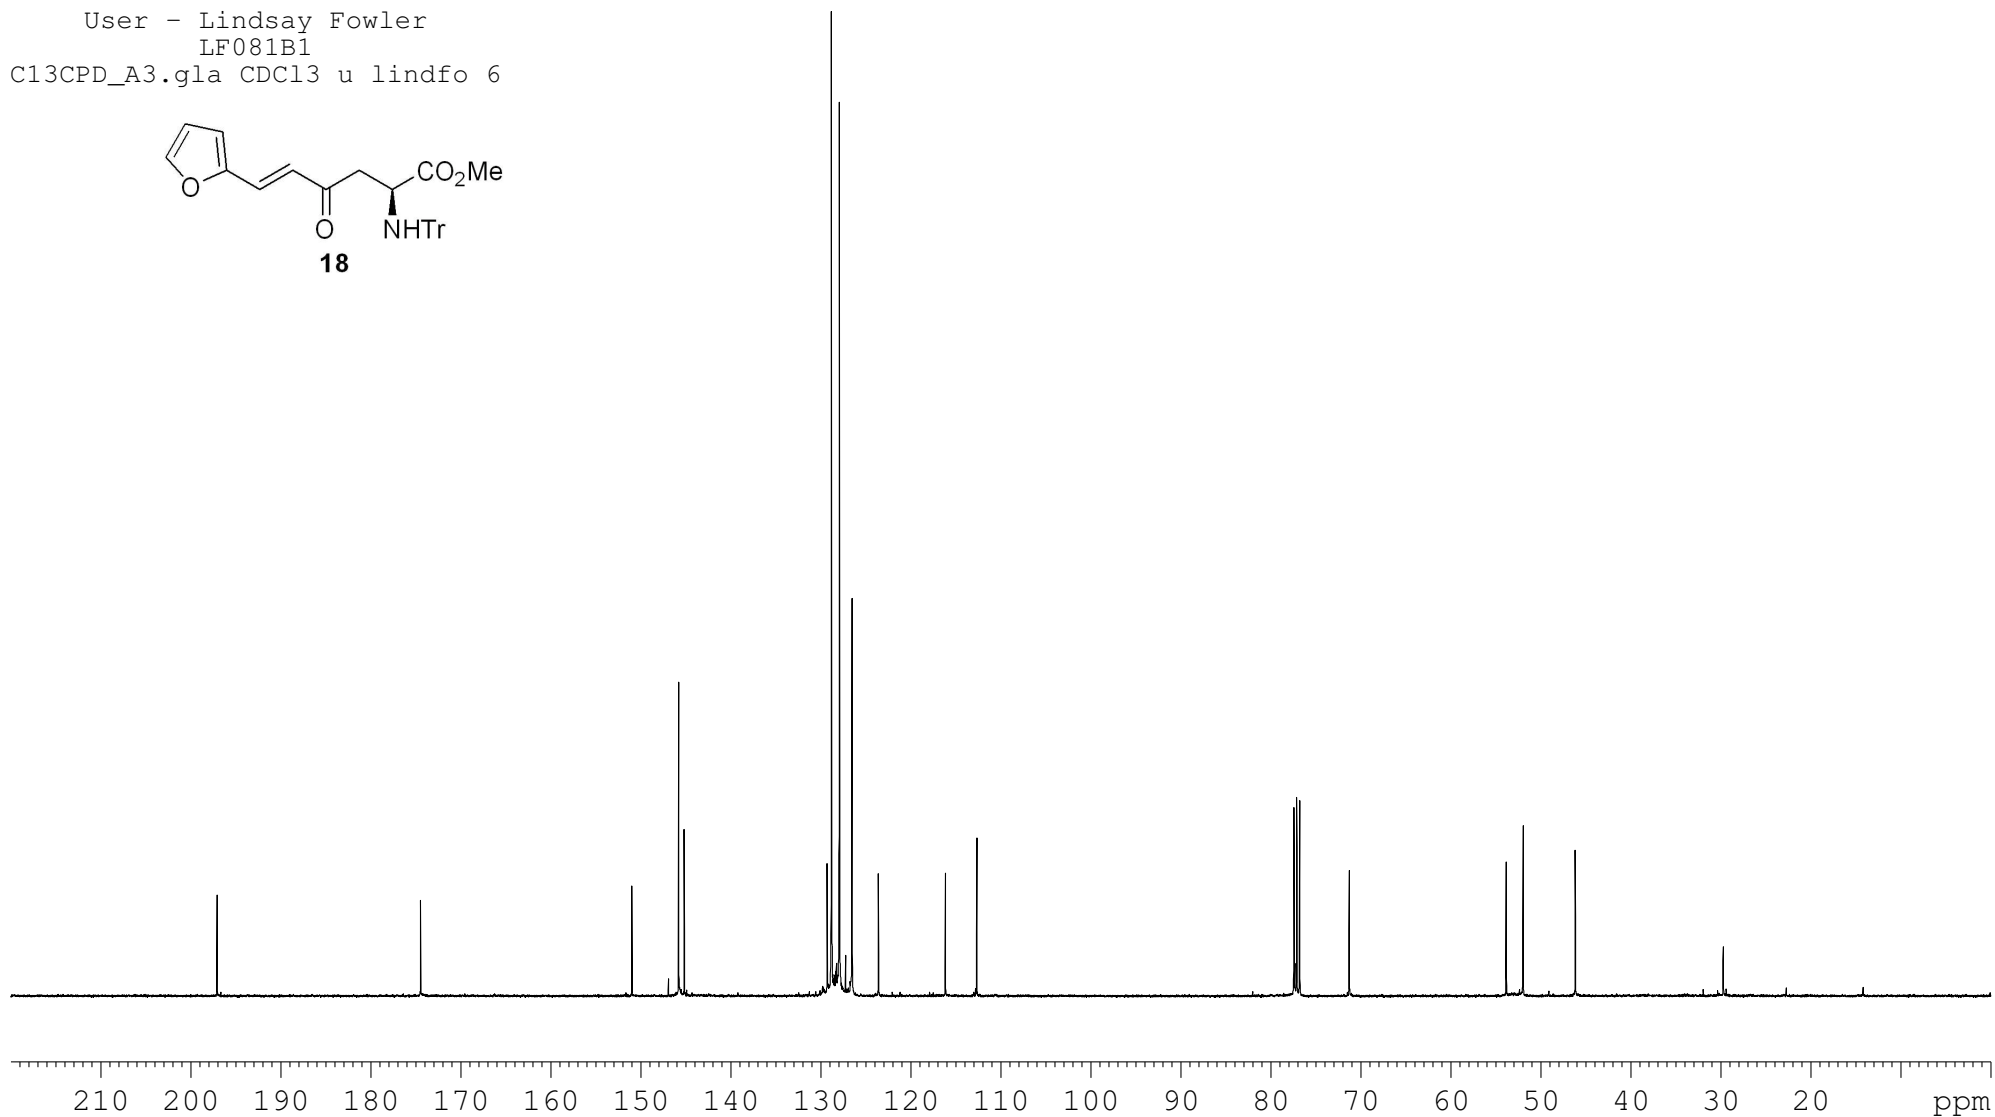

7.534  
7.494  
7.424  
7.421  
7.416  
7.403  
7.386  
7.301  
7.288  
7.210  
7.188  
7.186  
7.176  
7.174  
7.156  
7.141  
7.136  
7.125  
7.117  
7.105  
7.098  
7.095  
7.092  
7.082  
7.077  
7.072  
7.062  
7.059  
7.056  
6.970  
6.961  
6.957  
6.948  
6.434  
6.394  
3.723  
3.692  
3.188  
2.816  
2.801  
2.787  
2.763  
2.750  
2.687  
2.673  
2.656  
2.636  
2.618  
0.000

User - Lindsay Fowler  
LF084B1  
PROTON\_C\_A3.gla CDCl3 u lindfo 52

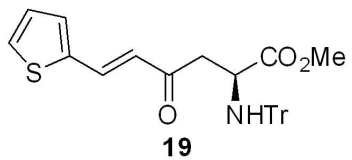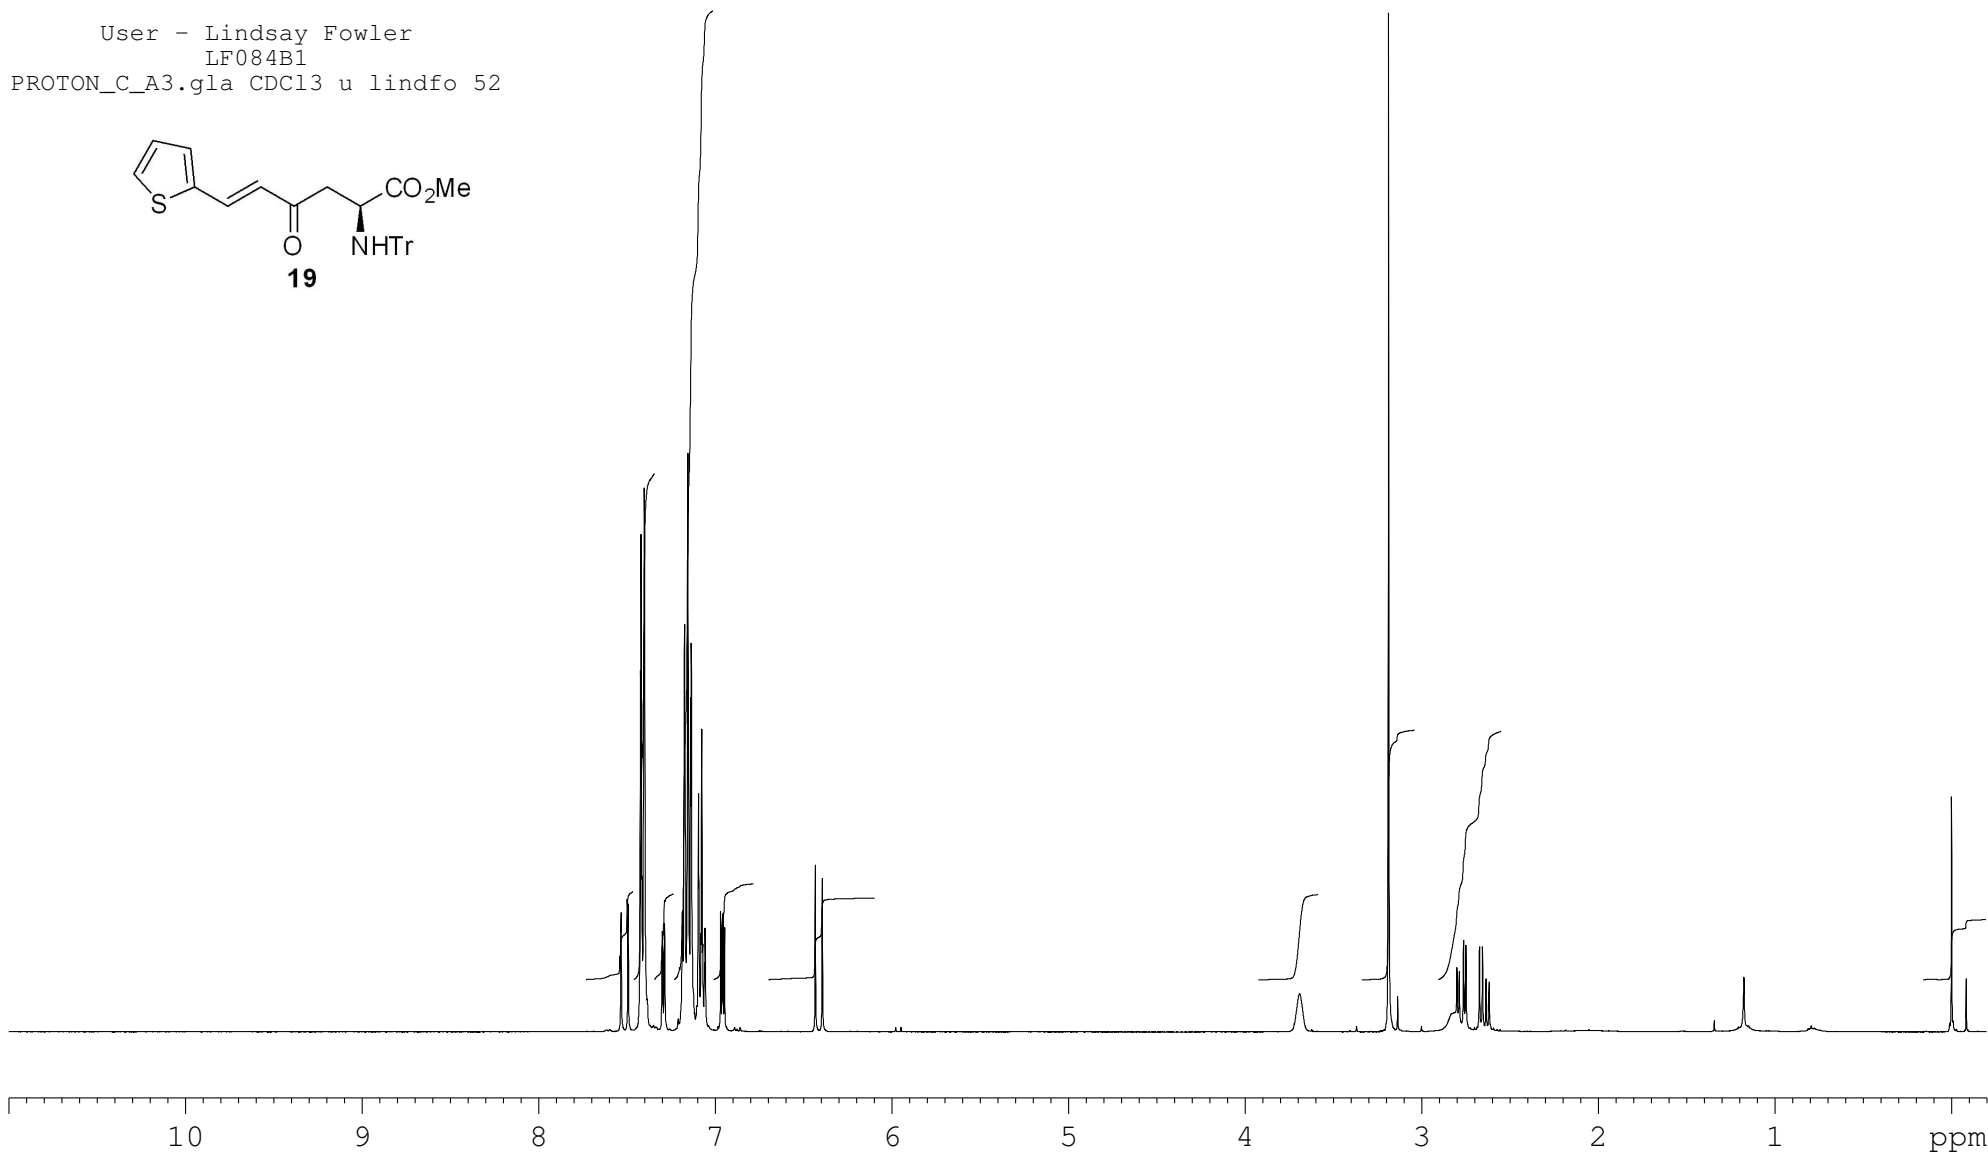

— 195.742

— 173.228

144.567  
138.586  
134.454  
130.699  
127.912  
127.618  
127.401  
127.154  
126.941  
126.736  
126.493  
125.695  
125.539  
125.413  
125.334  
123.925

76.194  
76.079  
75.876  
75.559  
70.079

52.769  
52.652  
50.778  
50.701  
44.716

User - Lindsay Fowler  
LF084B1  
C13CPD\_A3.gla CDCl3 u lindfo 8

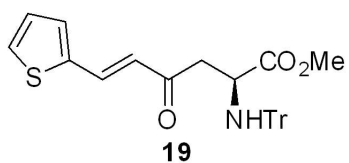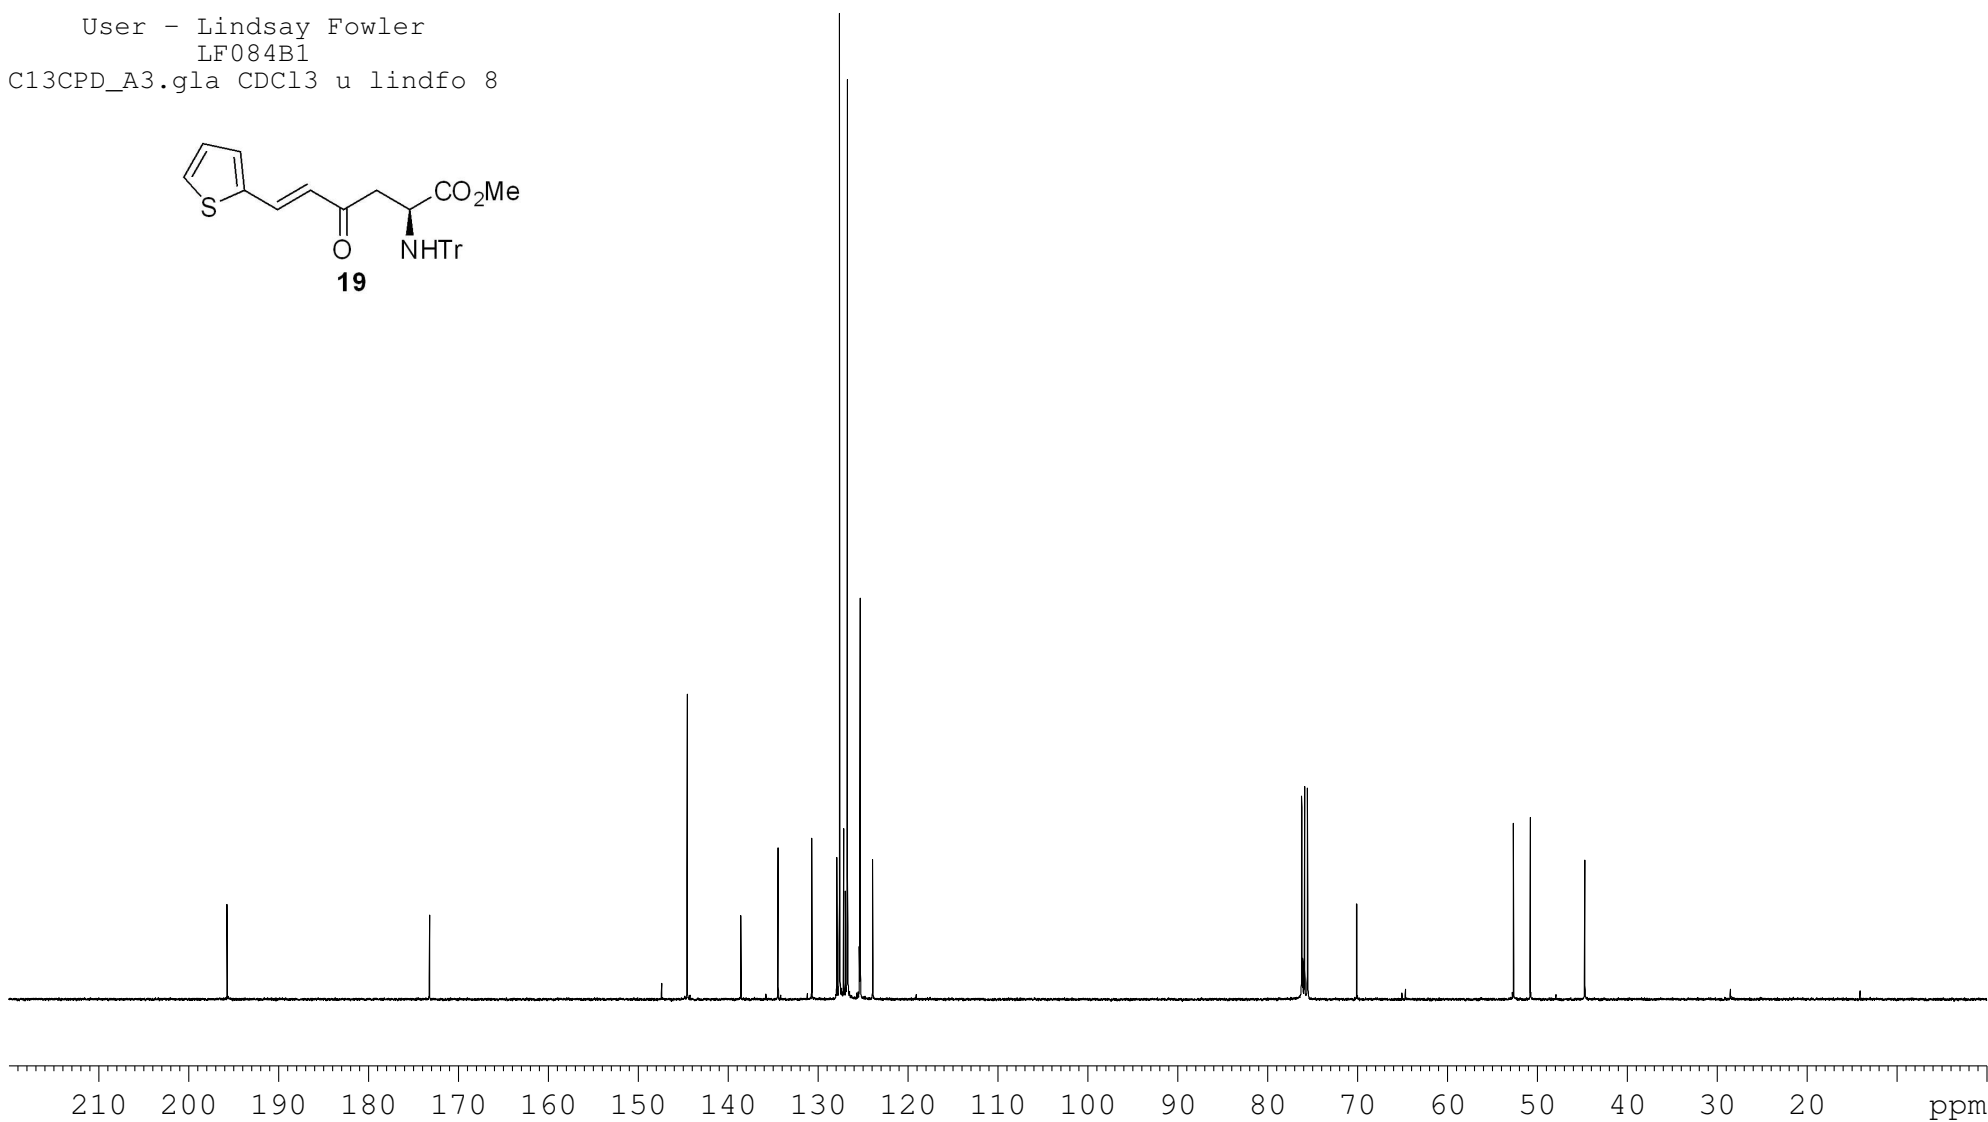

8.476  
8.232  
8.212  
7.943  
7.924  
7.664  
7.660  
7.646  
7.626  
7.606  
7.540  
7.522  
7.502  
7.466  
7.273  
7.255  
7.248  
7.236  
7.196  
7.178  
7.160  
6.773  
6.732

3.817  
3.300  
2.969  
2.956  
2.931  
2.919  
2.846  
2.828  
2.808  
2.790

0.000

User - Lindsay Fowler  
LF214B1  
PROTON\_C\_A3.gla CDCl3 u lindfo 20

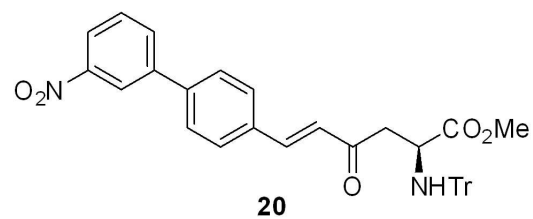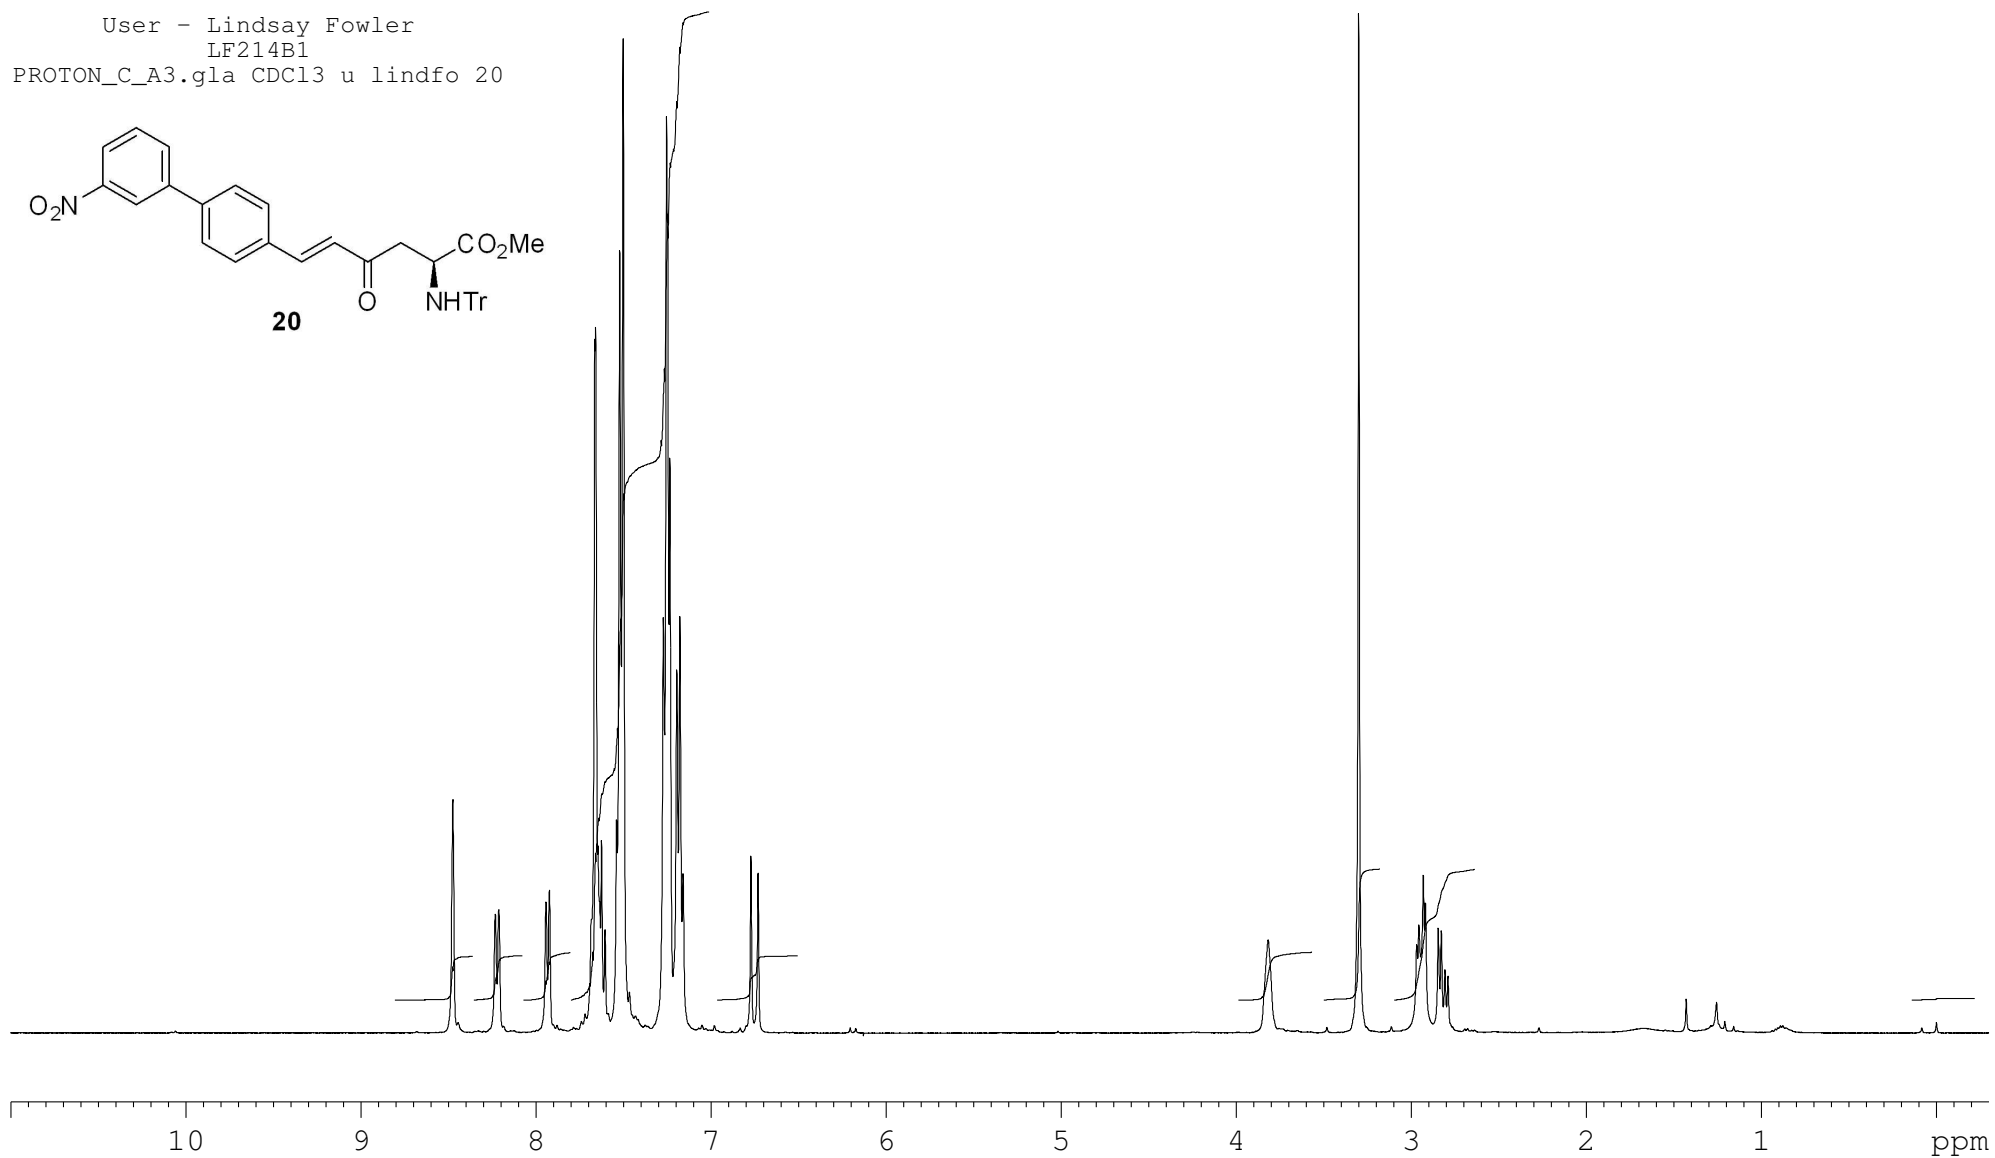

— 197.418

— 174.469

148.823  
145.810  
142.183  
141.737  
140.581  
134.668  
132.939  
130.007  
129.183  
128.854  
128.330  
128.168  
127.990  
127.736  
126.986  
126.804  
126.598  
122.641  
122.401  
121.885

77.464  
77.347  
77.146  
76.828  
71.328

53.823  
52.061  
— 45.876

User - Lindsay Fowler  
LF214B1  
C13CPD\_A3.gla CDCl3 u lindfo 2

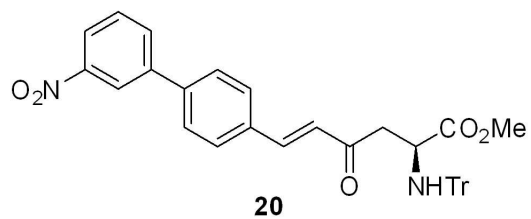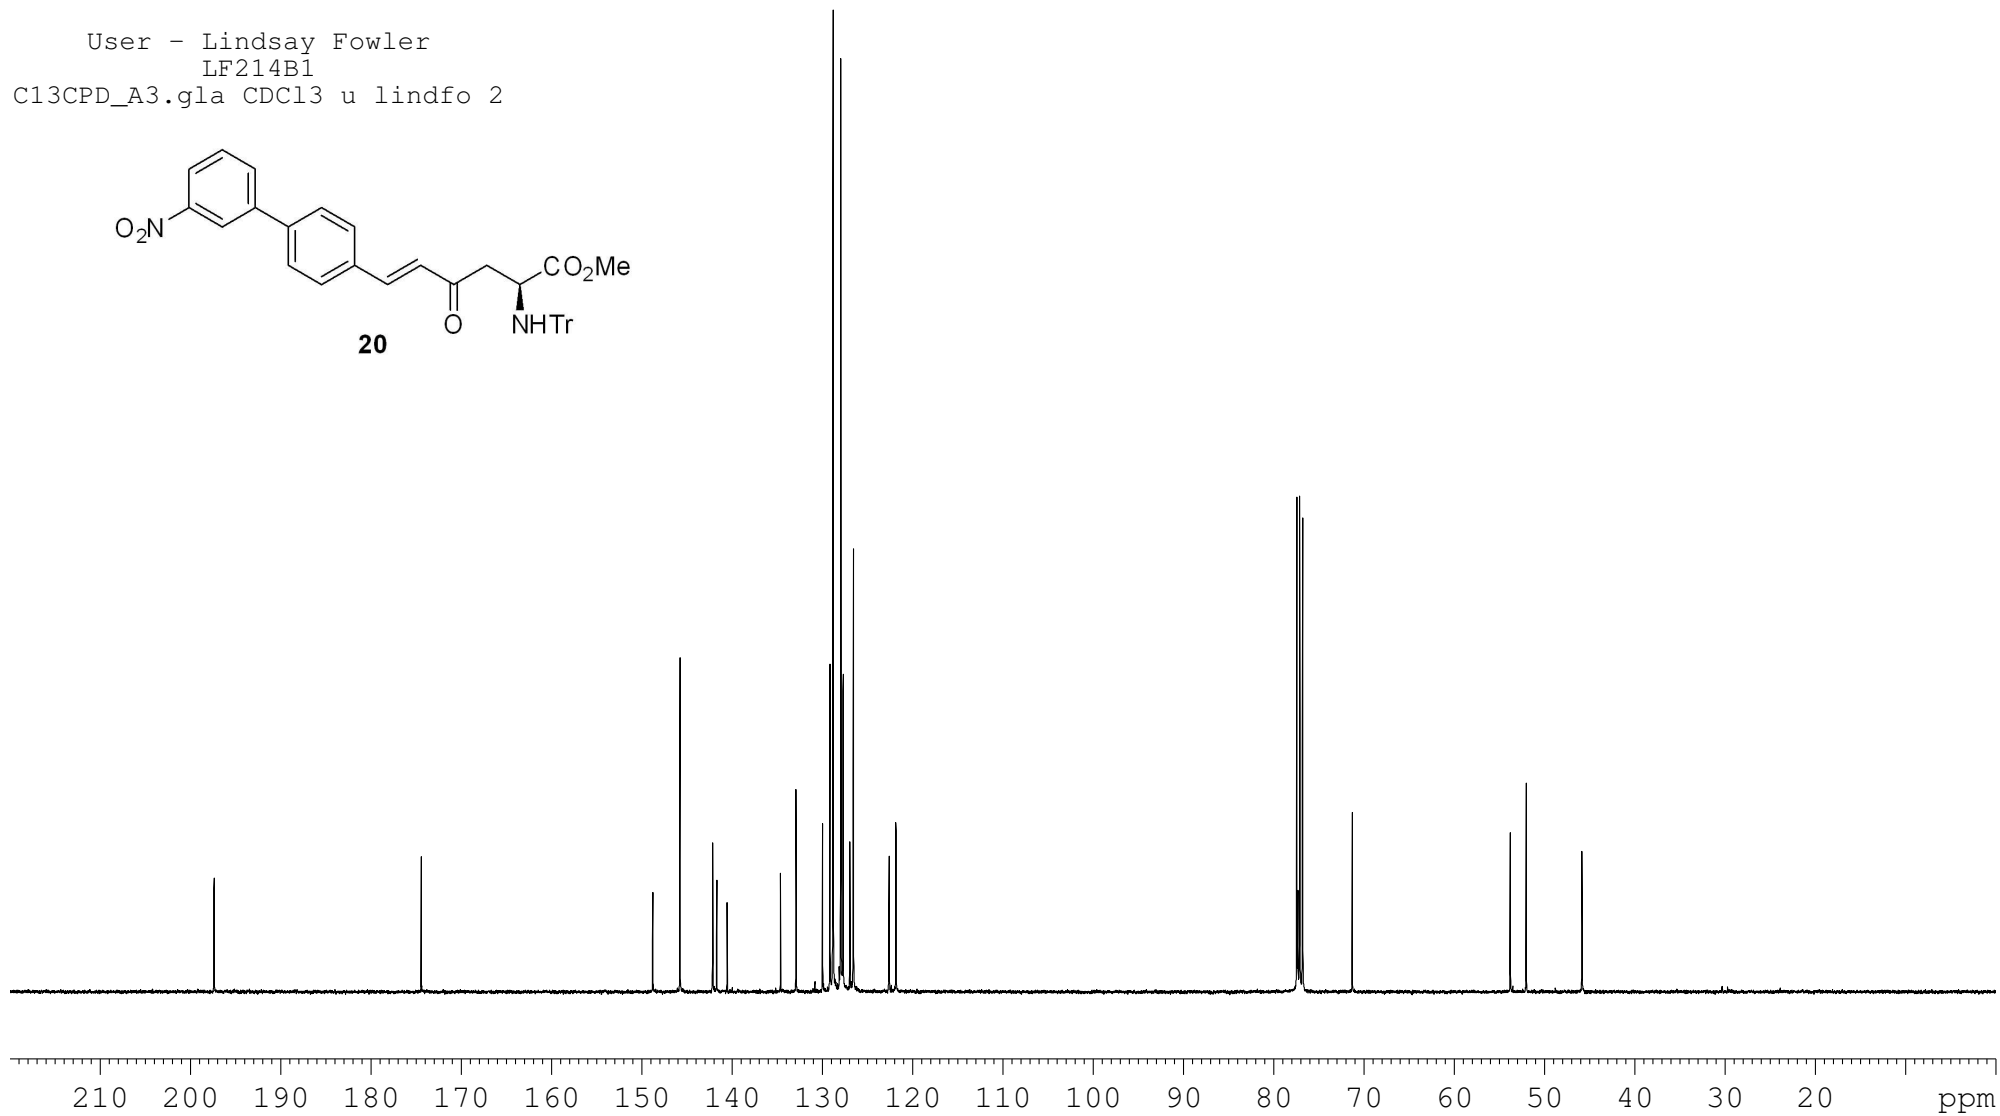

7.600  
7.591  
7.571  
7.515  
7.496  
7.479  
7.417  
7.397  
7.378  
7.259  
7.234  
7.195  
7.177  
7.159  
6.741  
6.728  
6.688

— 5.230

— 3.796

3.289

2.939

2.915

2.826

2.808

2.788

2.770

— 0.000

User - Lindsay Fowler  
LF218B1  
PROTON\_C\_A3.gla CDCl3 u lindfo 21

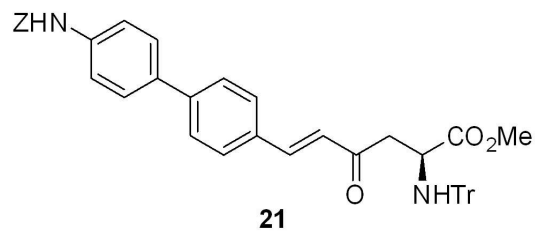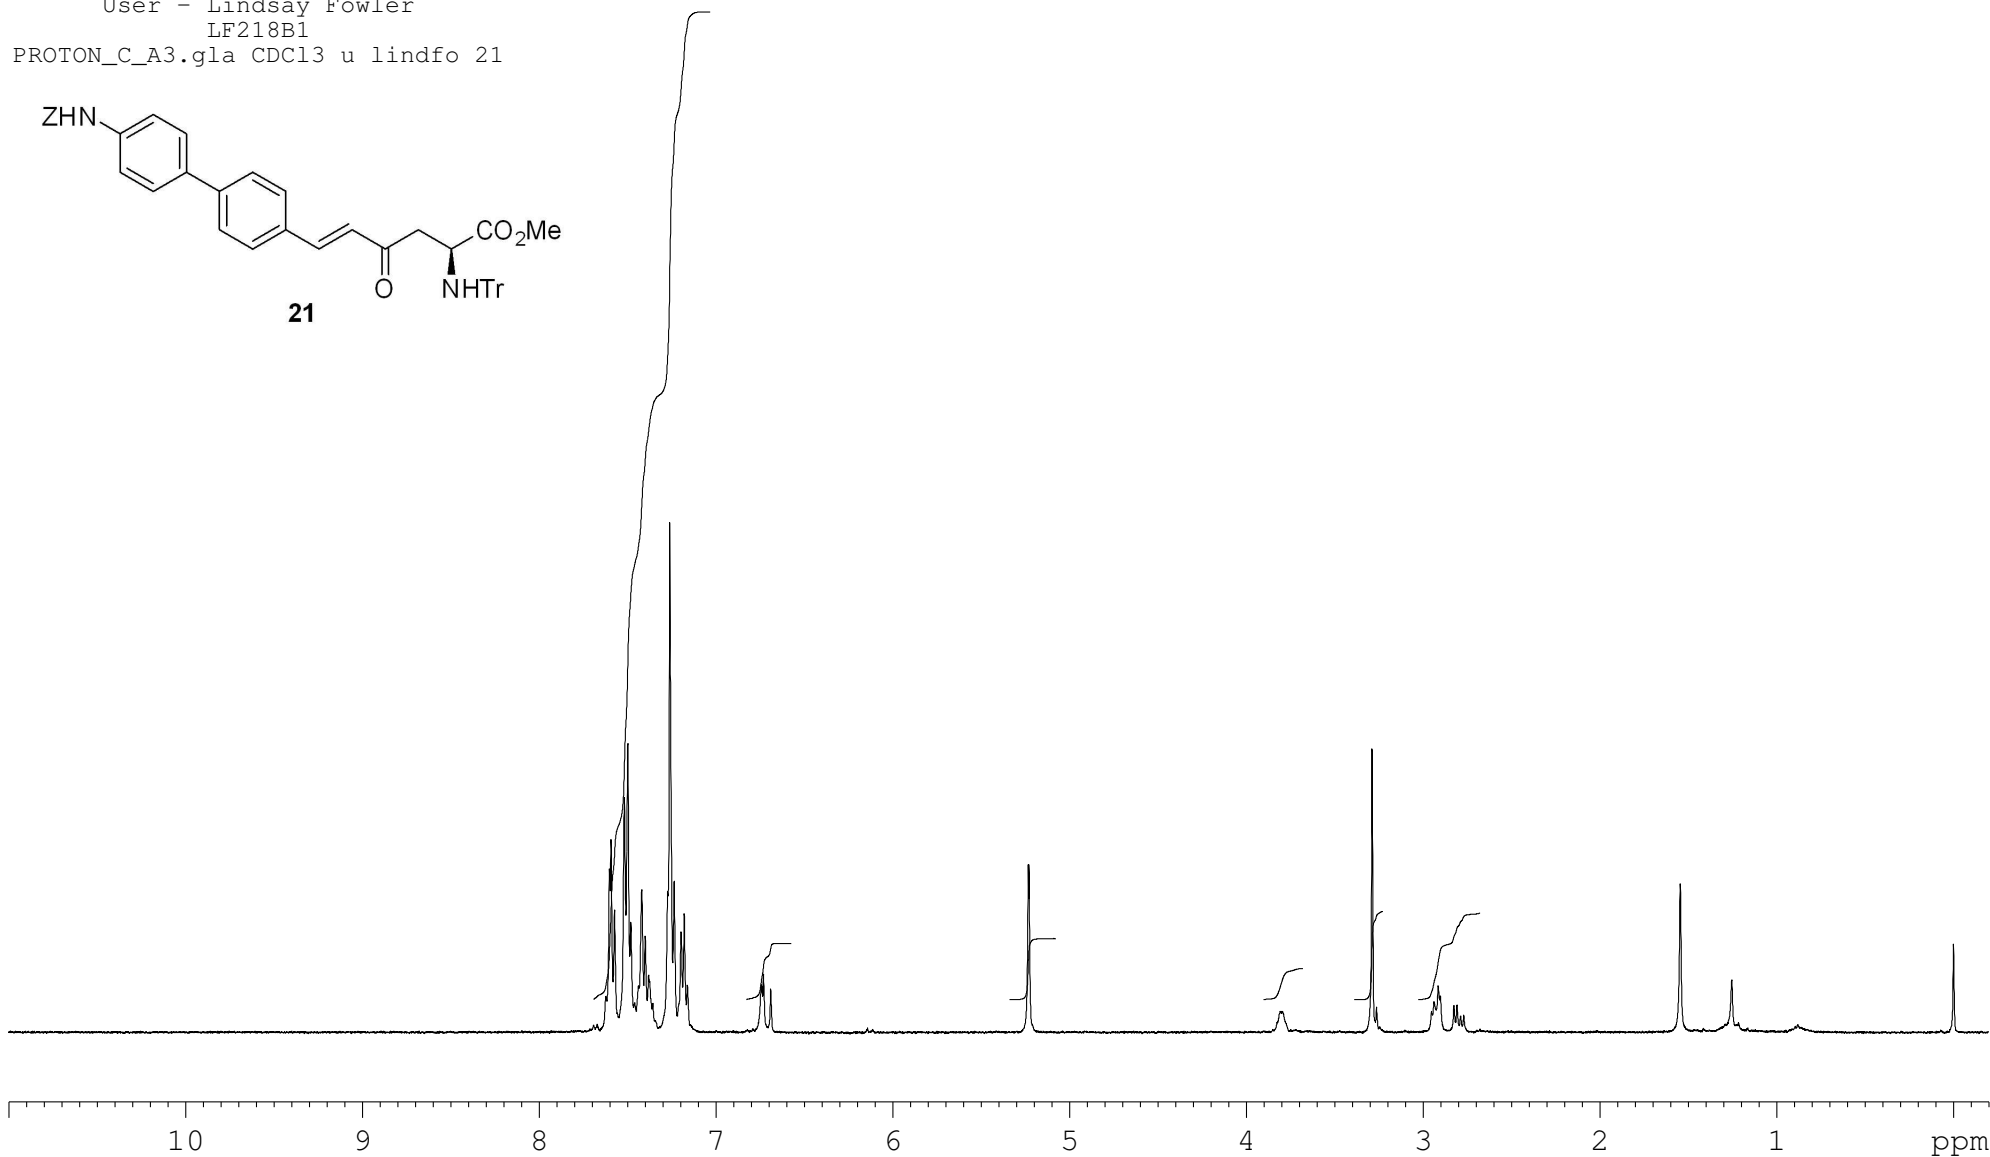

— 197.570

— 174.564

153.294  
145.810  
142.953  
142.703  
137.854  
135.980  
135.060  
133.053  
128.969  
128.849  
128.696  
128.475  
128.398  
127.966  
127.681  
127.191  
126.562  
126.079  
119.019

77.404  
77.289  
77.086  
76.769  
71.310  
67.187

53.867  
52.026  
— 45.740

User - Lindsay Fowler  
LF218B1  
C13CPD\_A3.gla CDCl3 u lindfo 7

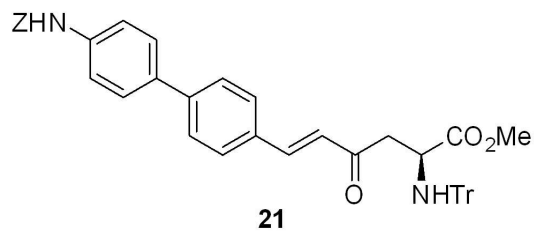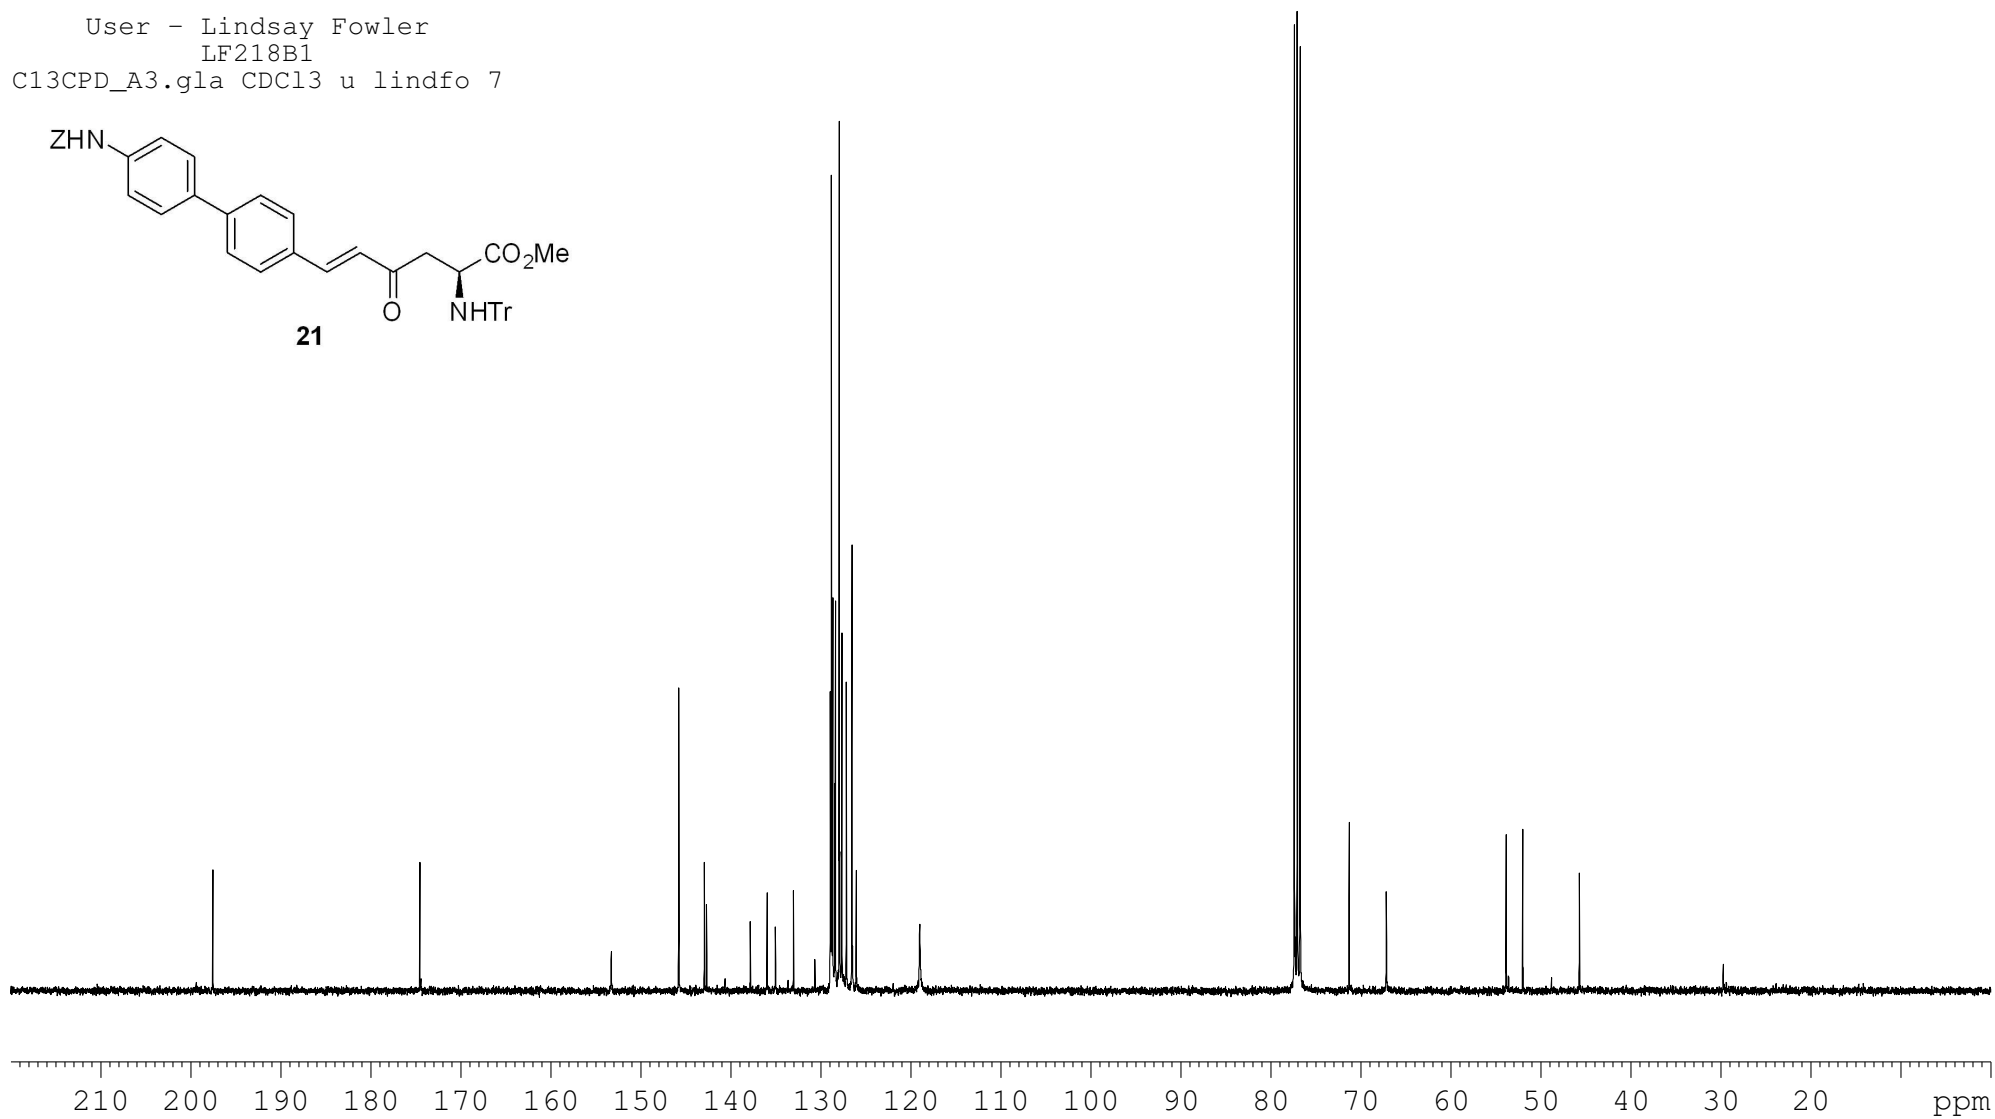



7.731  
7.710  
7.697  
7.513  
7.494  
7.282  
7.269  
7.252  
7.232  
7.189  
7.172  
7.148  
7.126  
7.104  
6.752  
6.744  
6.705  
6.696  
6.690  
6.650

3.796  
3.272  
2.930  
2.917  
2.893  
2.880  
2.795  
2.777  
2.757  
2.740

0.000

User - Lindsay Fowler  
LF216B1  
PROTON\_C\_A3.gla CDCl3 u lindfo 22

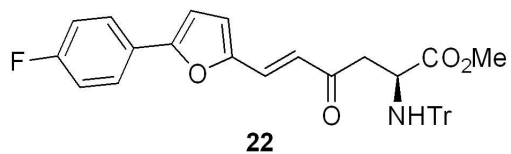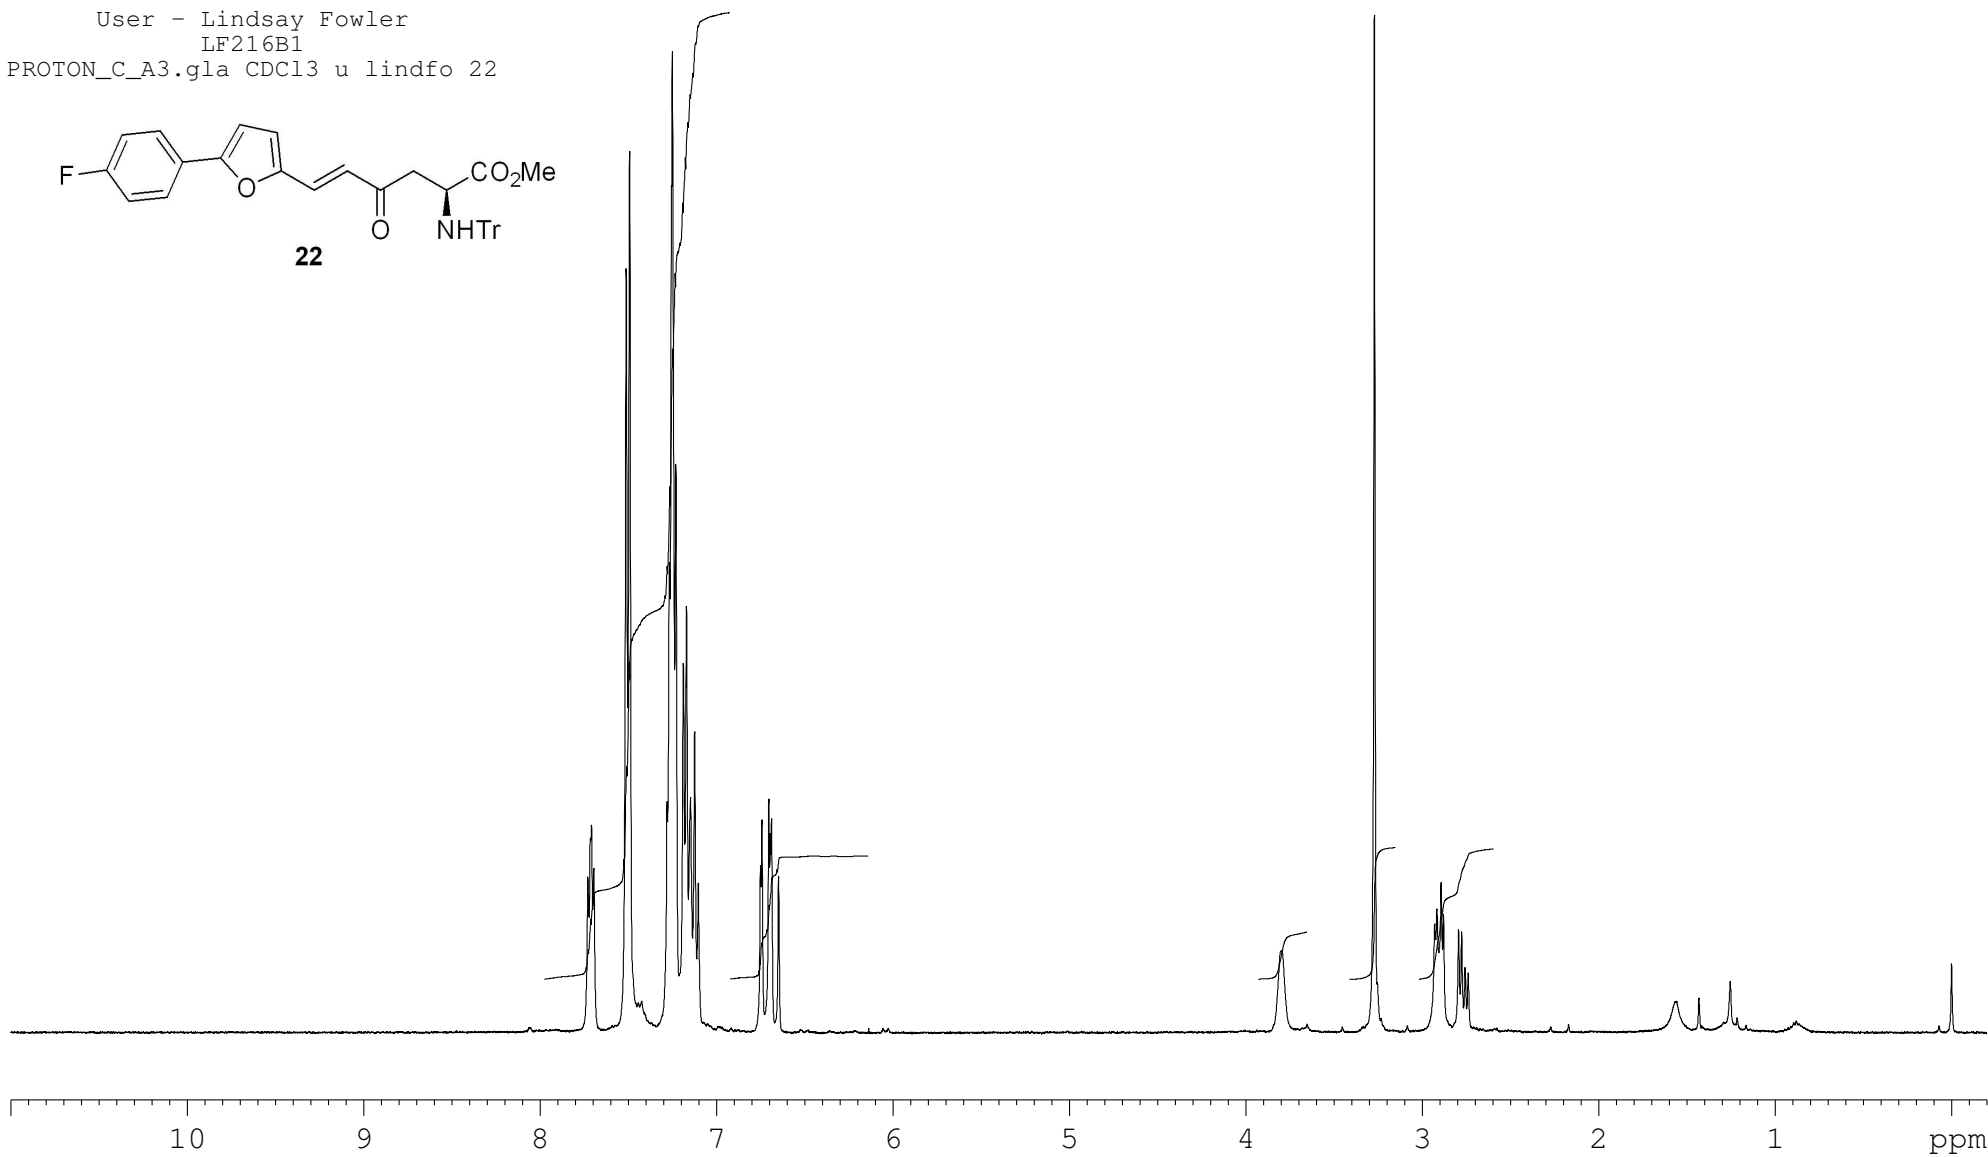

— 196.896

174.496  
164.141  
161.661  
155.646  
150.429  
145.826  
128.990  
128.870  
128.806  
128.649  
128.553  
128.178  
127.961  
127.717  
126.765  
126.674  
126.561  
126.397  
126.314  
126.179  
126.148  
123.071  
118.787  
116.199  
115.979  
107.889  
77.453  
77.337  
77.135  
76.817  
71.336

— 53.991  
— 51.991  
— 46.270

User - Lindsay Fowler  
C13CPD\_A3.gla CDC13 u lindfo 3

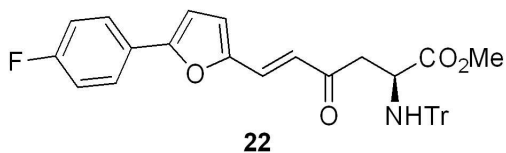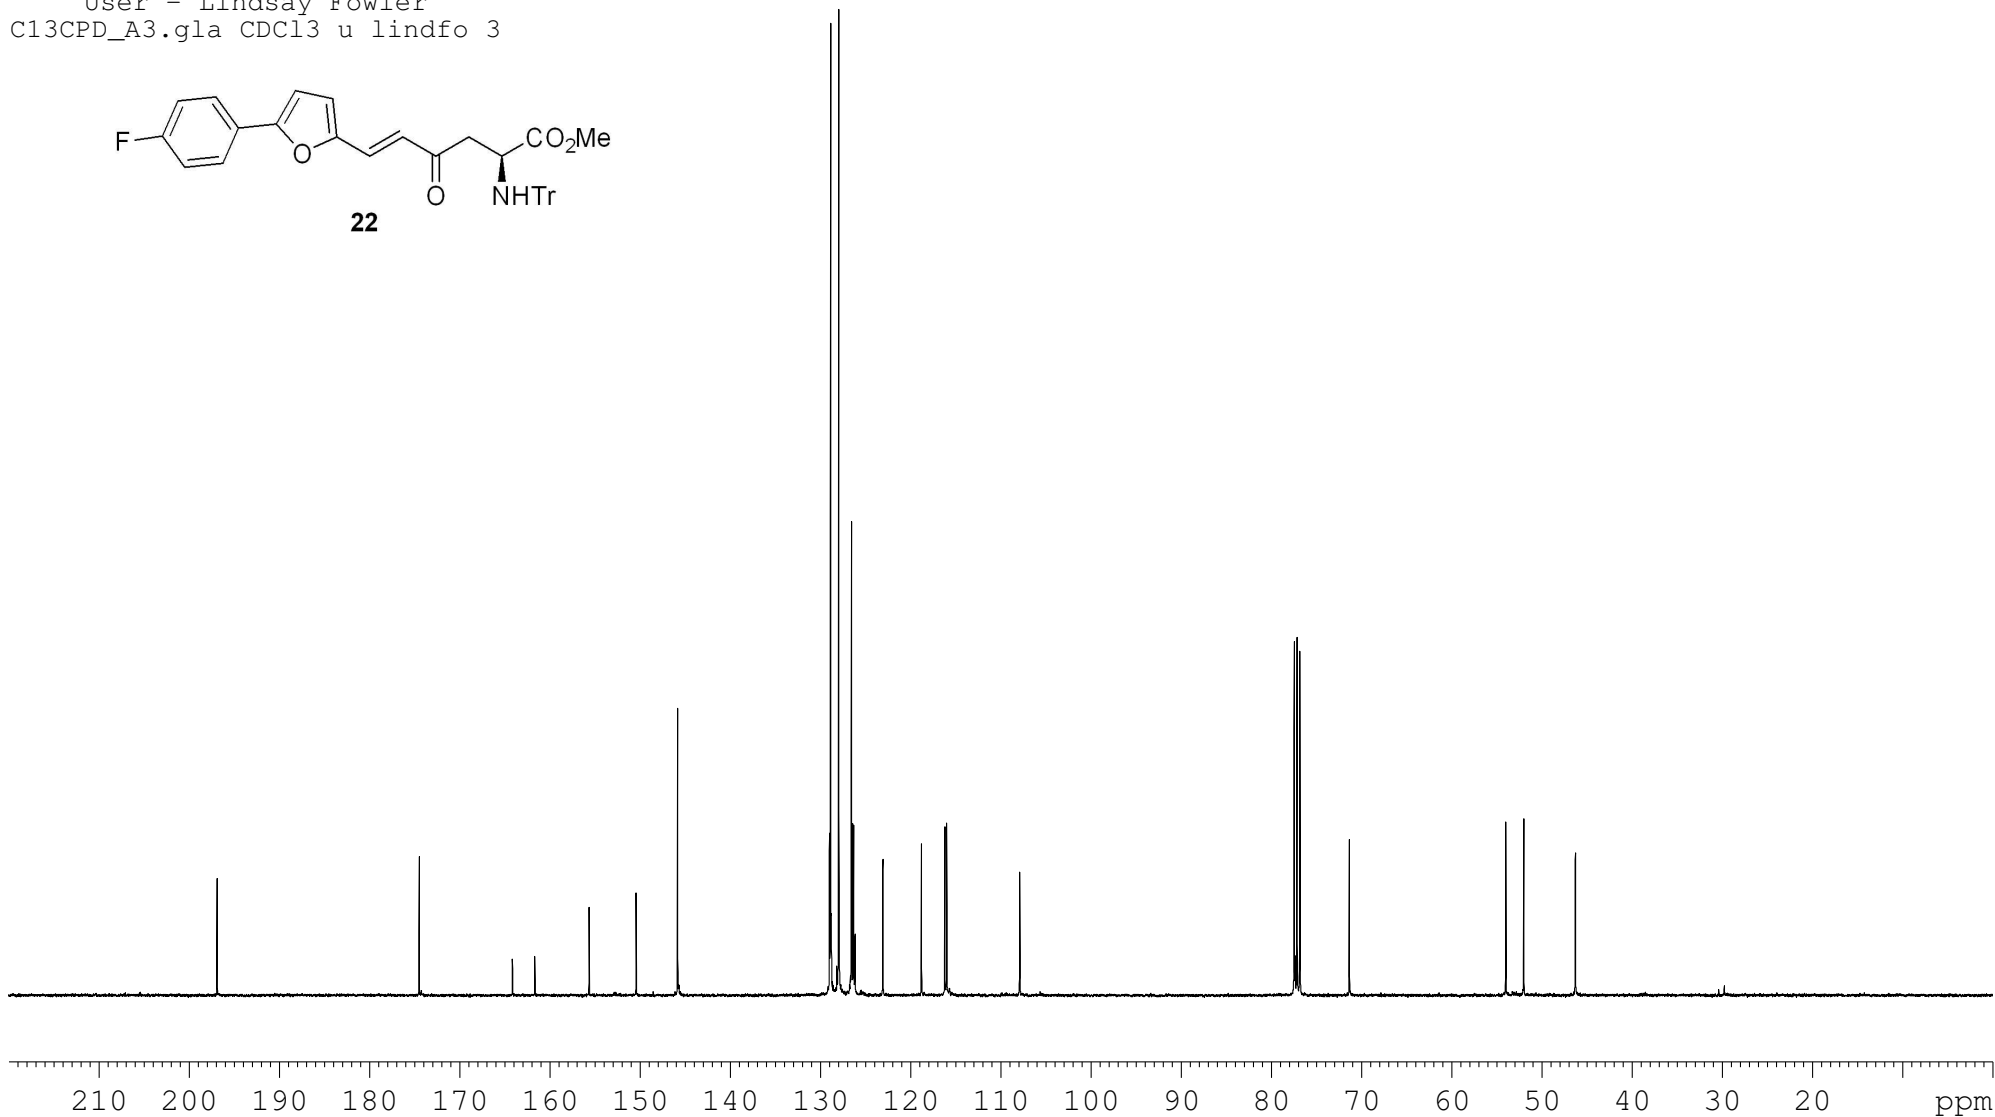

8.316  
8.277  
8.254  
8.234  
8.229  
8.162  
8.158  
8.139  
7.745  
7.725  
7.580  
7.576  
7.563  
7.560  
7.543  
7.537  
7.533  
7.515  
7.298  
7.265  
7.261  
7.248  
7.227  
7.198  
7.183  
7.165  
7.160  
7.147  
7.047  
7.027  
6.734  
6.694

3.818  
3.300  
3.002  
2.996  
2.983  
2.951  
2.902  
2.891  
2.865  
2.848  
2.828  
2.811

— 0.000

User Lindsay Fowler  
LF196B3  
PROTON\_C\_A3.gla CDC13 u lindfo 12

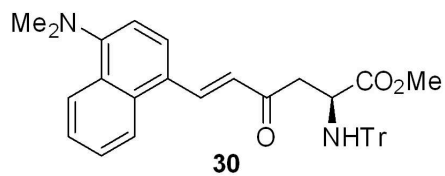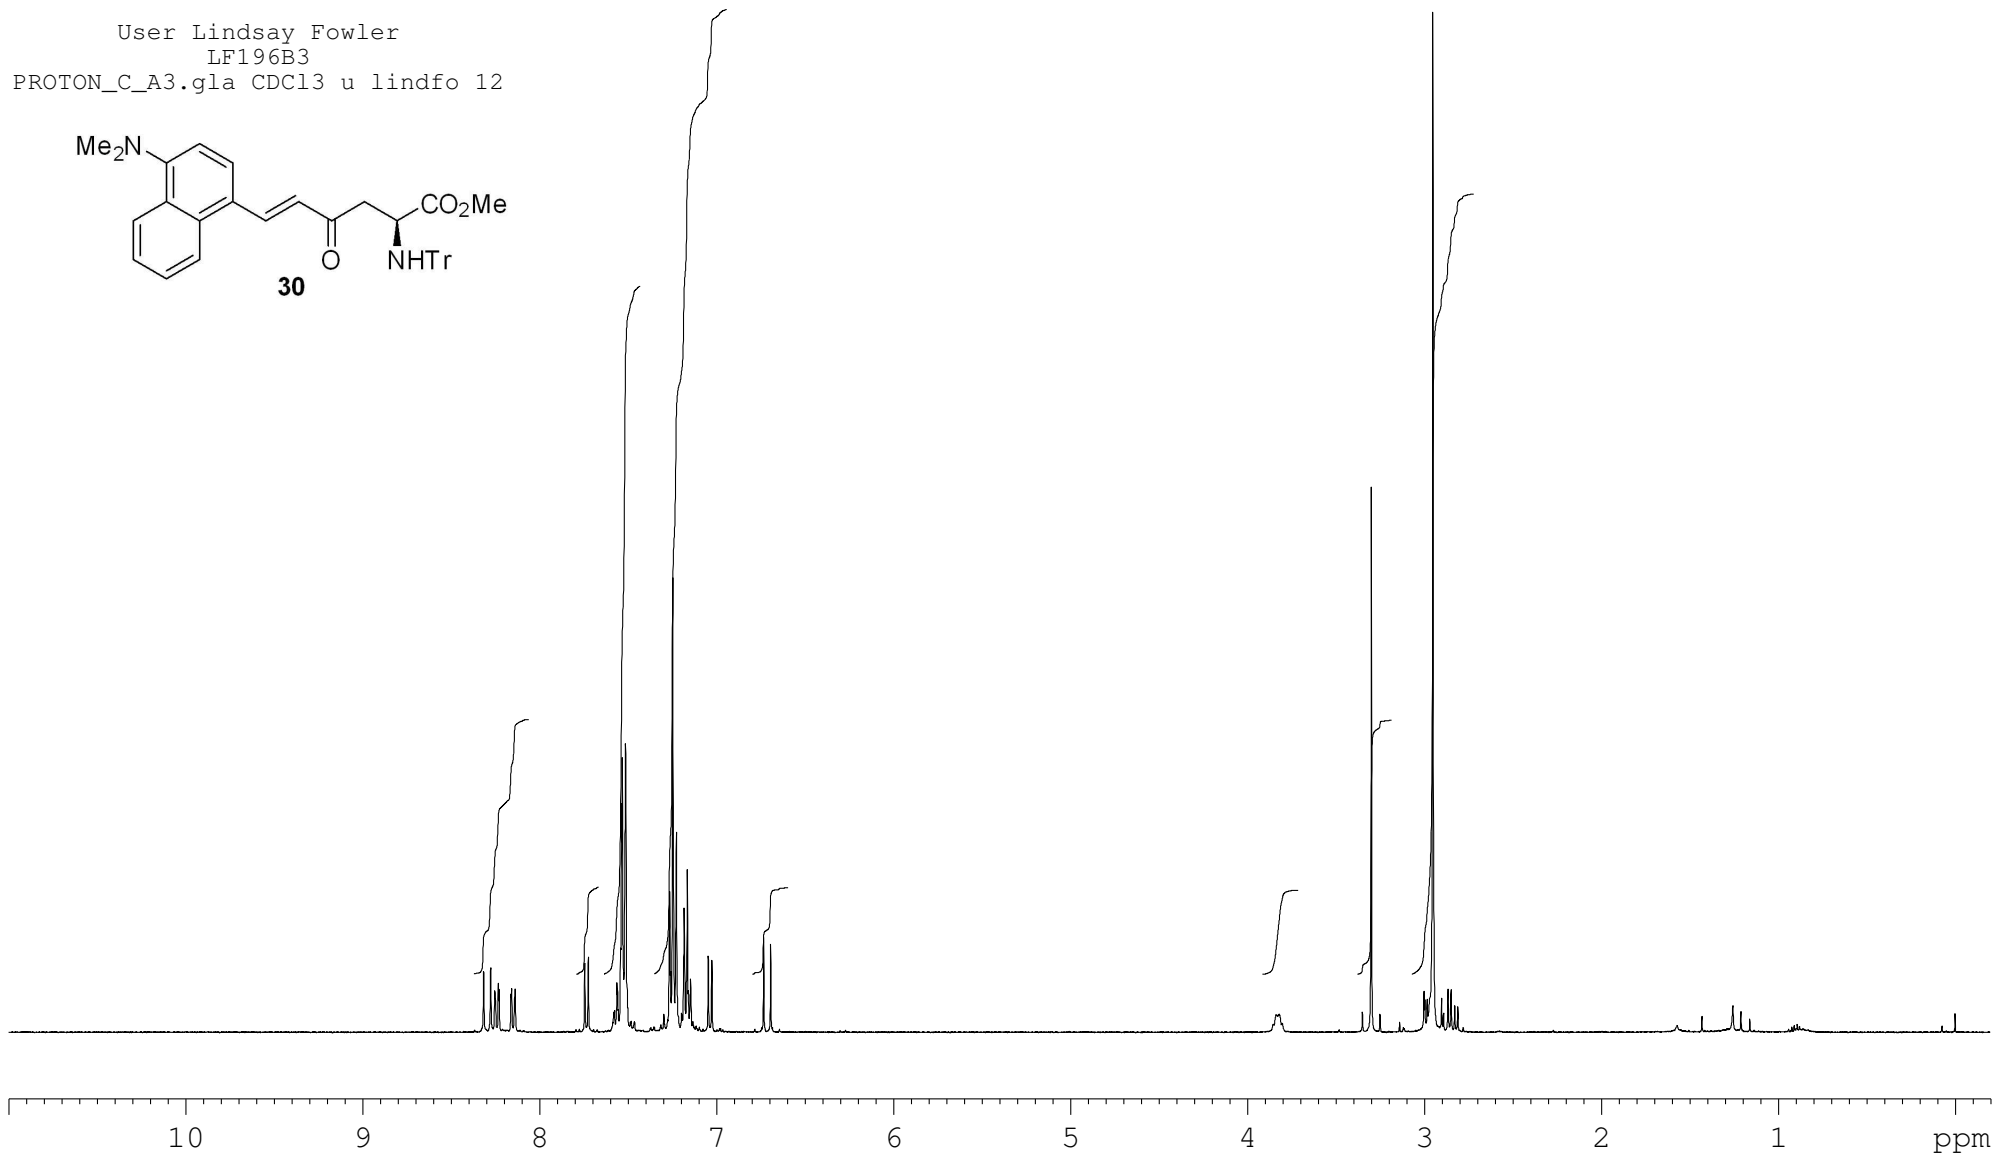

—197.414

—174.657

153.762  
145.848  
140.200  
133.080  
128.859  
128.357  
127.926  
126.847  
126.557  
126.511  
125.843  
125.415  
125.274  
125.197  
123.592  
113.349

77.358  
77.244  
77.041  
76.723  
71.305

53.966  
51.977  
45.805  
44.917

User Lindsay Fowler  
LF196B3  
C13CPD\_A3.gla CDCl3 u lindfo 12

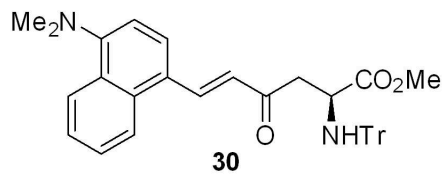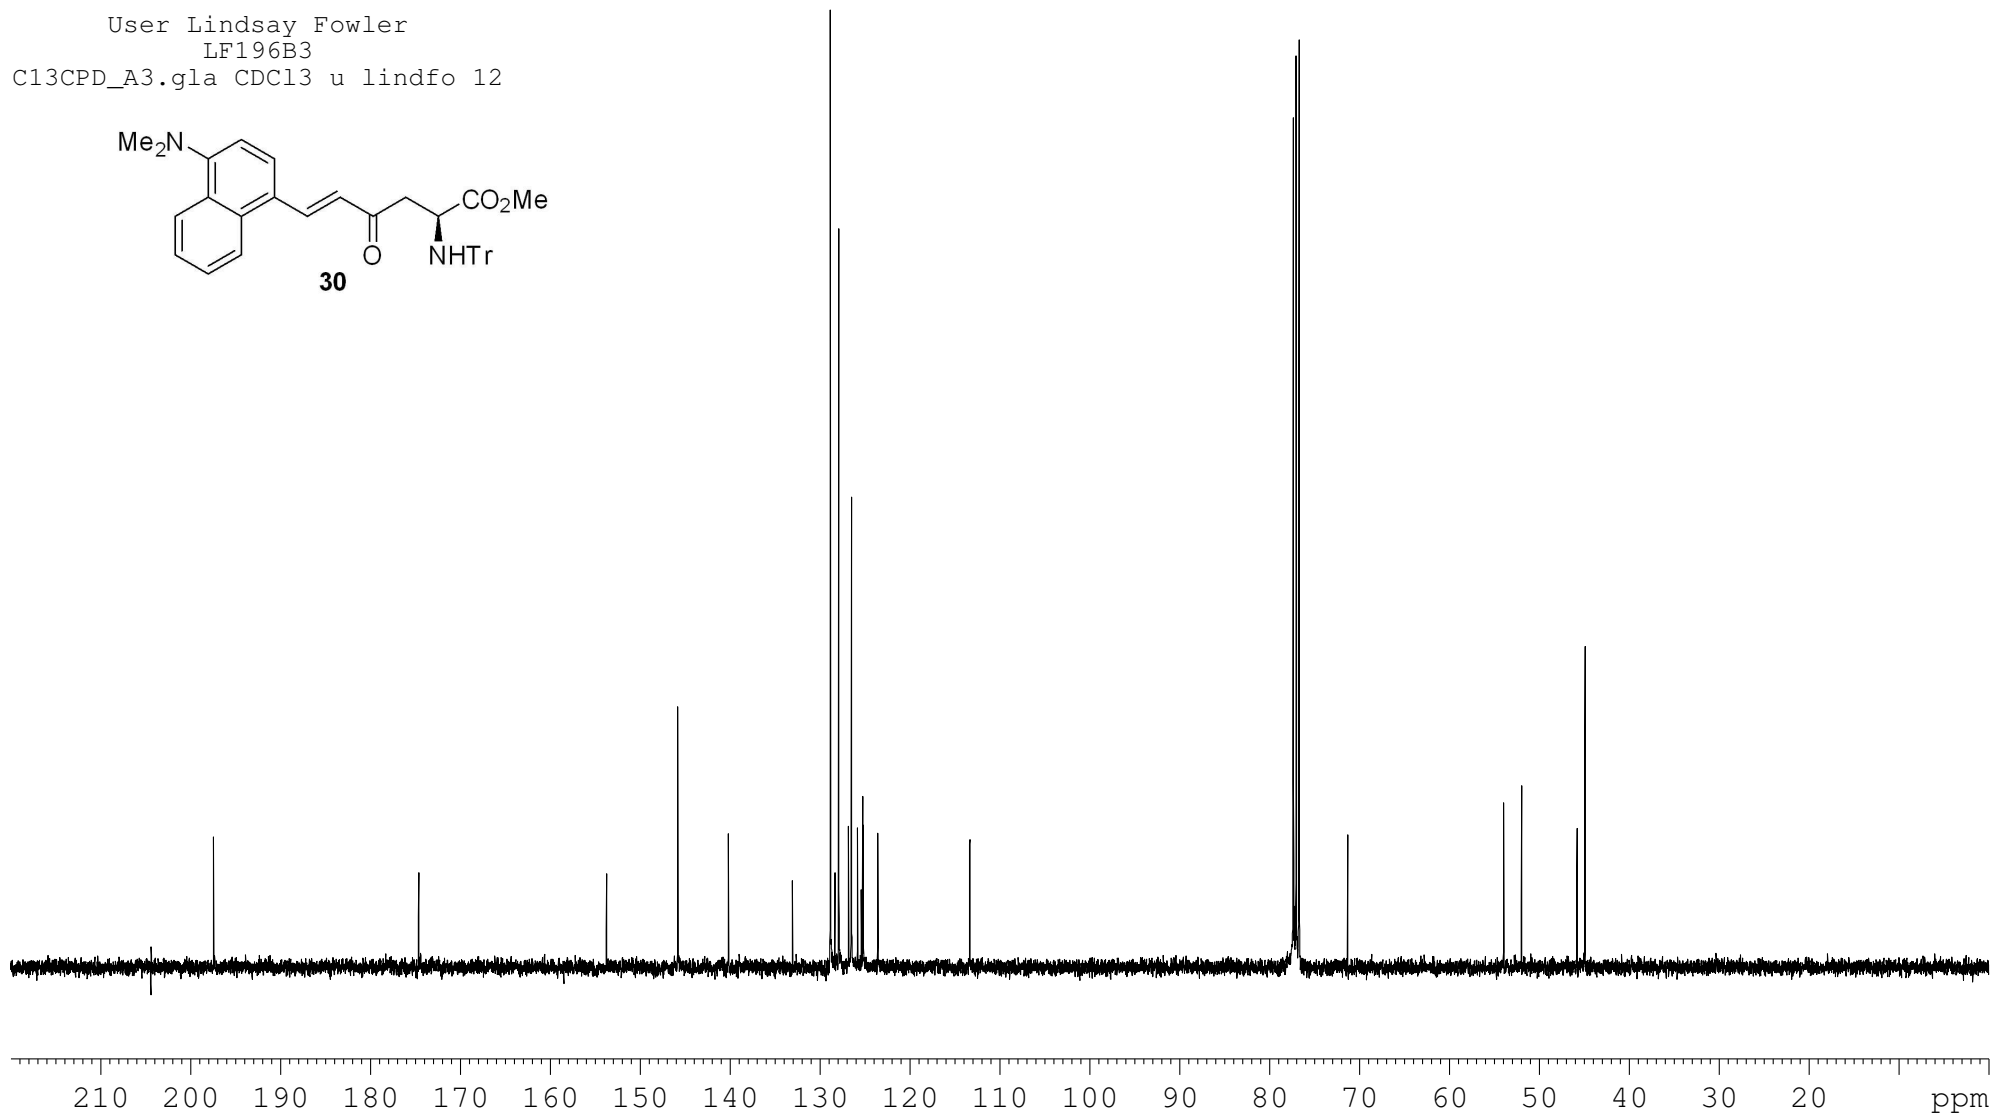

7.588  
7.554  
7.548  
7.540  
7.530  
7.517  
7.411  
7.406  
7.398  
7.394  
7.384  
7.370  
7.361  
7.287  
6.730  
6.689  
5.639  
5.617  
4.648  
4.637  
4.626  
4.615  
4.605  
3.744  
3.476  
3.465  
3.431  
3.420  
3.267  
3.256  
3.222  
3.211  
1.445  
0.000

User Lindsay Fowler  
LF173B1  
PROTON\_C\_A3.gla CDCl3 u lindfo 13

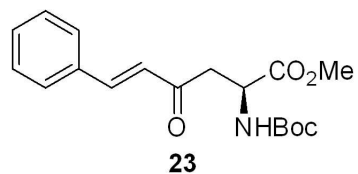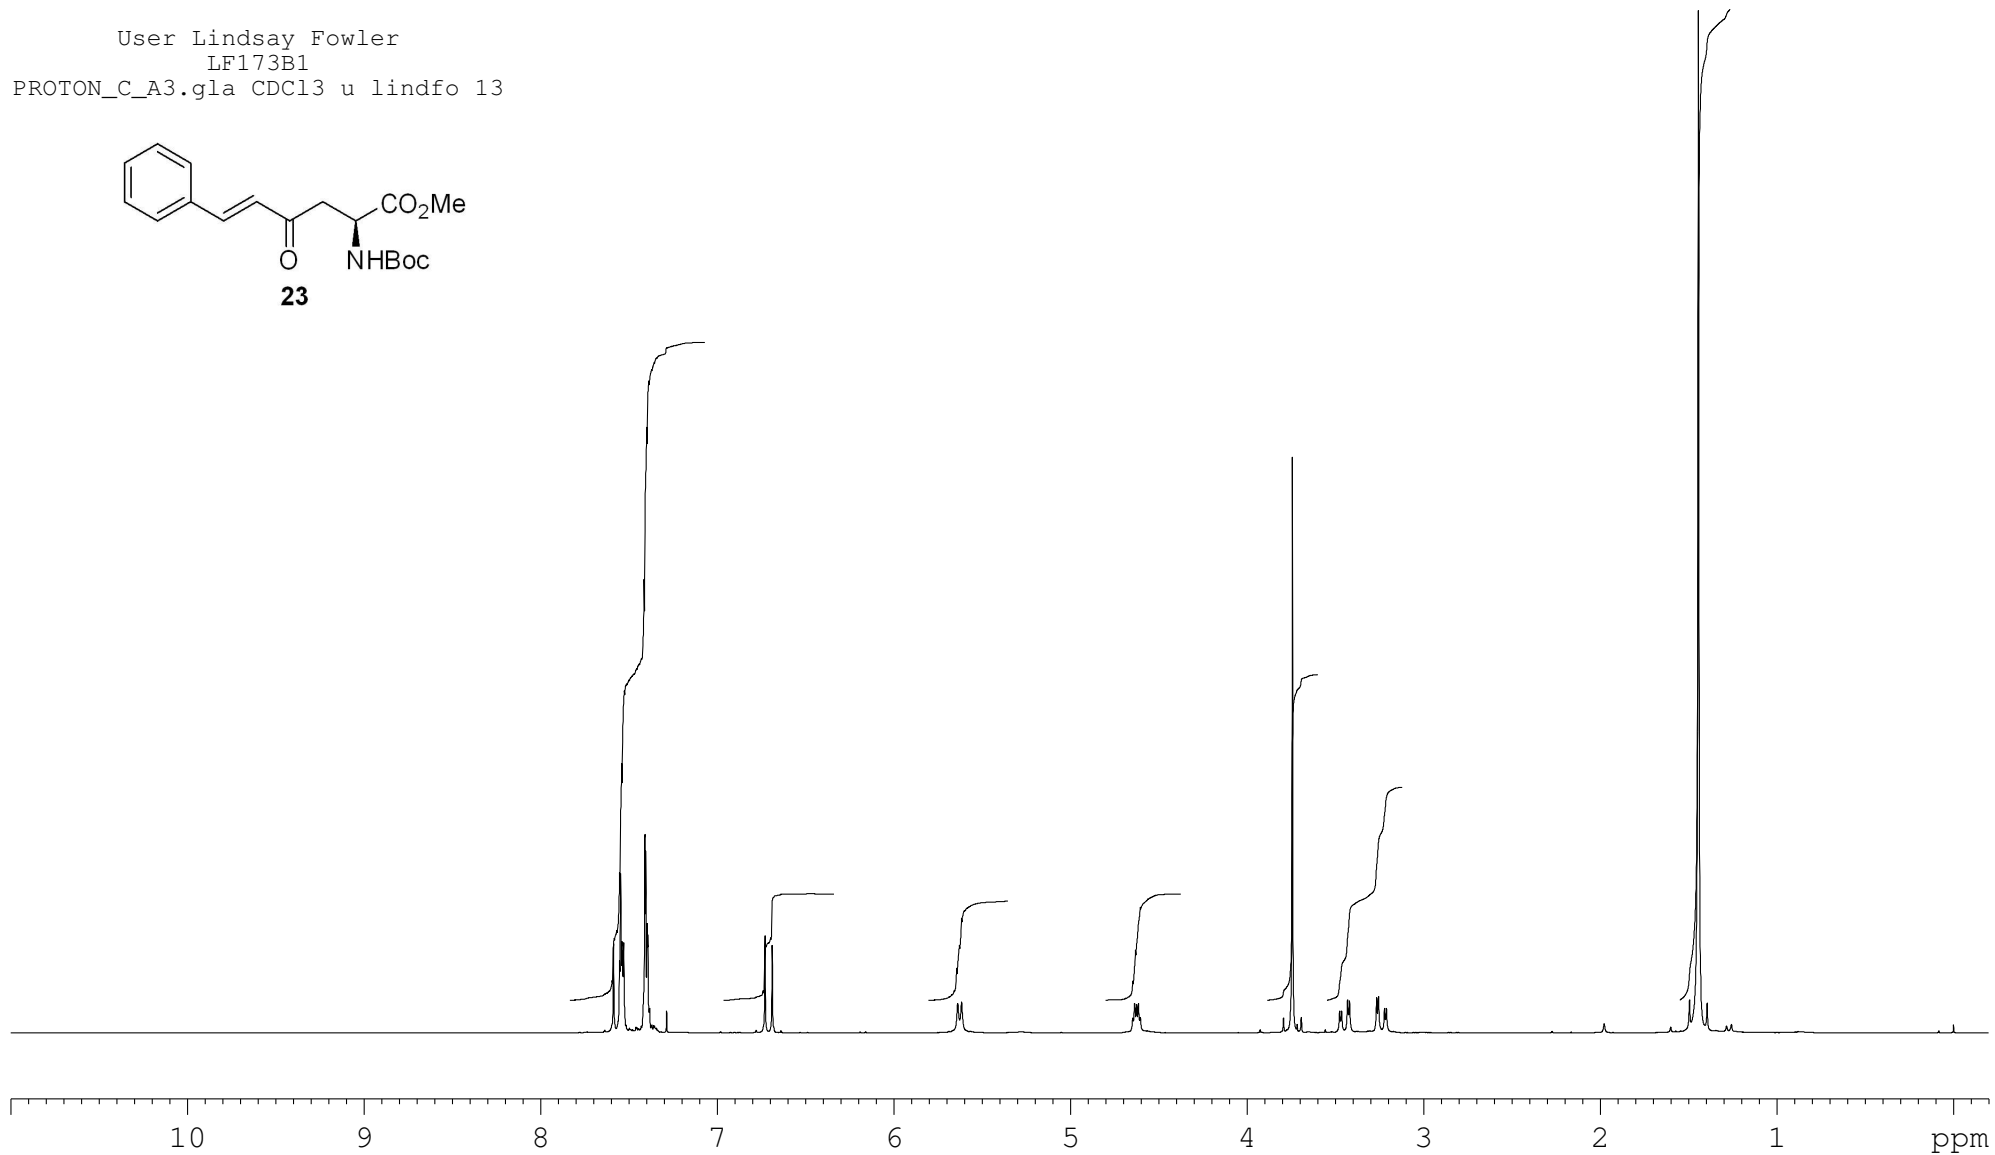

— 197.615

— 171.984

— 155.559

143.918

134.117

130.841

130.589

129.229

129.011

128.825

128.678

128.572

128.421

125.585

79.923

77.452

77.336

77.134

76.815

— 52.580

— 49.627

— 42.430

28.497

28.311

28.105

User - Lindsay Fowler  
LF173B1  
C13CPD\_A3.gla CDC13 u lindfo 6

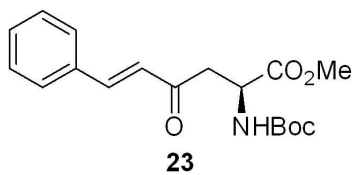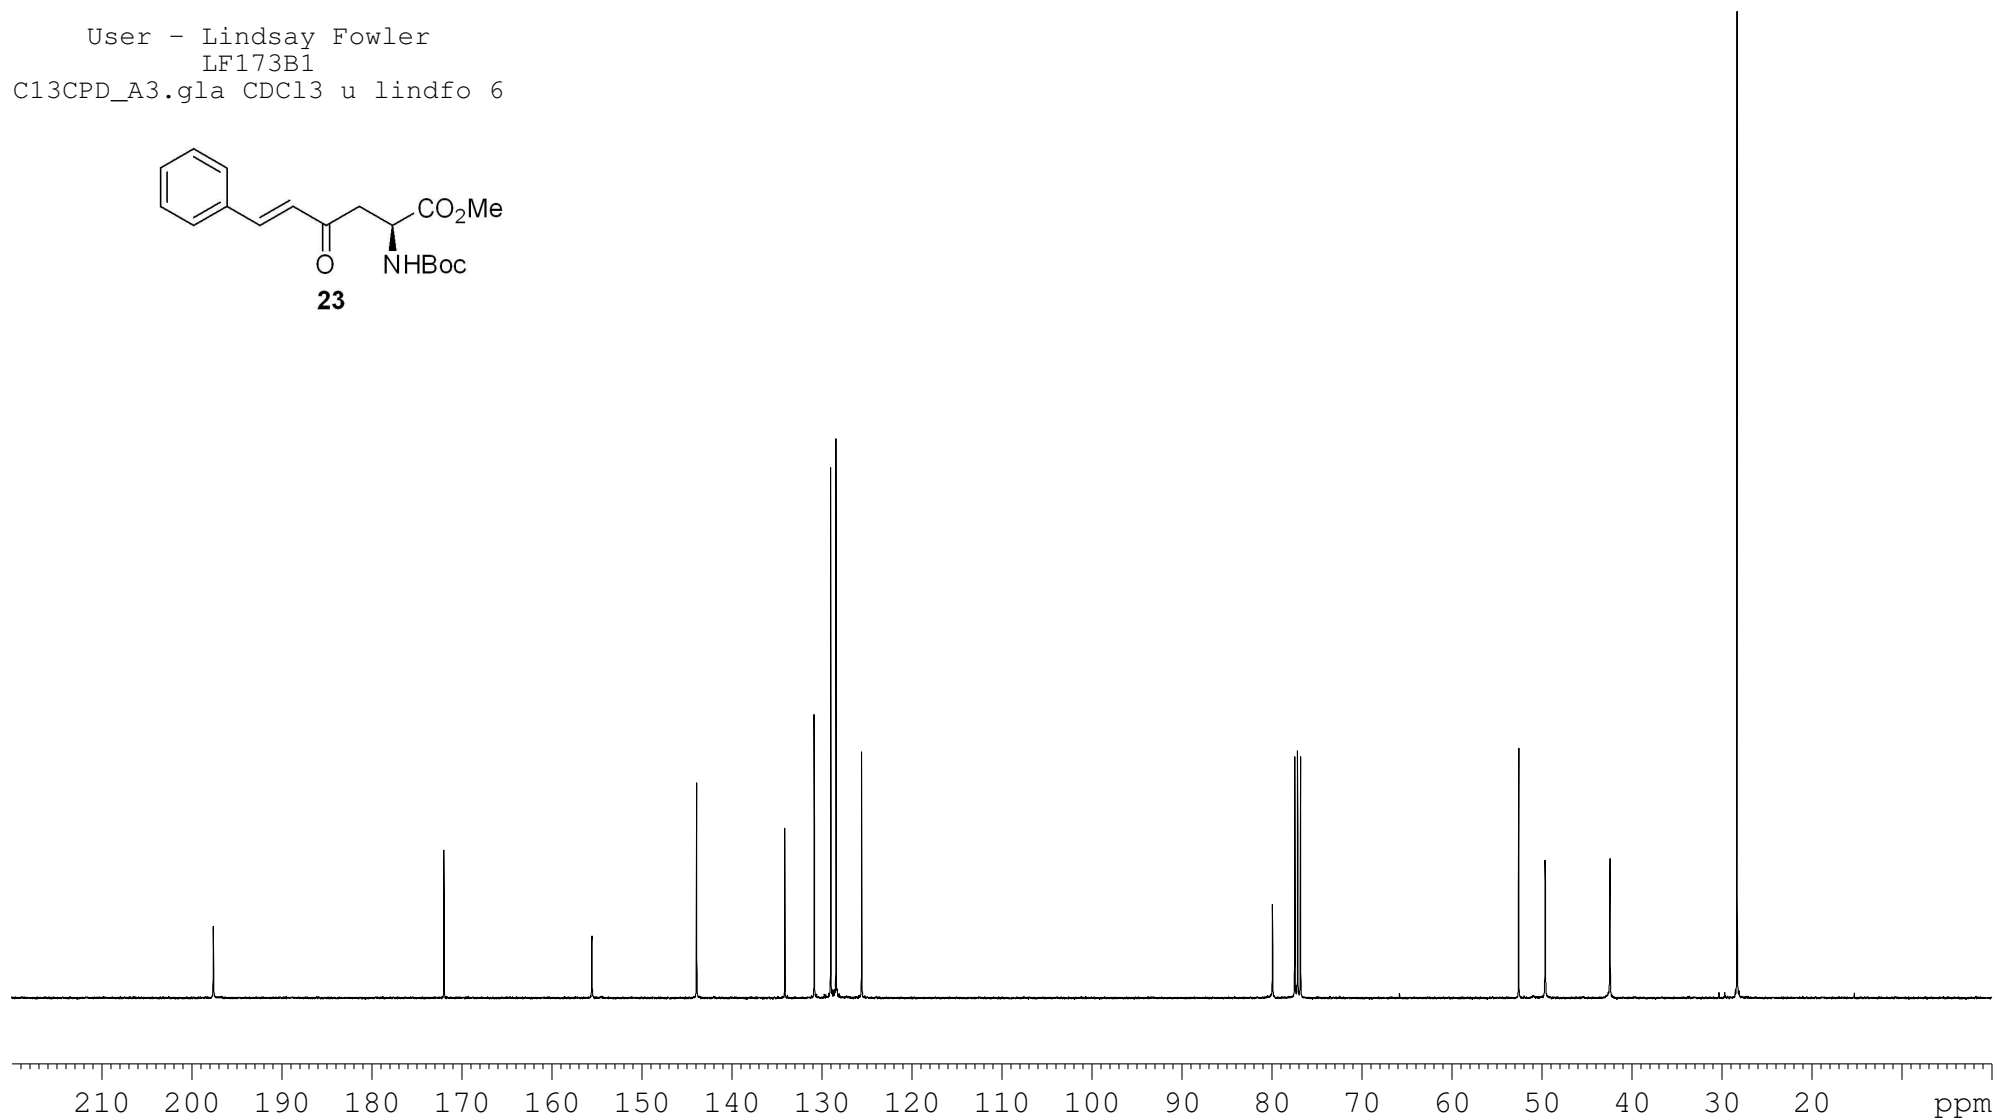

7.548  
7.528  
7.474  
7.413  
7.393  
7.261  
6.709  
6.668

5.570  
5.550

4.607

3.748  
3.444  
3.399  
3.244  
3.201

1.442

0.000

User - Lindsay Fowler  
LF183B1  
PROTON\_C\_A3.gla CDCl3 u lindfo 18

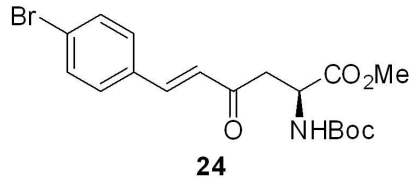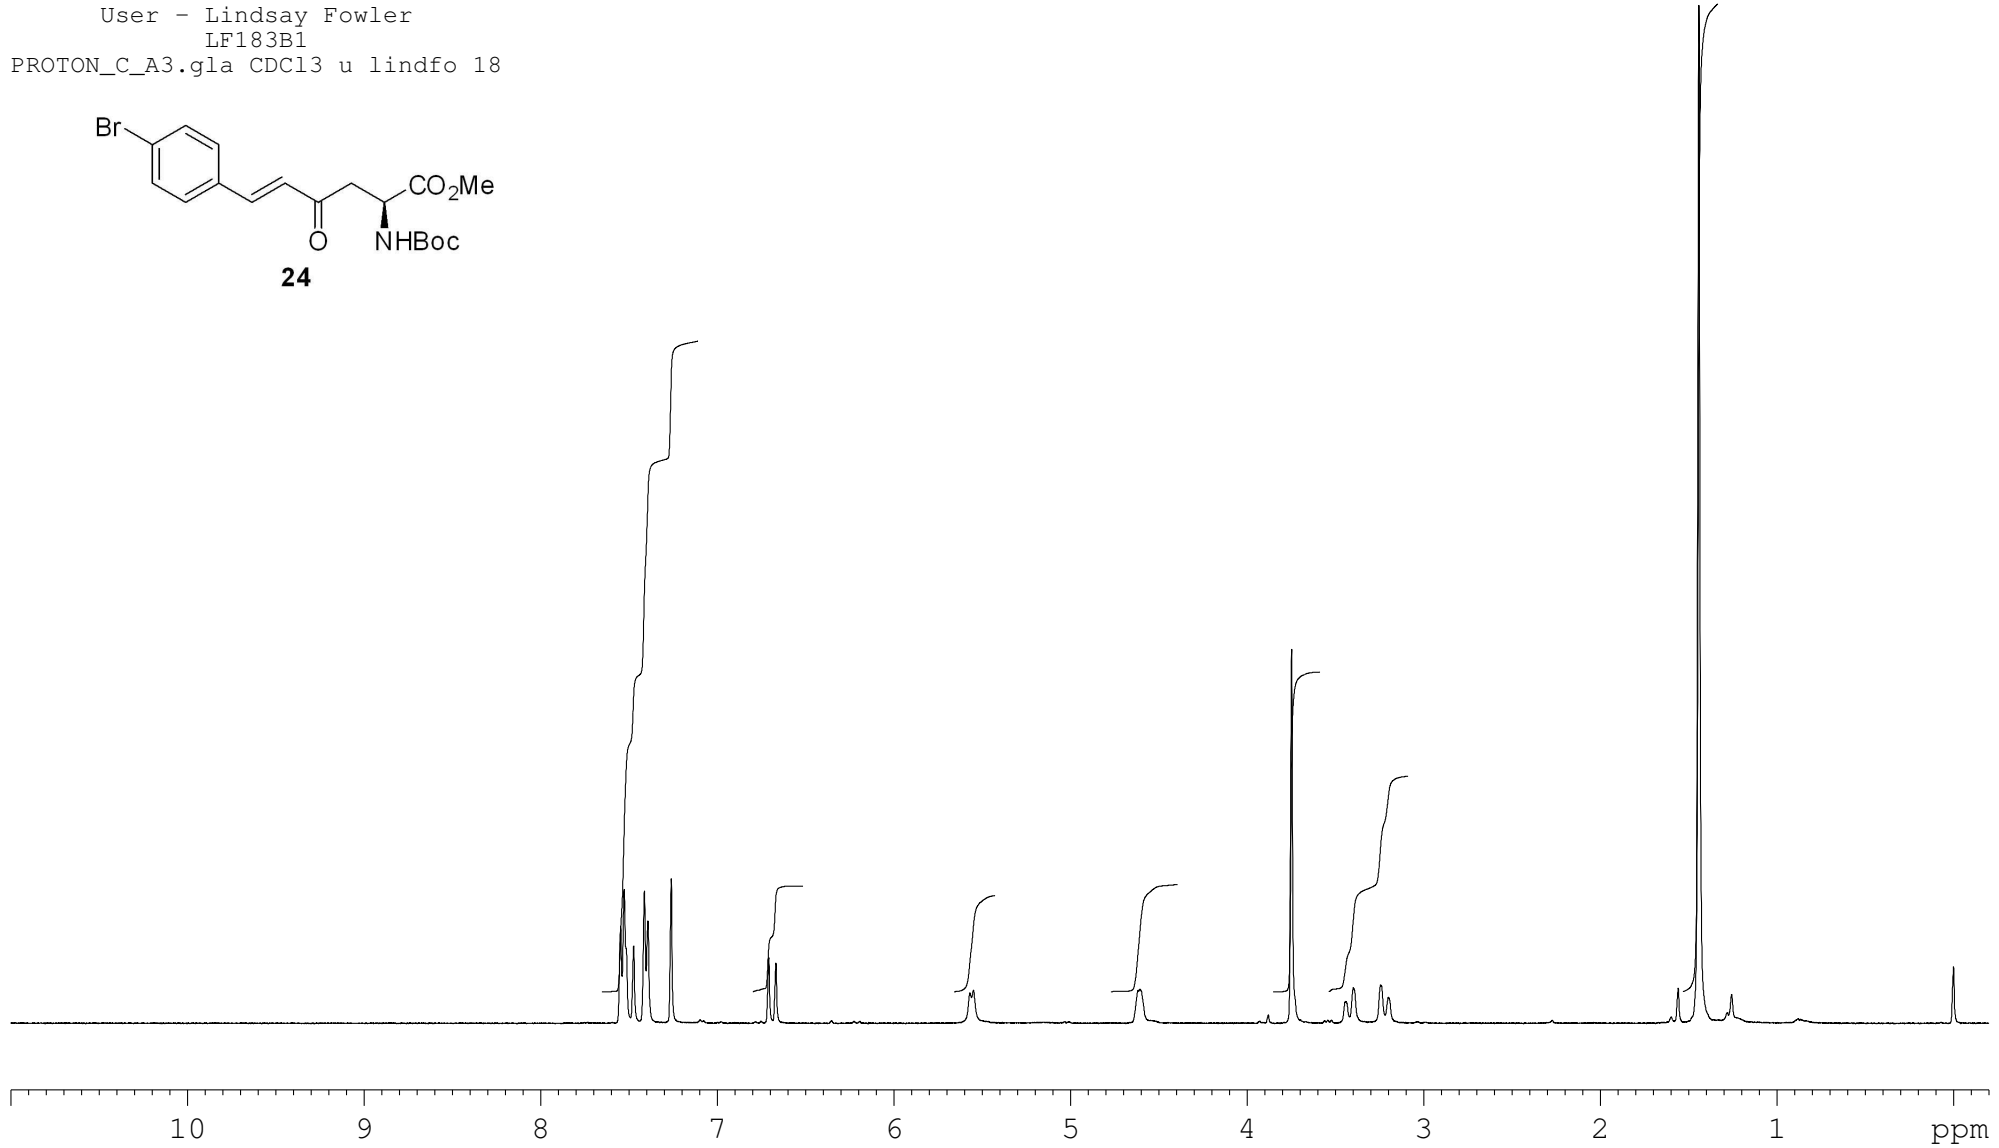

—197.494

—171.961

—155.558

—142.505

133.016

132.293

130.028

129.785

125.954

125.205

80.033

77.434

77.318

77.116

76.798

52.699

49.549

42.626

—28.334

User - Lindsay Fowler  
LF183B1  
C13CPD\_A3.gla CDCl3 u lindfo 6

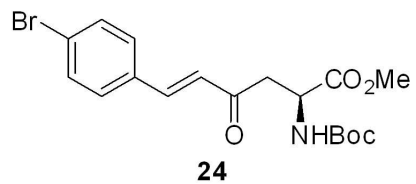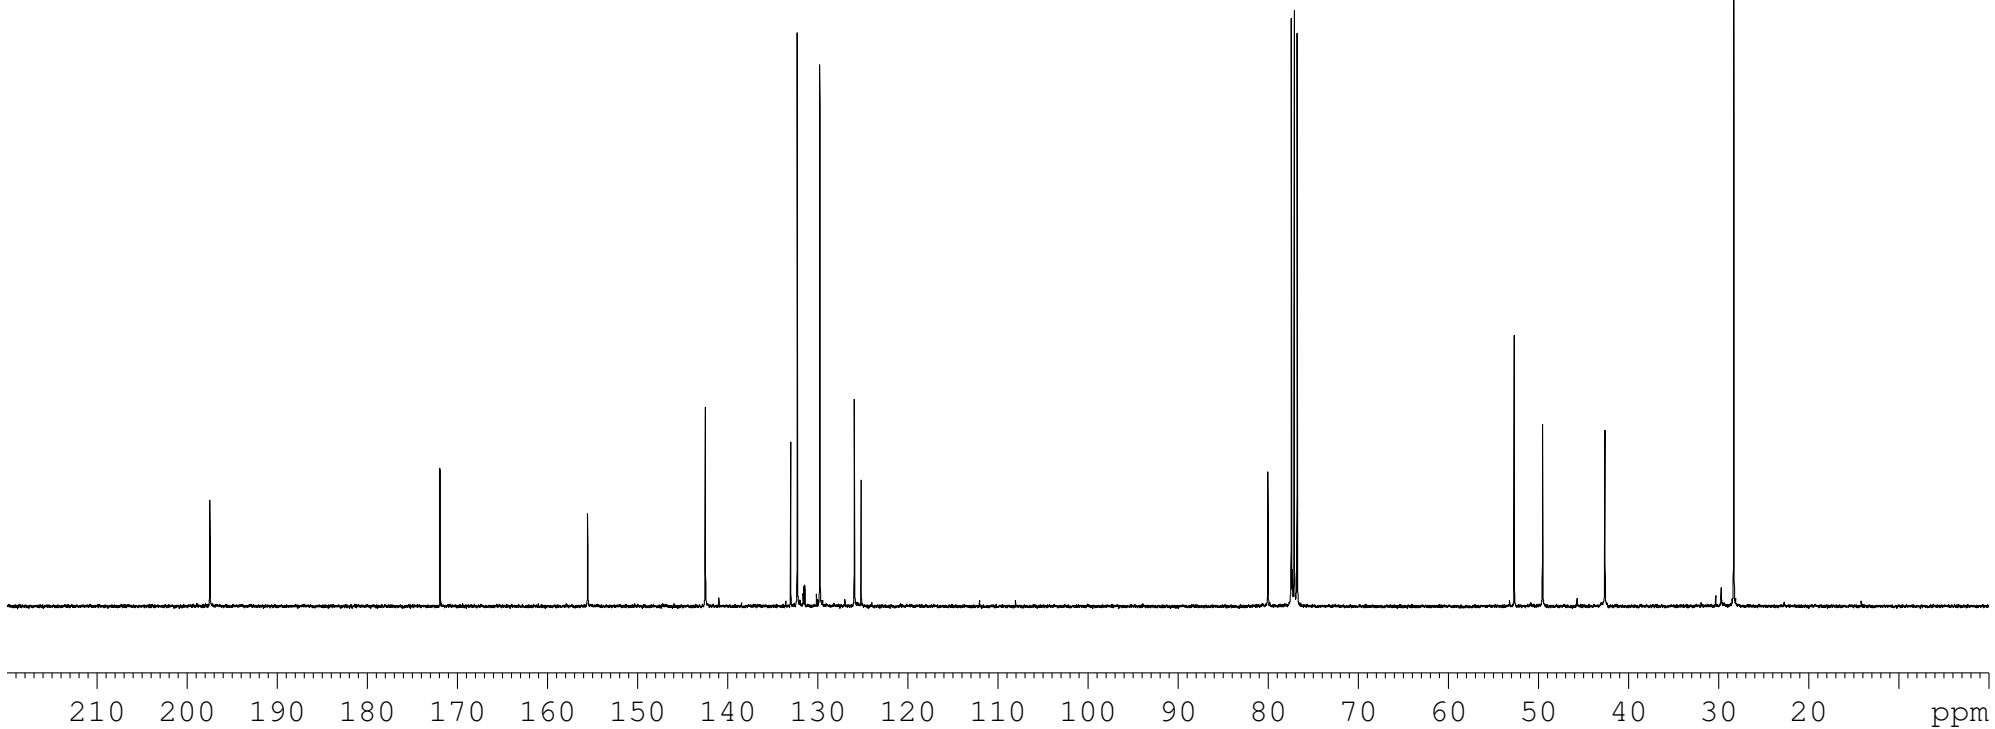



7.312  
7.308  
7.294  
7.275  
7.264  
7.244  
7.223  
7.205  
7.200  
7.180  
7.176  
7.159  
6.914  
6.897  
6.880  
6.874  
6.857  
6.840  
6.112  
6.072  
5.539  
5.517  
4.555  
4.544  
4.533  
4.533  
3.716  
3.306  
3.296  
3.261  
3.251  
3.084  
3.073  
3.039  
3.029  
2.799  
2.780  
2.760  
2.575  
2.572  
2.555  
2.538  
2.535  
2.520  
1.440  
— 0.000

User Lindsay Fowler  
LF189B1  
PROTON\_C\_A3.gla CDCl3 u lindfo 23

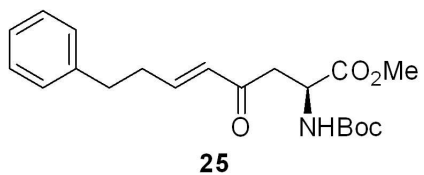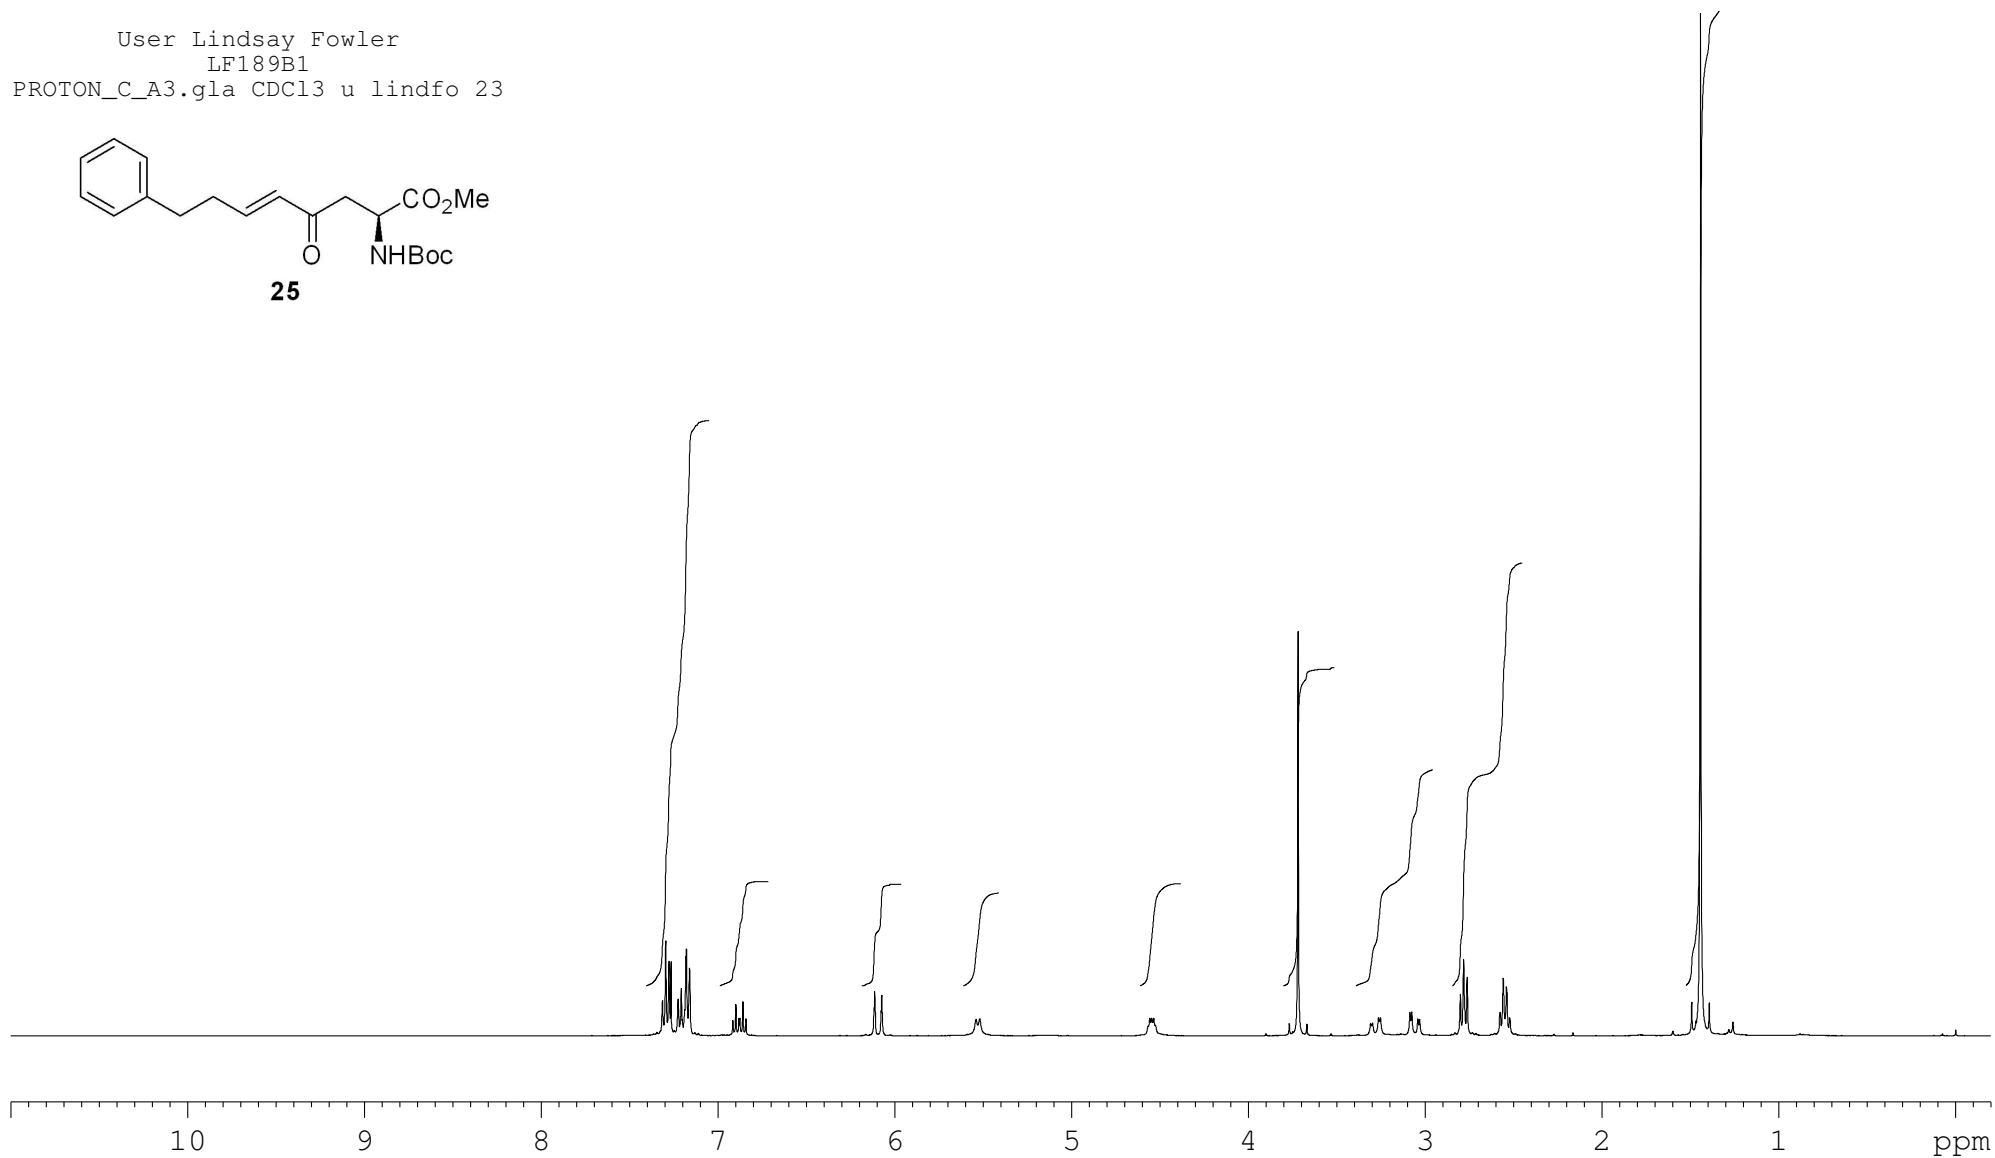

— 197.715

— 171.978

— 155.547

— 147.782

— 140.489

130.251

128.550

128.298

126.298

79.915

77.392

77.276

77.074

76.756

— 52.555

— 49.488

— 41.798

34.261

34.191

— 28.311

User Lindsay Fowler  
LF189B1  
C13CPD\_A3.gla CDC13 u lindfo 23

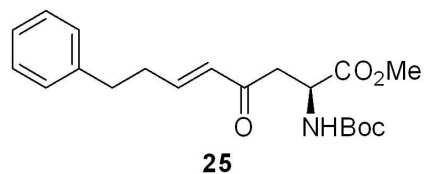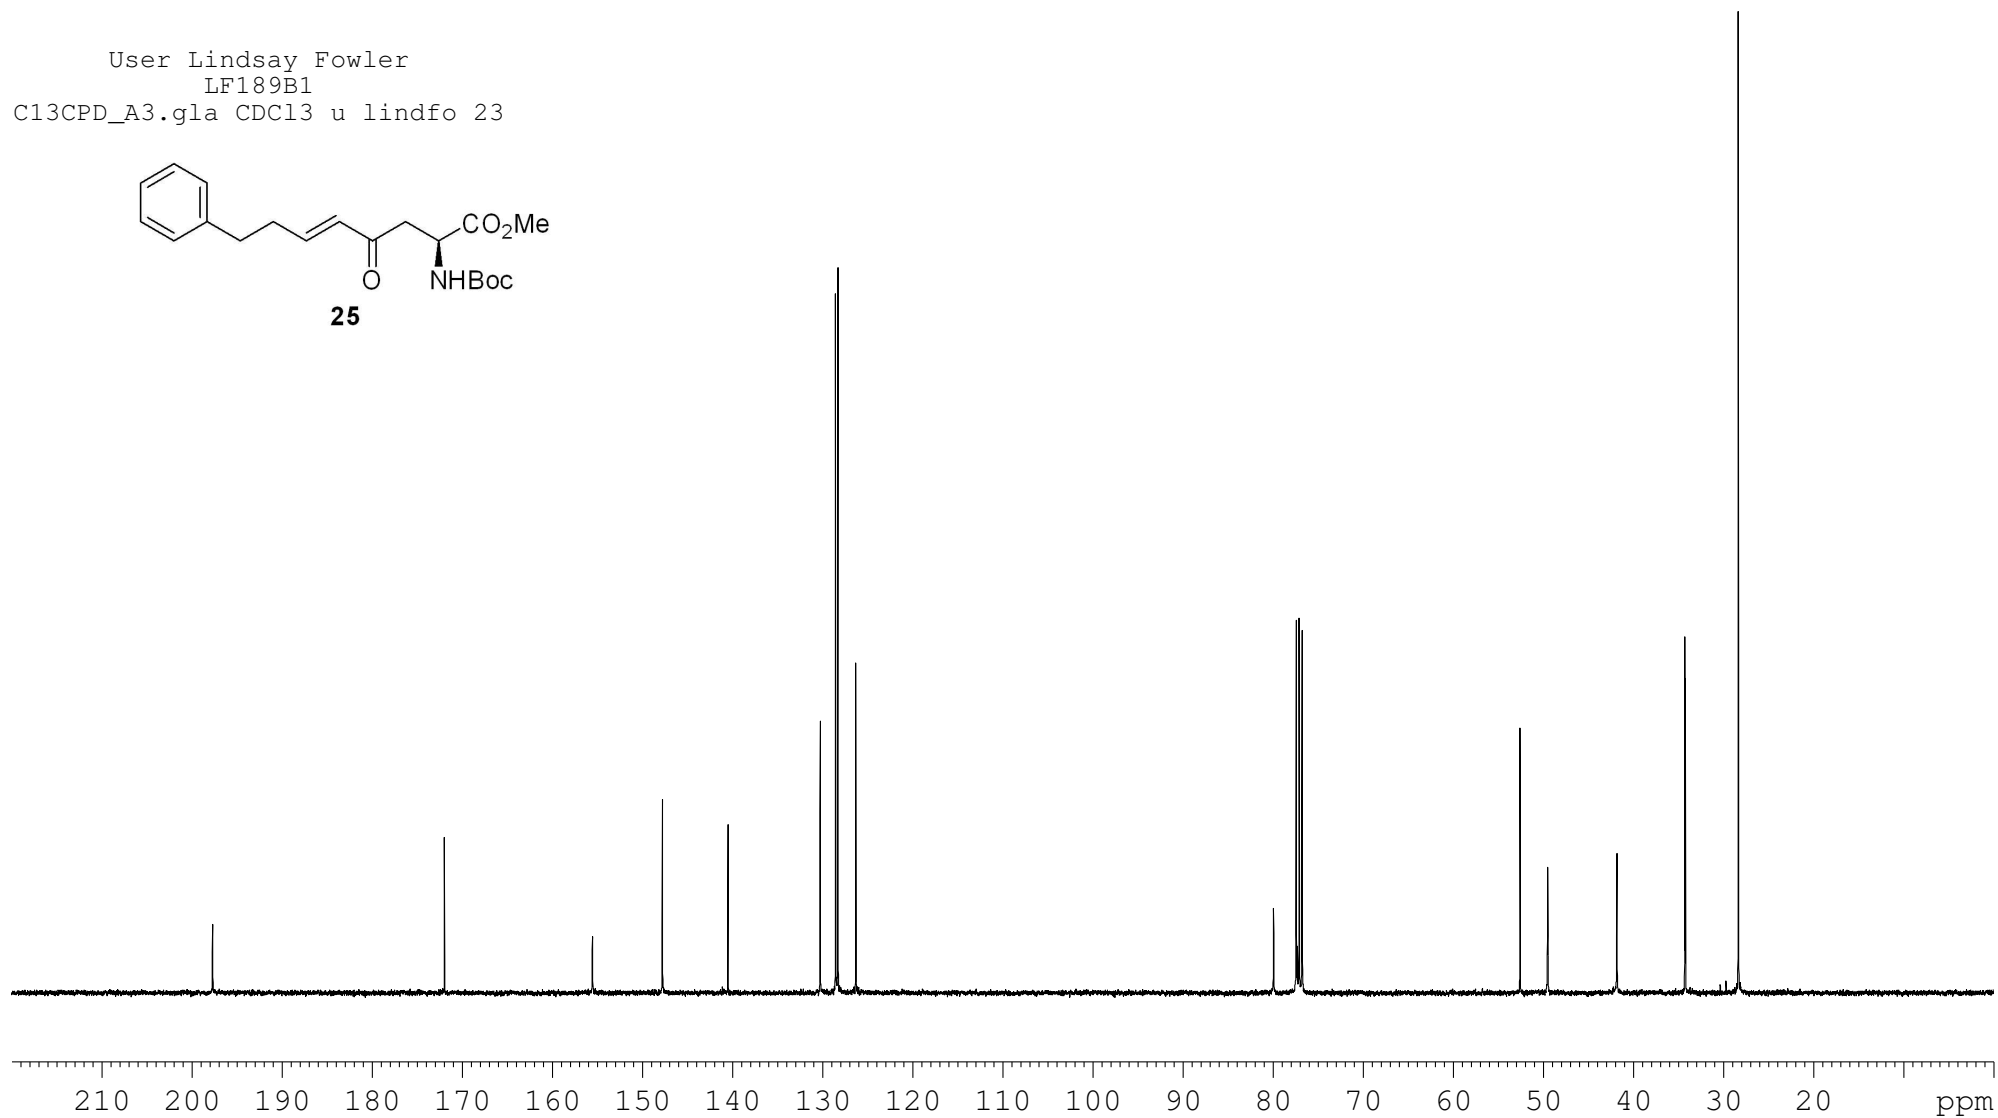

8.428  
8.389  
8.247  
8.226  
8.188  
8.167  
7.777  
7.757  
7.591  
7.574  
7.548  
7.526  
7.509  
7.262  
7.049  
7.029  
6.998  
6.768  
6.729  
5.655  
5.634  
4.660  
4.650  
4.639  
3.773  
3.744  
3.550  
3.541  
3.506  
3.496  
3.312  
3.303  
3.268  
3.258  
2.959  
2.940  
1.453  
1.417  
0.000

User - Lindsay Fowler  
LF203B1  
PROTON\_C\_A3.gla CDCl3 u lindfo 32

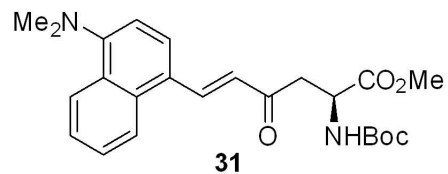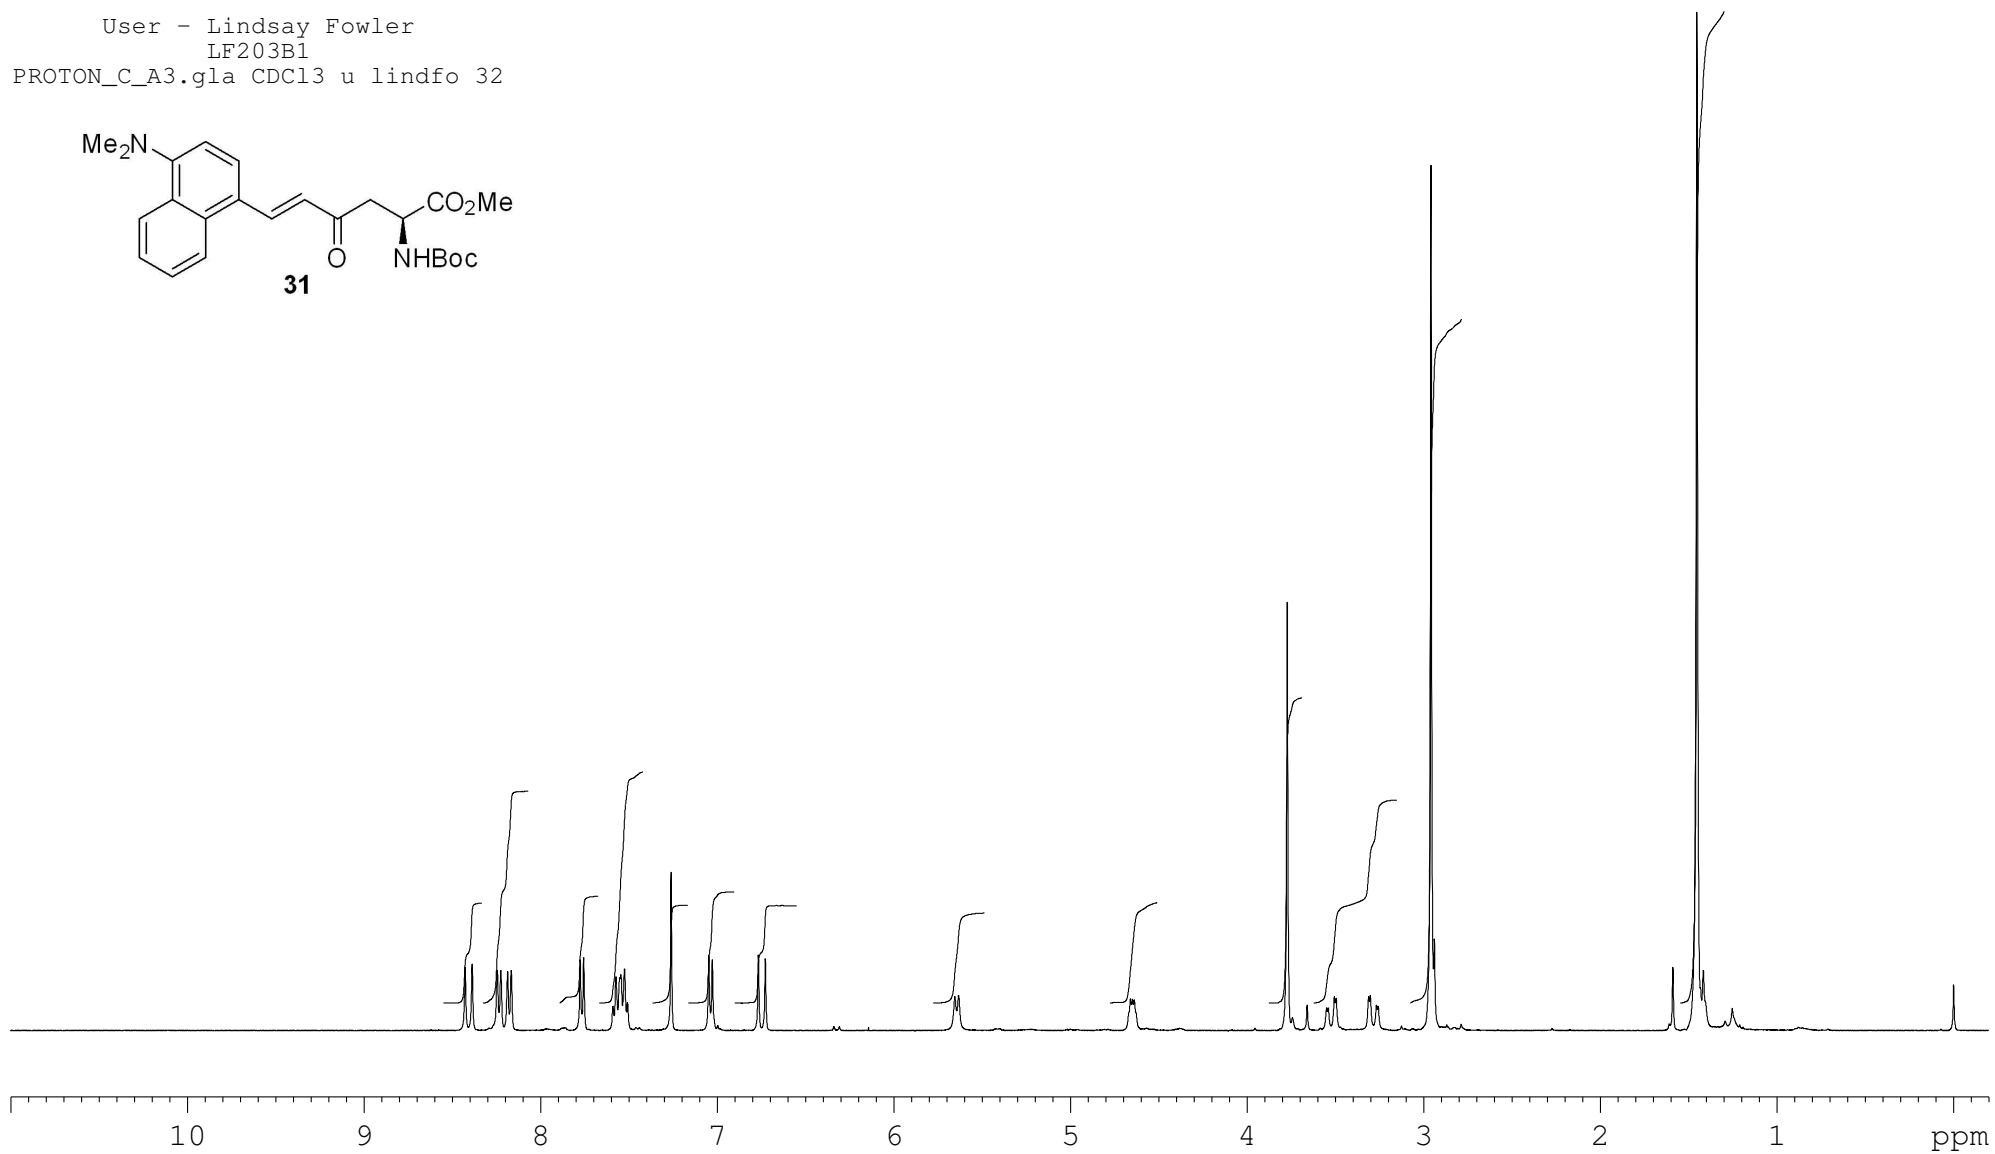

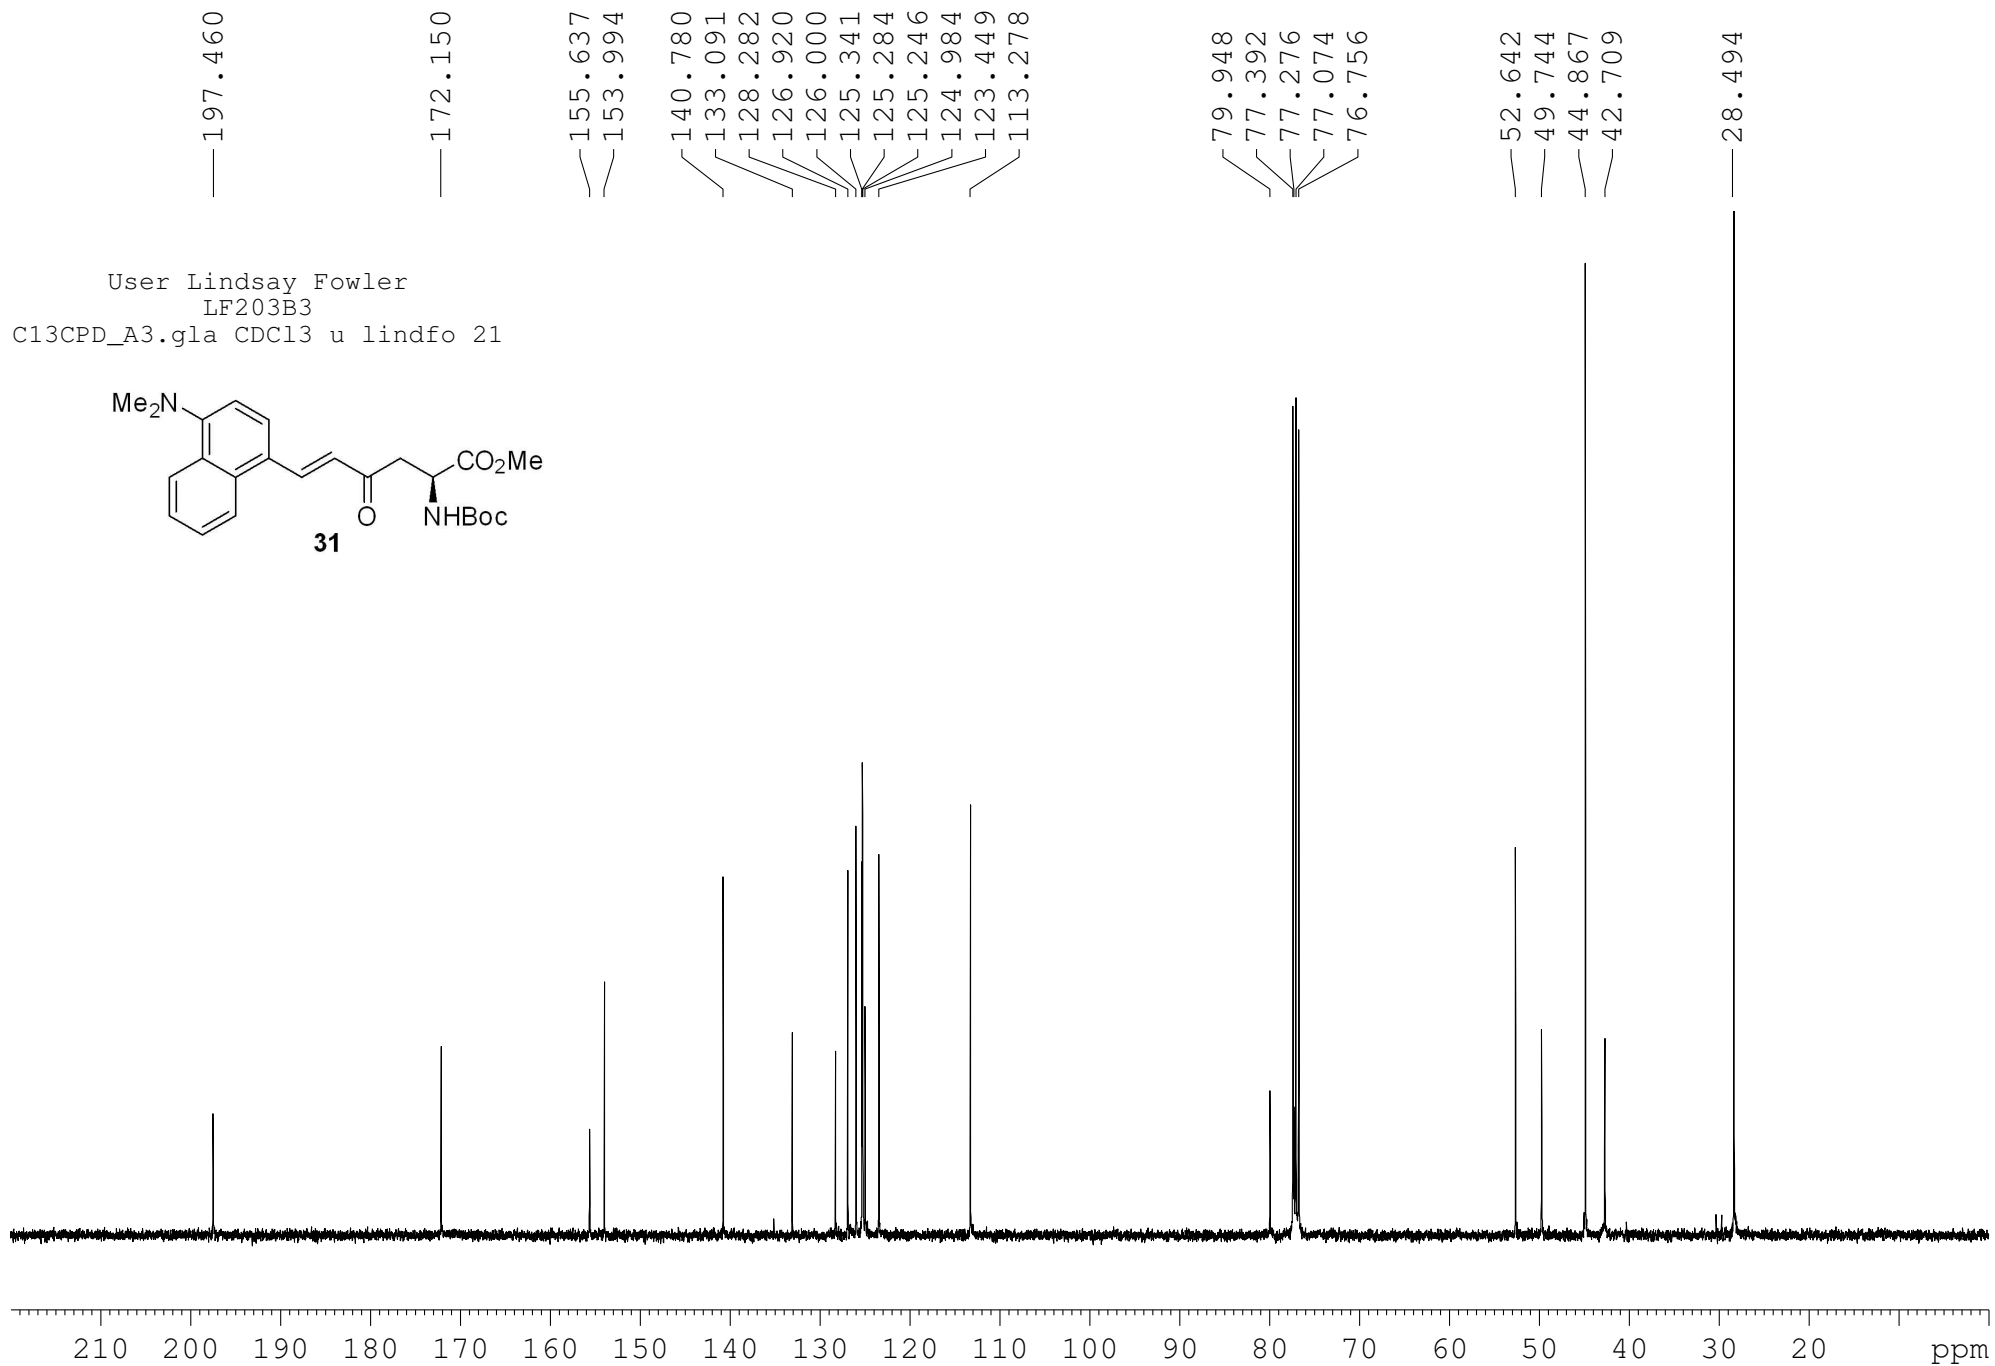

7.770  
7.729  
7.670  
7.442  
7.352  
6.933  
6.892  
  
4.930  
  
4.281  
3.523  
3.475  
3.447  
3.429  
3.400  
3.382  
3.305  
  
0.000

User - Lindsay Fowler  
LF184B1  
PROTON\_C\_A3.gla MeOD u lindfo 34

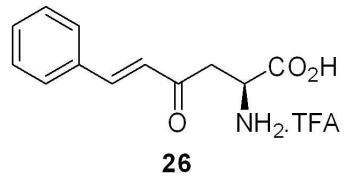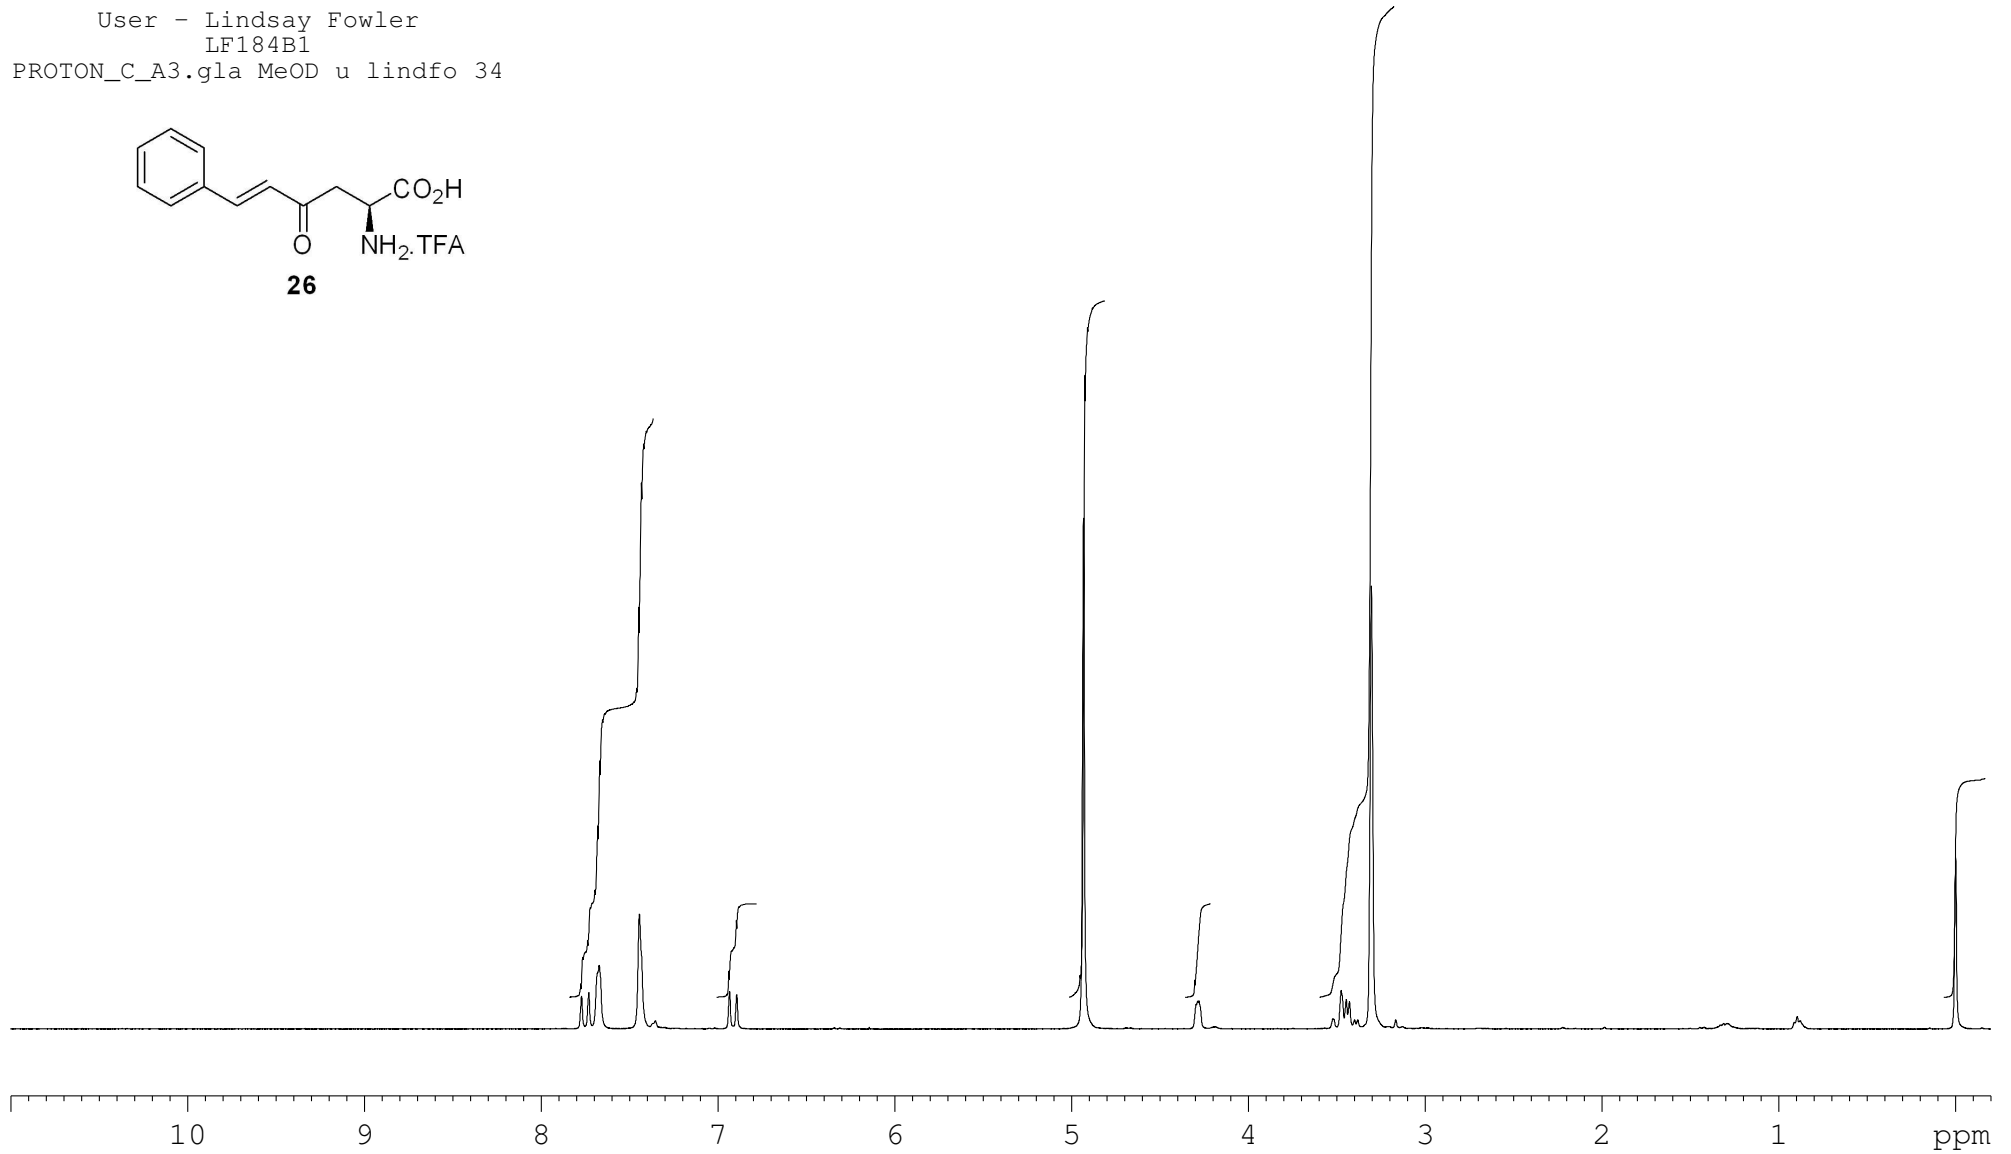

— 197.984

— 171.770

— 146.034

135.613

132.136

130.161

129.720

126.058

50.242

49.672

49.458

49.245

49.032

48.819

48.606

48.393

40.877

User Lindsay Fowler  
LF184B1  
C13CPD\_A3.gla MeOD u lindfo 22

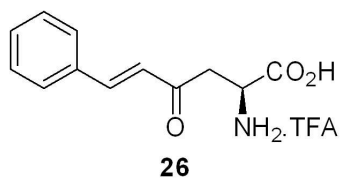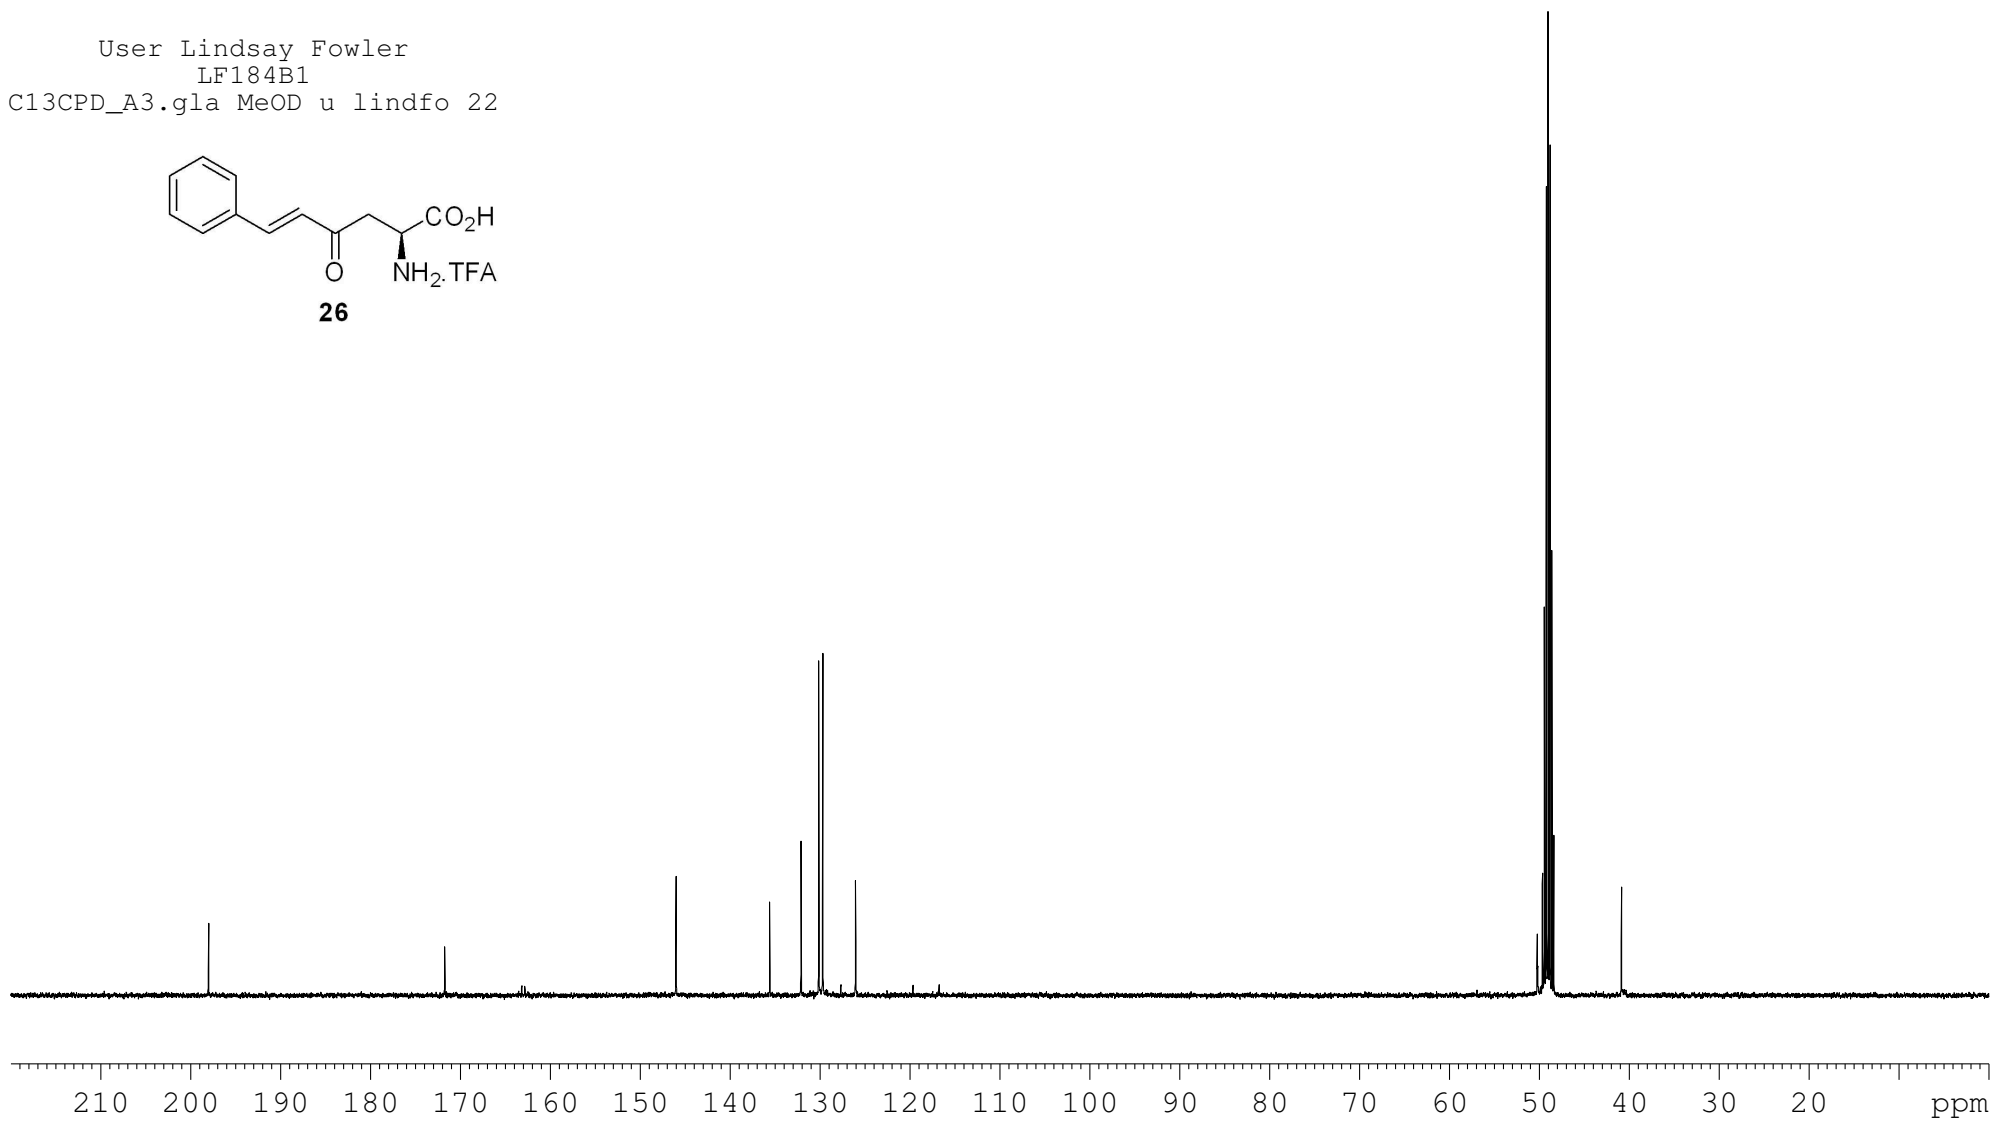

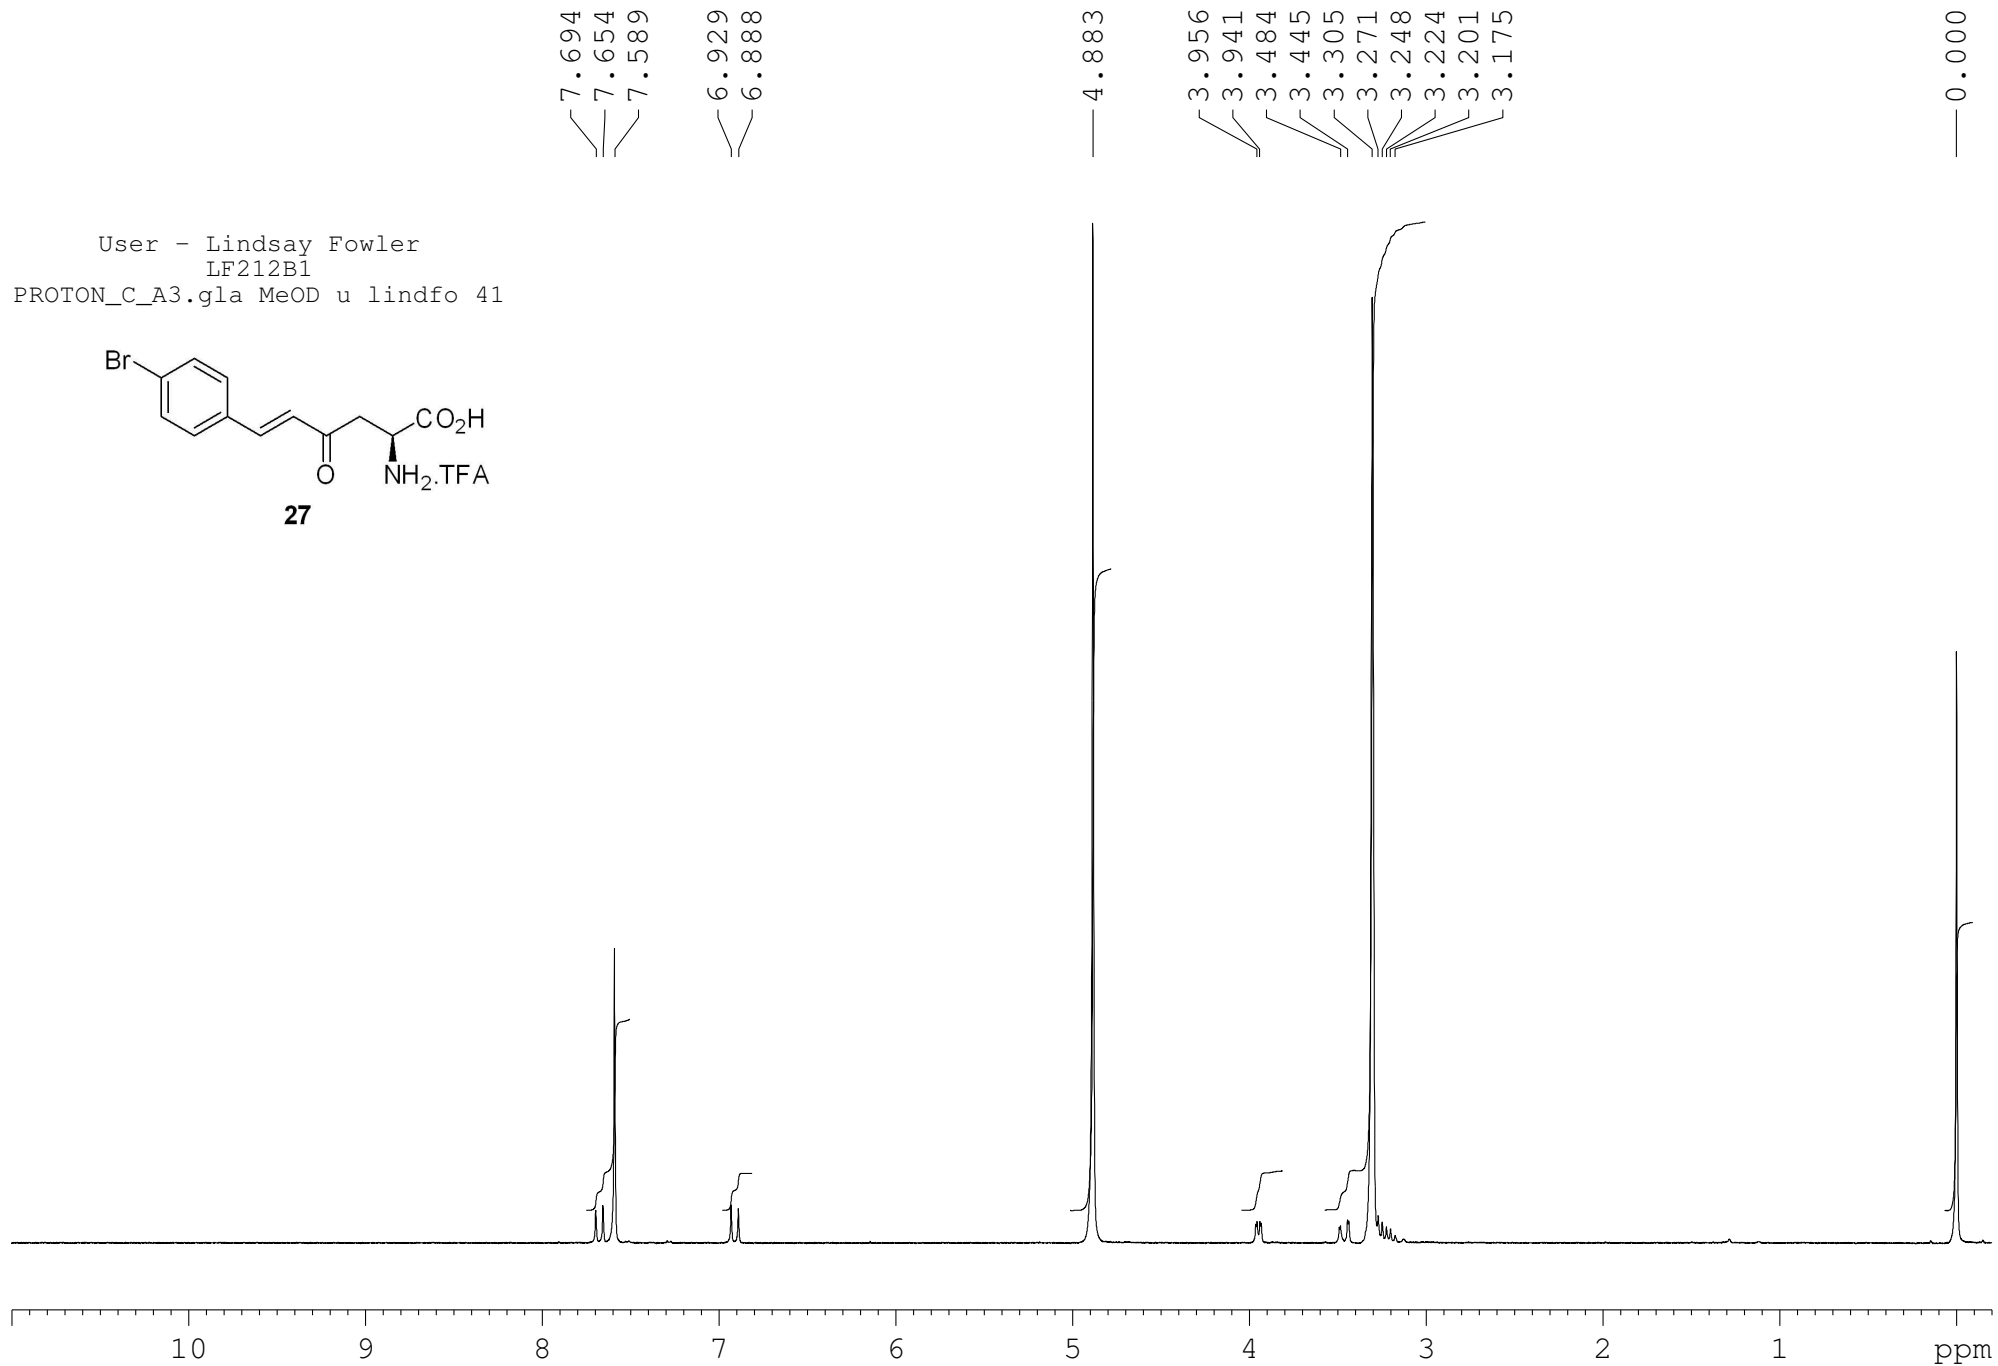

— 197.681

— 171.514

— 144.574  
134.819  
133.426  
131.374  
129.749  
126.691  
126.226

49.686  
49.473  
49.261  
49.048  
48.835  
48.623  
48.410  
40.914

User - Lindsay Fowler  
LF212B1  
C13CPD\_A3.gla MeOD u lindfo 14

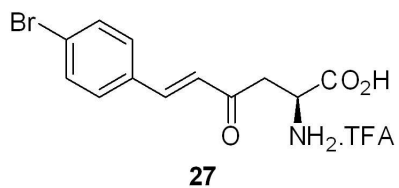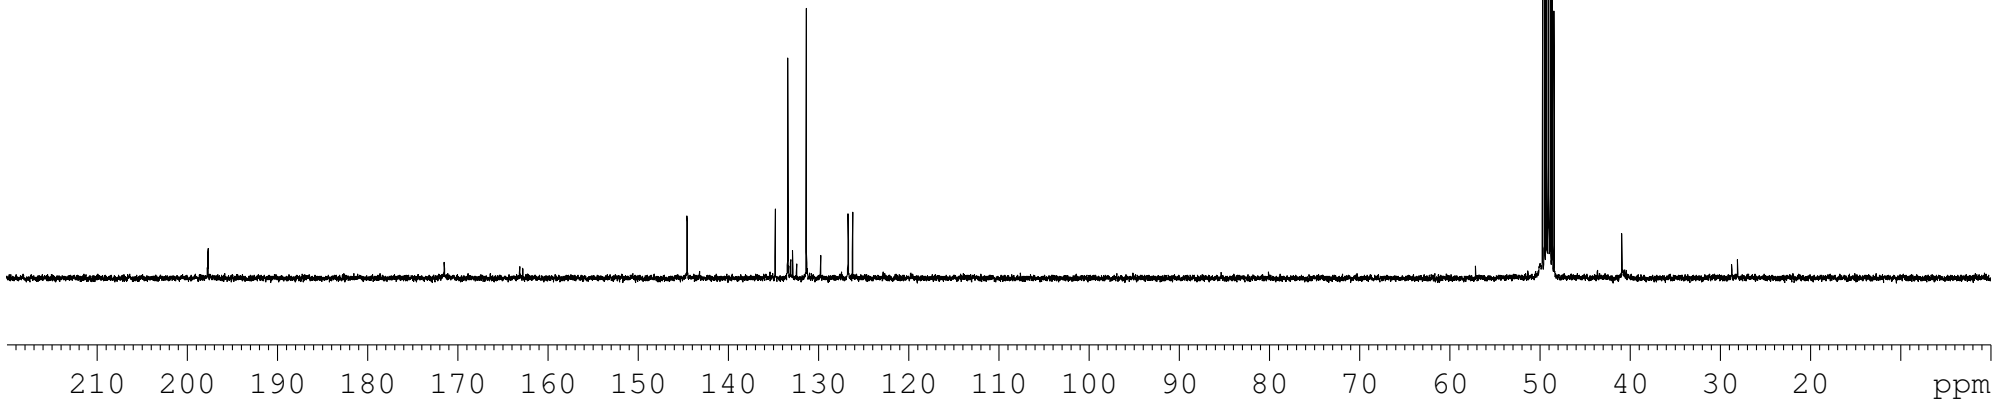



7.284  
7.280  
7.265  
7.252  
7.247  
7.214  
7.210  
7.193  
7.184  
7.166  
7.148  
7.070  
7.053  
7.036  
7.030  
7.013  
6.996  
6.193  
6.190  
6.186  
6.153  
6.150  
6.146  
6.146  
4.895  
4.126  
4.117  
4.106  
4.098  
3.358  
3.354  
3.350  
3.346  
3.337  
3.331  
3.313  
3.308  
3.304  
3.300  
3.296  
3.290  
3.263  
3.259  
3.255  
3.251  
3.247  
3.231  
3.211  
3.184  
3.164  
2.831  
2.813  
2.793  
2.618  
2.601  
2.584  
2.581  
2.566  
0.000

User Lindsay Fowler  
LF206B1  
PROTON\_C\_A3.gla MeOD u lindfo 16

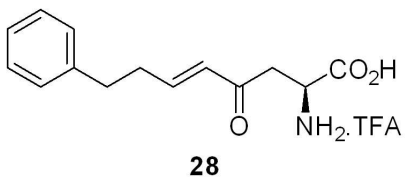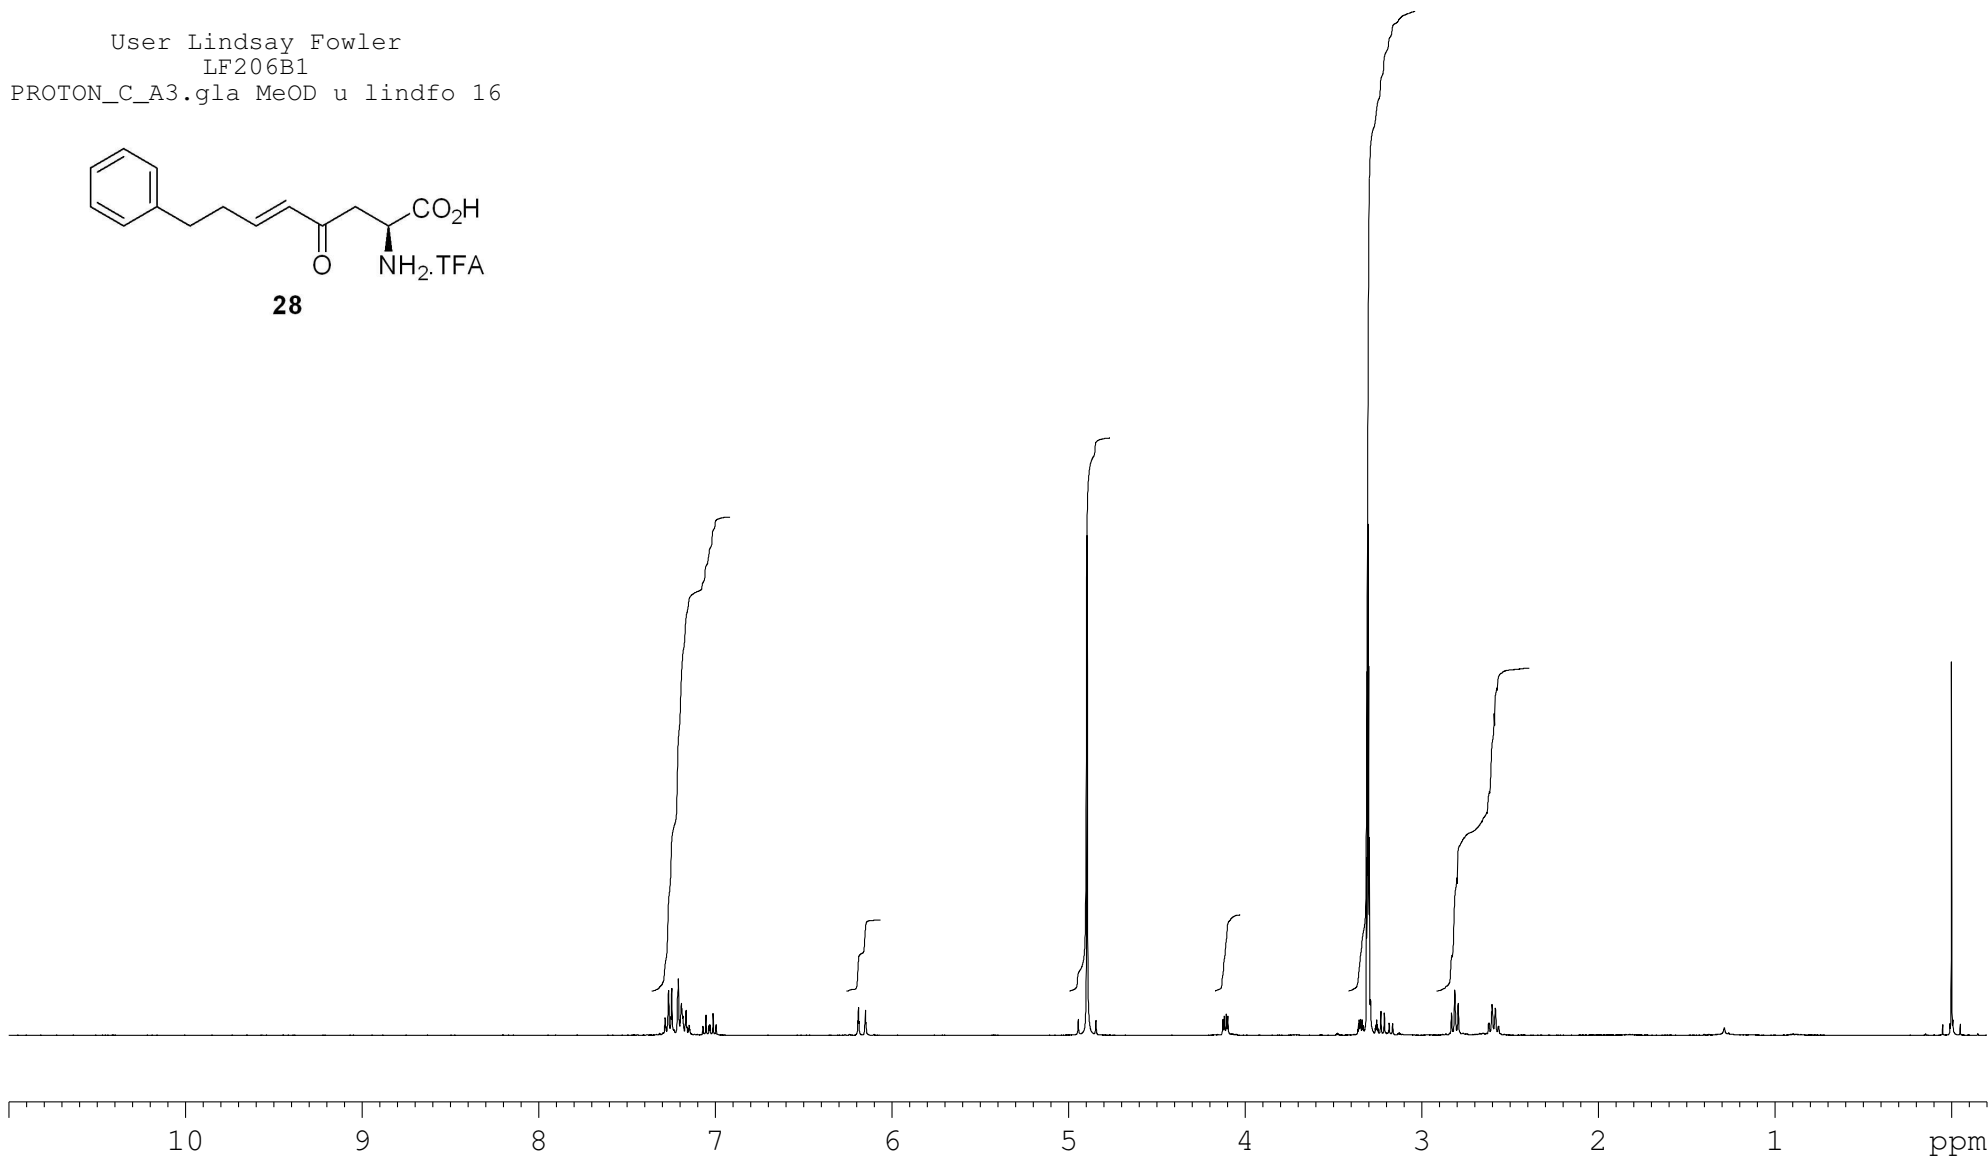

— 198.113

— 150.506

— 142.131

130.836

129.542

129.482

127.246

50.463

49.671

49.459

49.246

49.033

48.821

48.608

48.395

40.419

35.464

35.250

User - Lindsay Fowler  
LF206B1  
C13CPD\_A3.gla MeOD u lindfo 3

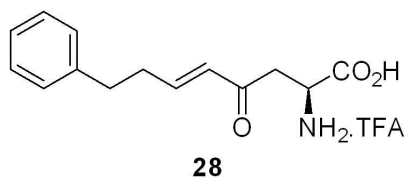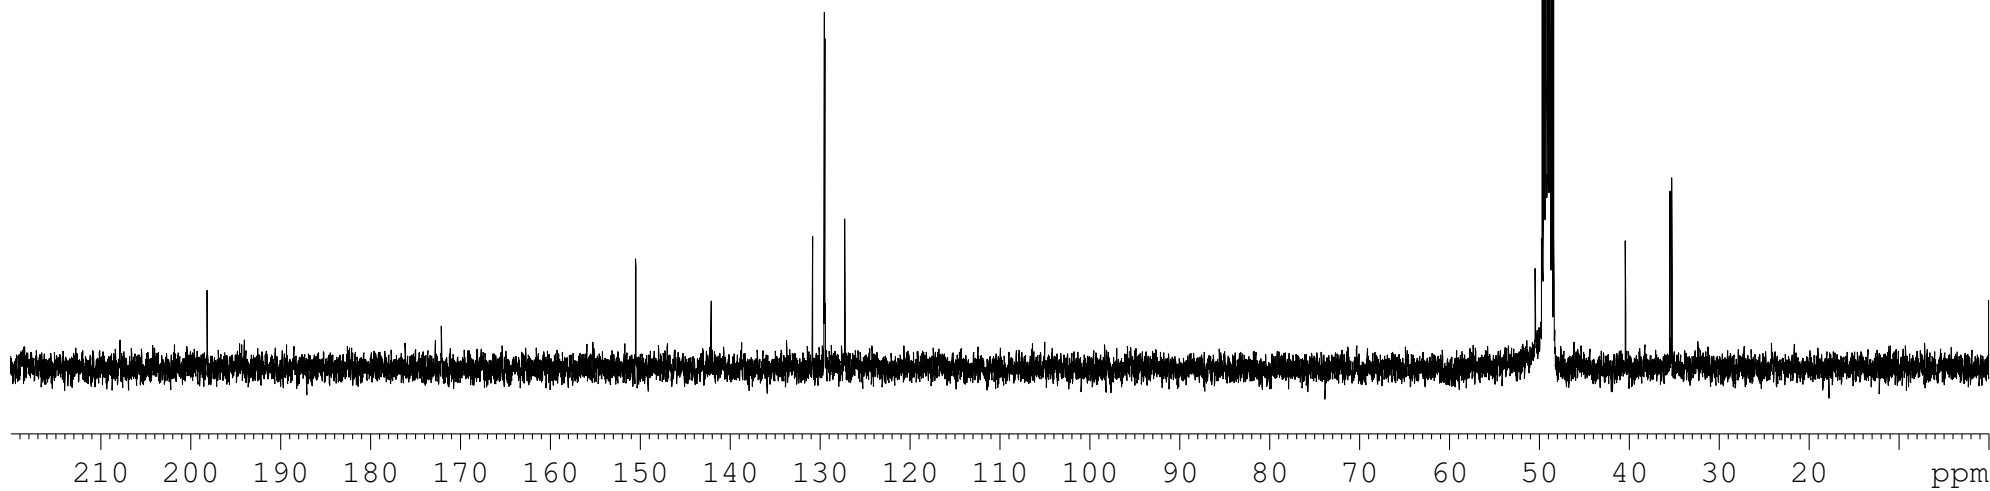

8.588  
8.548  
8.288  
8.267  
8.246  
7.948  
7.928  
7.636  
7.619  
7.602  
7.591  
7.571  
7.553  
7.220  
7.200  
6.968  
6.929

4.947  
4.897  
4.407  
4.392  
4.381  
3.552  
3.545  
3.536  
3.314  
3.310  
3.306  
3.302  
3.298  
2.995

0.000

User Lindsay Fowler  
LF208B1  
PROTON\_C\_A3.gla MeOD u lindfo 21

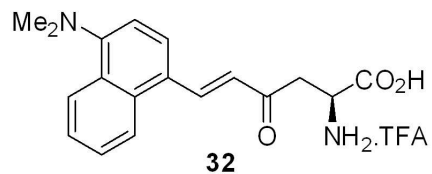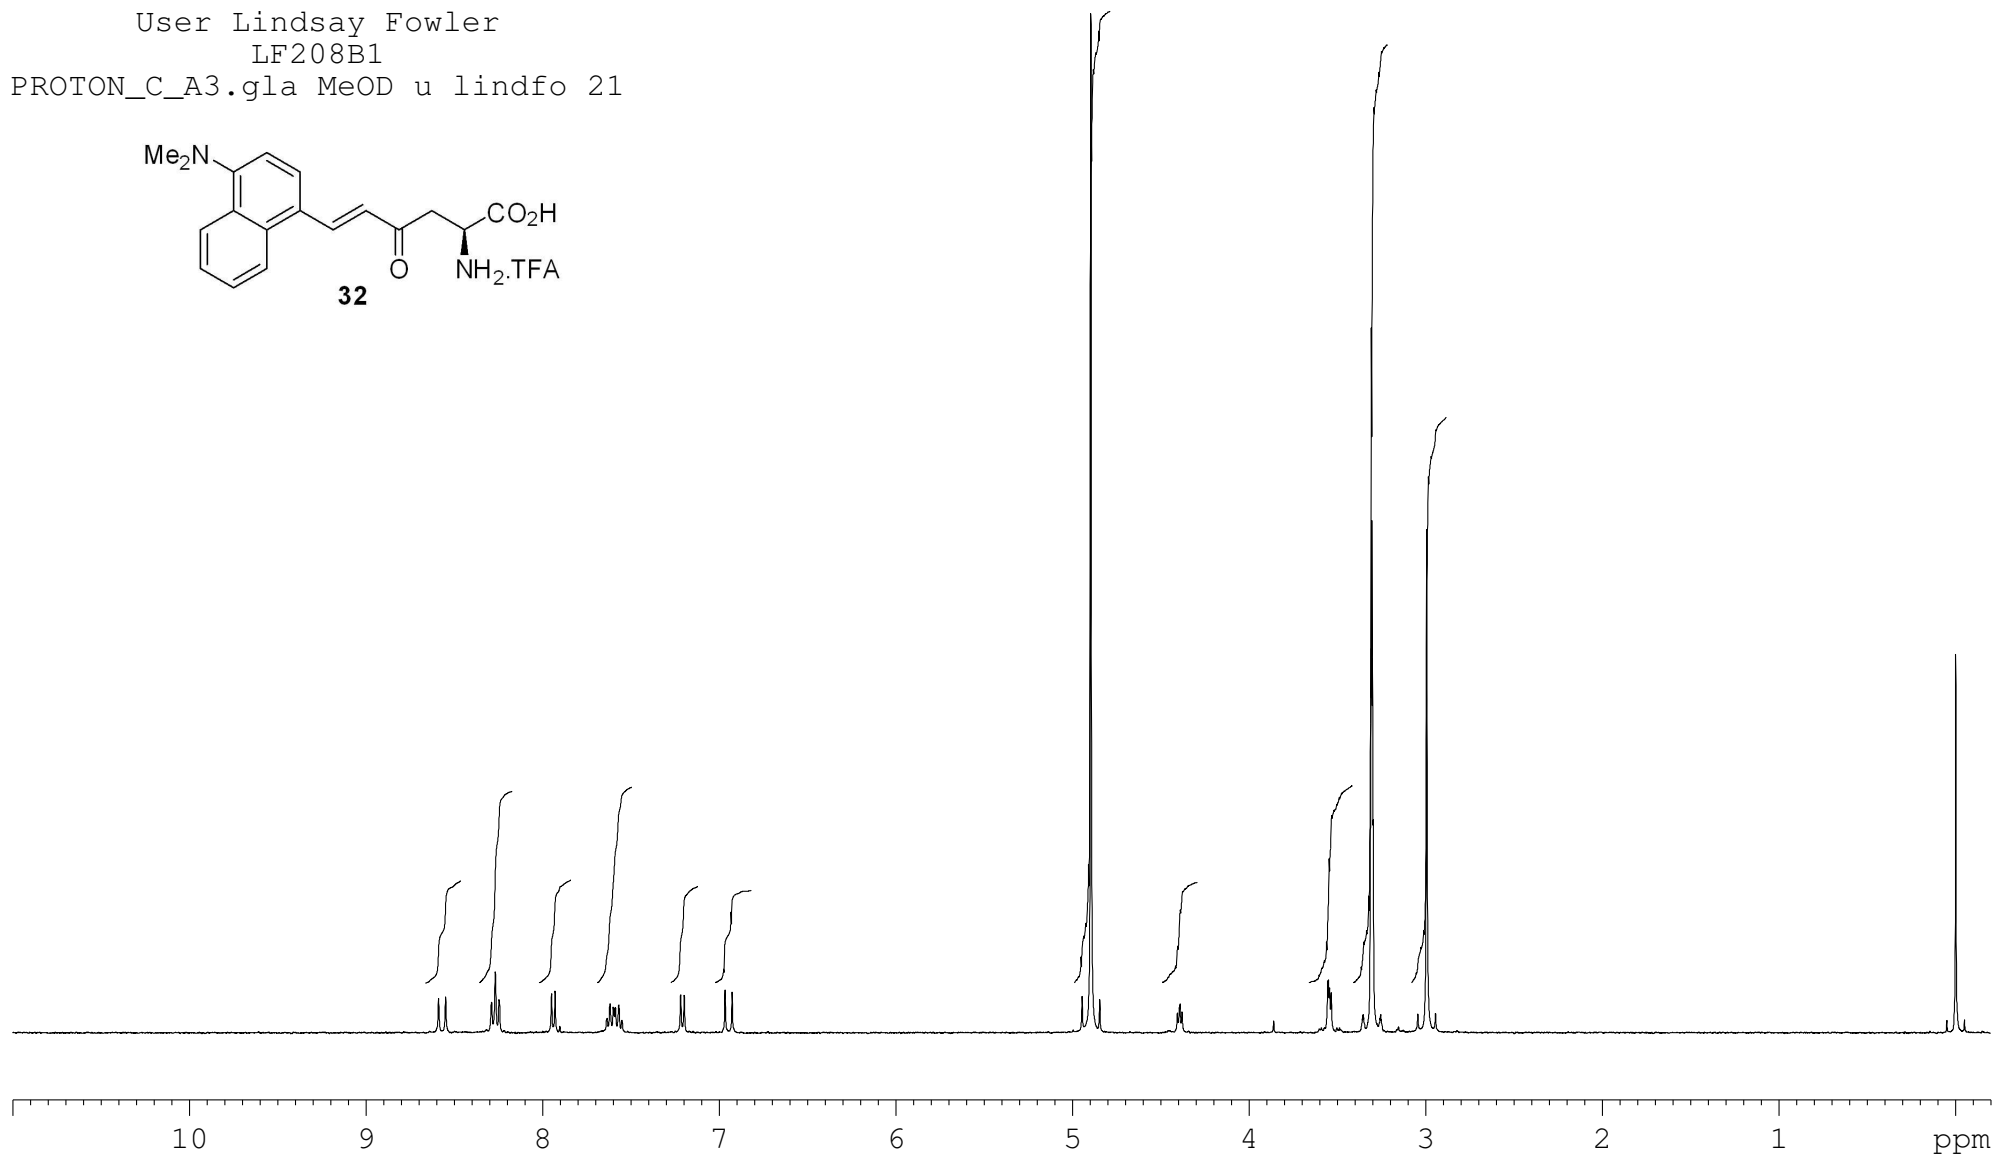

—197.447

—171.325

—152.818

142.339

134.477

128.986

128.438

128.055

127.209

127.065

126.595

125.432

124.742

115.483

49.998

49.681

49.468

49.255

49.042

48.829

48.617

48.404

45.665

40.987

User Lindsay Fowler  
LF208B1  
C13CPD\_A3.gla MeOD u lindfo 14

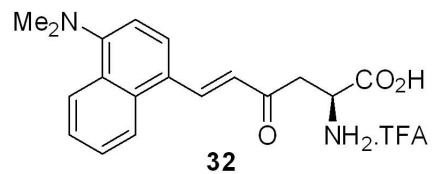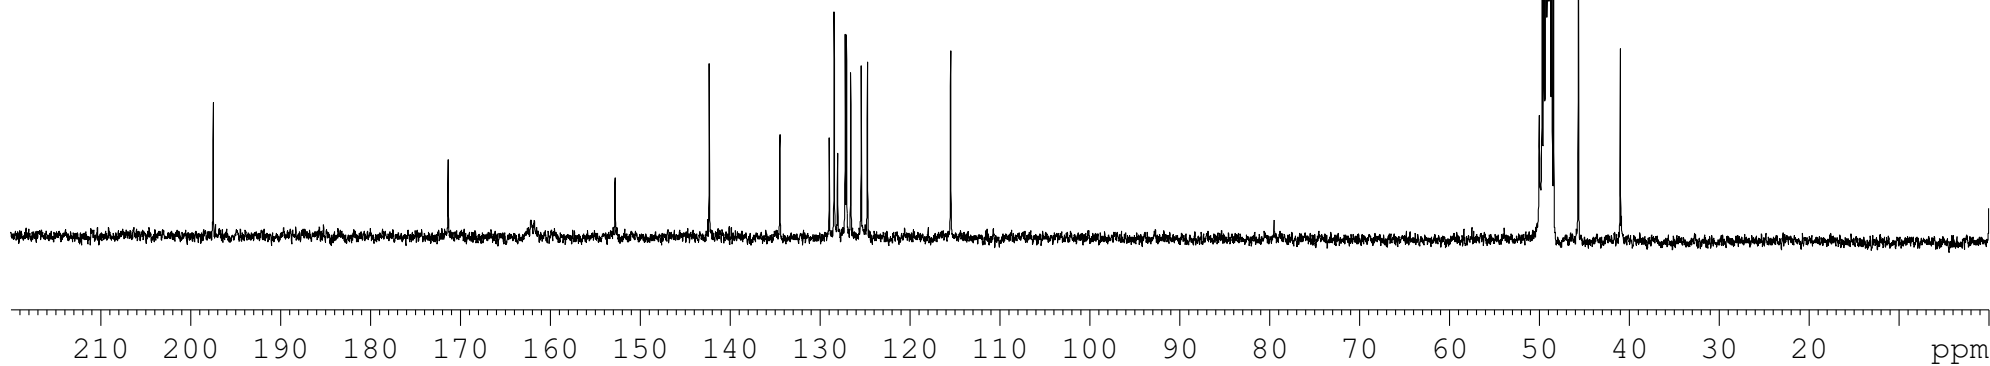

Supplement: b912782h.pdf [file b912782h.pdf]
